# Supplementary material
Source: MDPI journal article supplement (https://www.mdpi.com/2227-9040/10/3/116)
Supplement: s1 [file s1]

# Dynamic potentiometry with an ion-selective electrode: a tool for qualitative and quantitative analysis of inorganic and organic cations

## Supplementary Materials

### Content

**Figure S1.** Transient potential signals obtained for individual cations and mixtures (blue) and their corresponding reconstructed signals superimposed (red). Individual cations  $\text{Li}^+$ ,  $\text{Na}^+$ ,  $\text{K}^+$ ,  $\text{Rb}^+$ ,  $\text{Ca}^{2+}$ ,  $\text{Mg}^{2+}$ ,  $\text{H}^+$ ,  $\text{Ch}^+$ ,  $\text{AcCh}^+$  and  $\text{Pr}^+$ . Cation mixture  $\text{Ch}^+$ ,  $\text{Na}^+$ .

**Figure S2.** Three-dimensional plots PC1 and PC2 scores versus  $\log C$  (left) and plots of the concentration values predicted versus the actual values (right) for  $\text{H}^+$ ,  $\text{Li}^+$ ,  $\text{Ca}^{2+}$ ,  $\text{Mg}^{2+}$ ,  $\text{AcCh}^+$  and  $\text{Pr}^+$ .

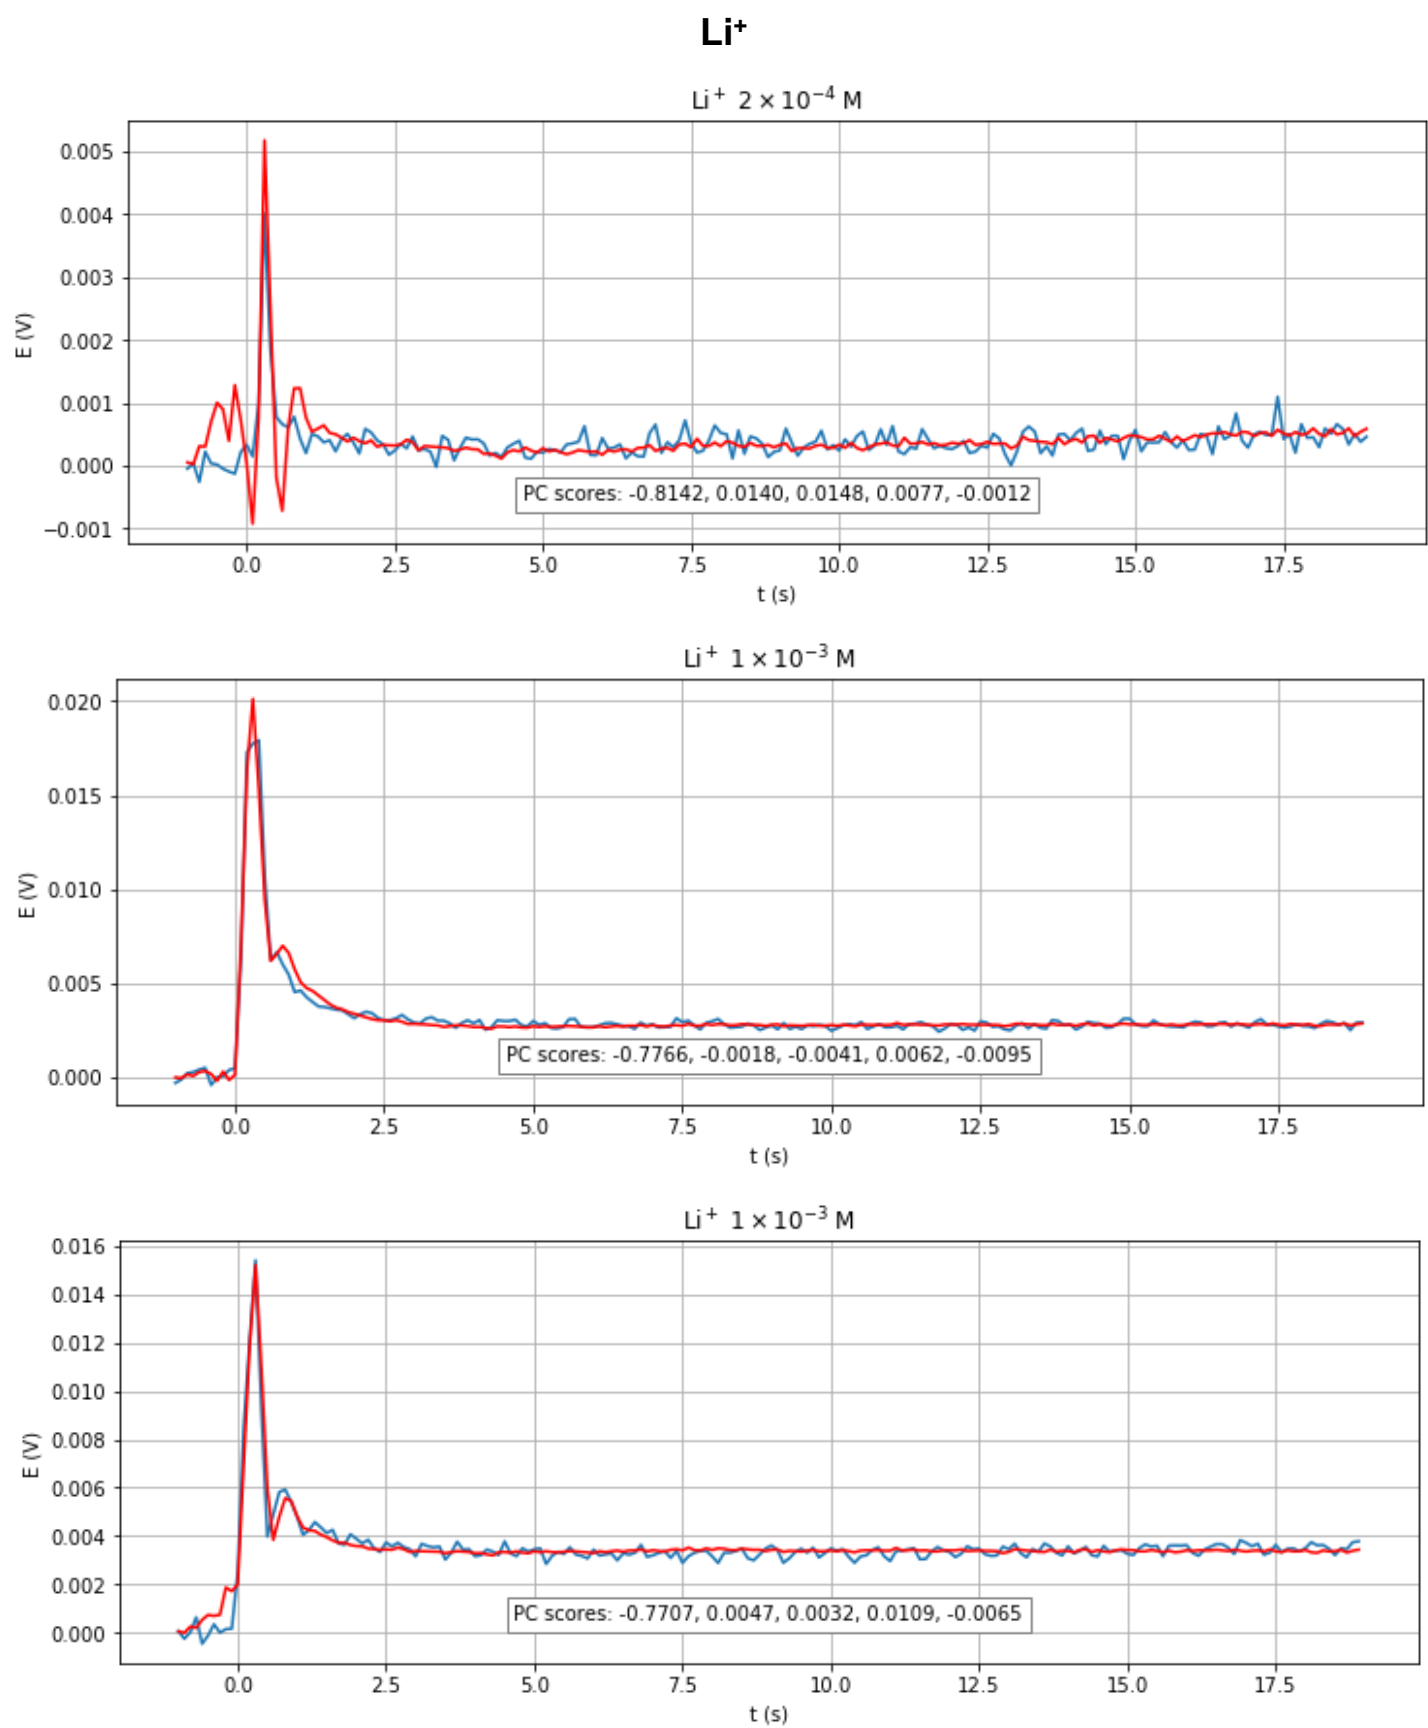

**Figure S1.** Transient potential signals obtained for individual cations and mixtures (blue) and their corresponding reconstructed signals superimposed (red). (Continued).

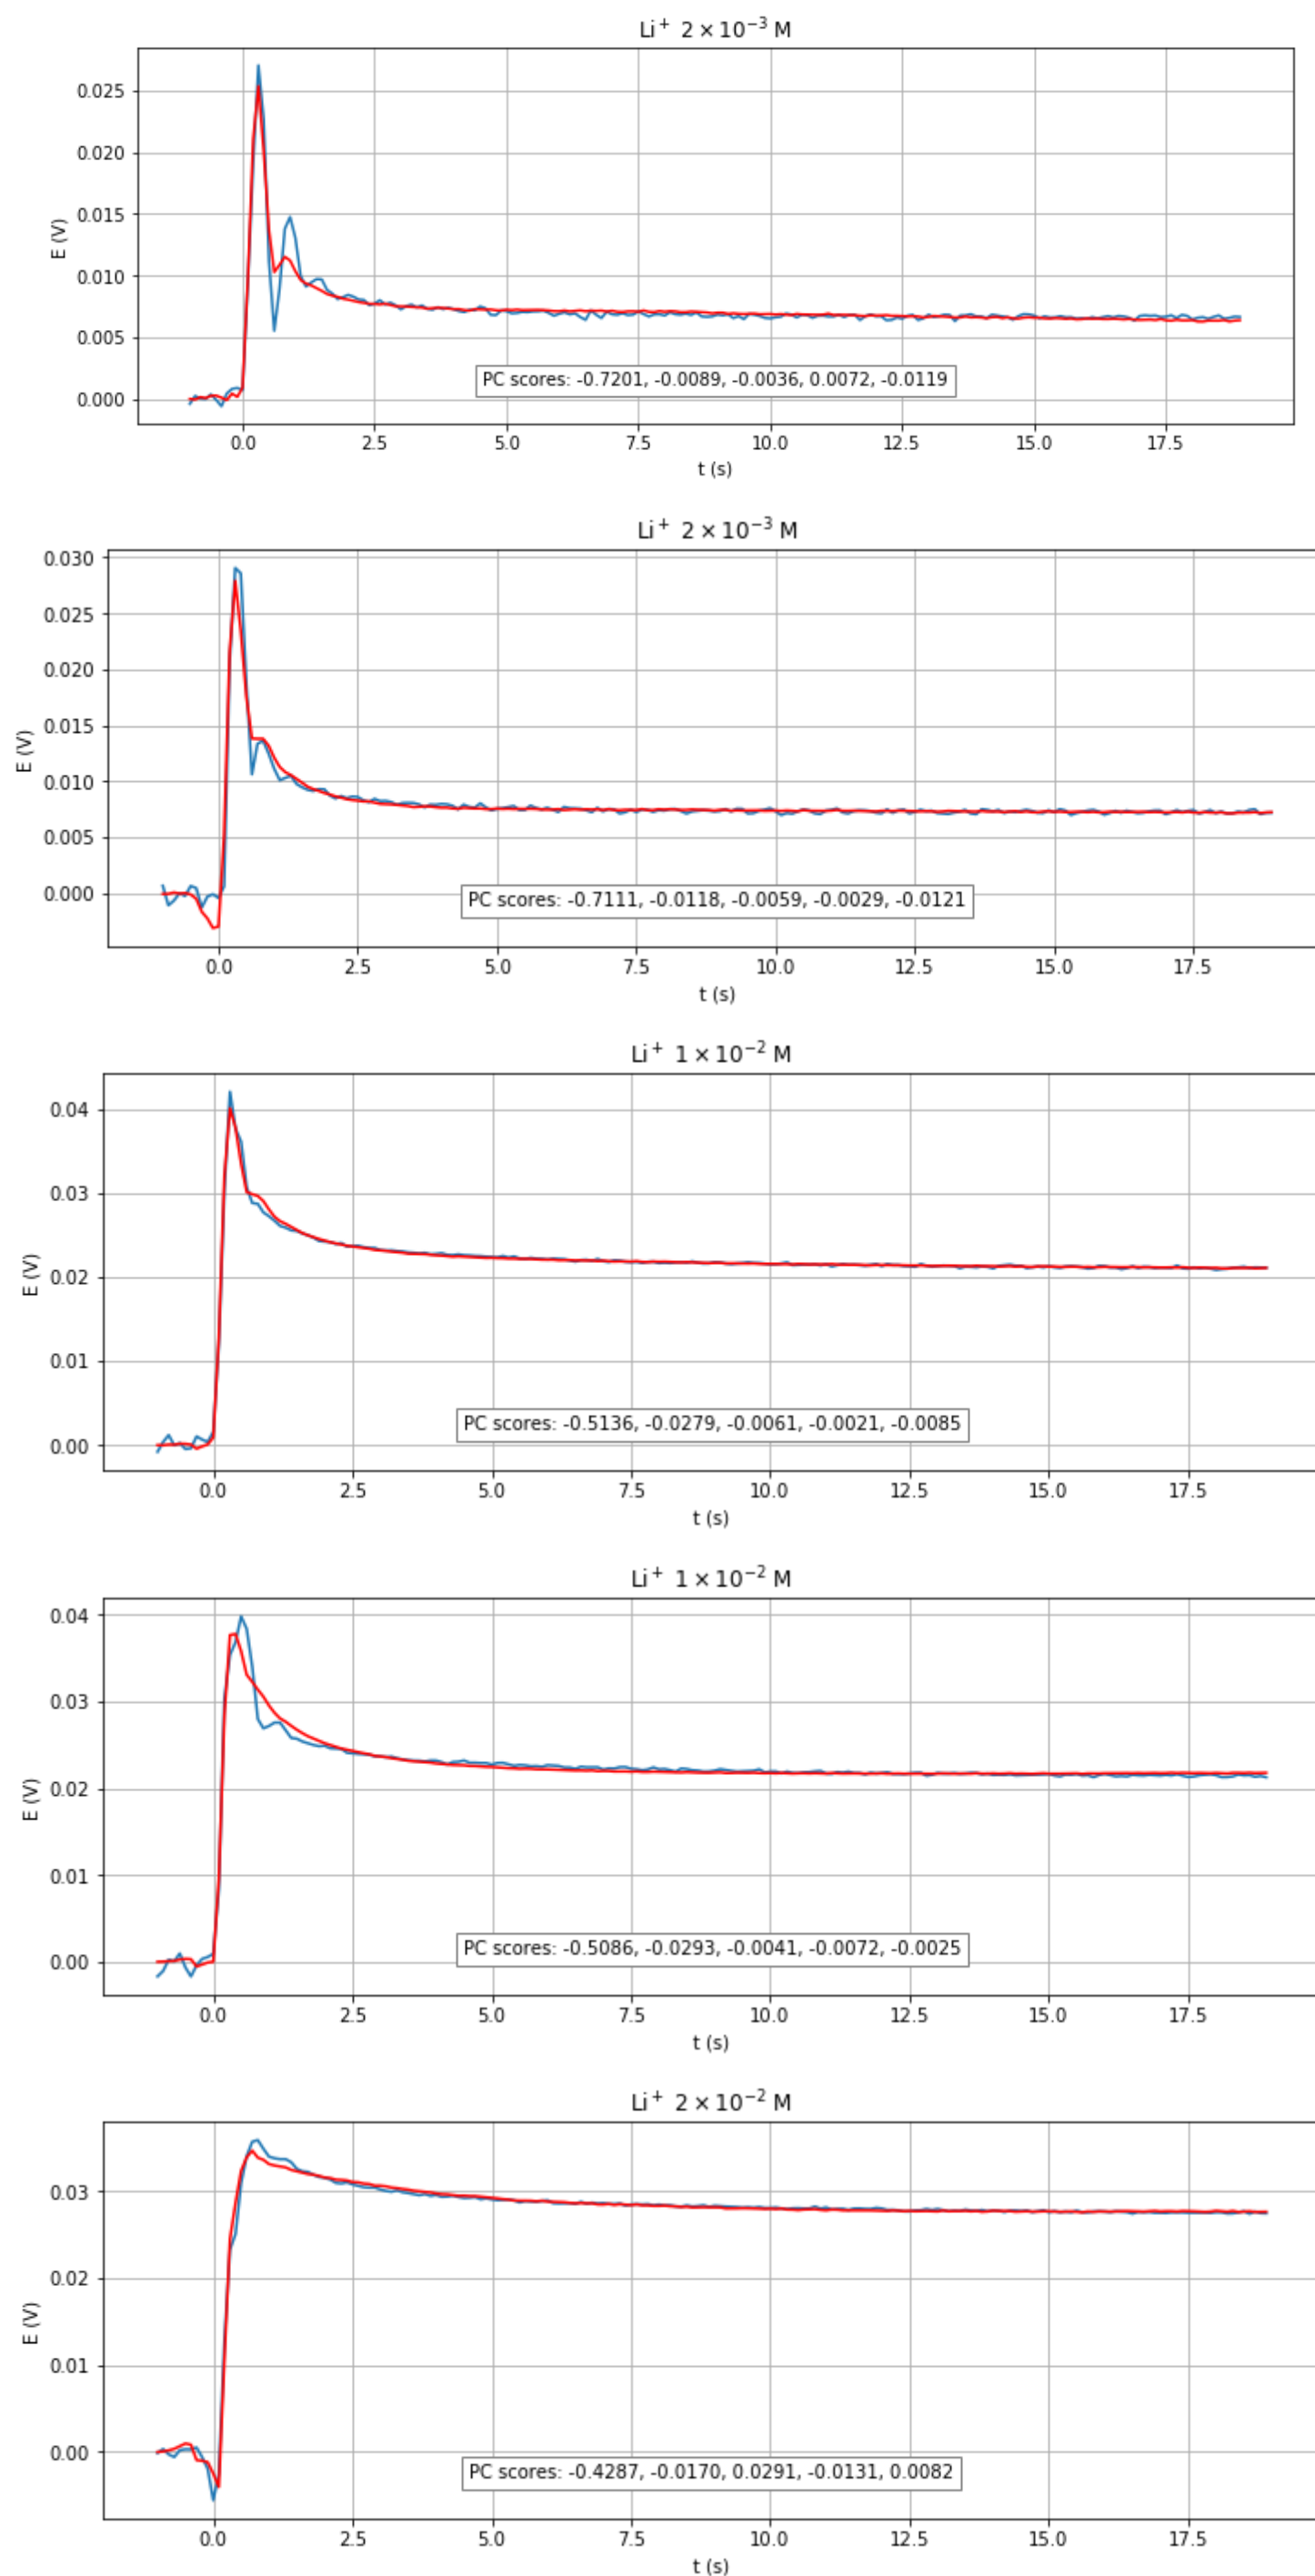

**Figure S1.** Transient potential signals obtained for individual cations and mixtures (blue) and their corresponding reconstructed signals superimposed (red). (Continued).

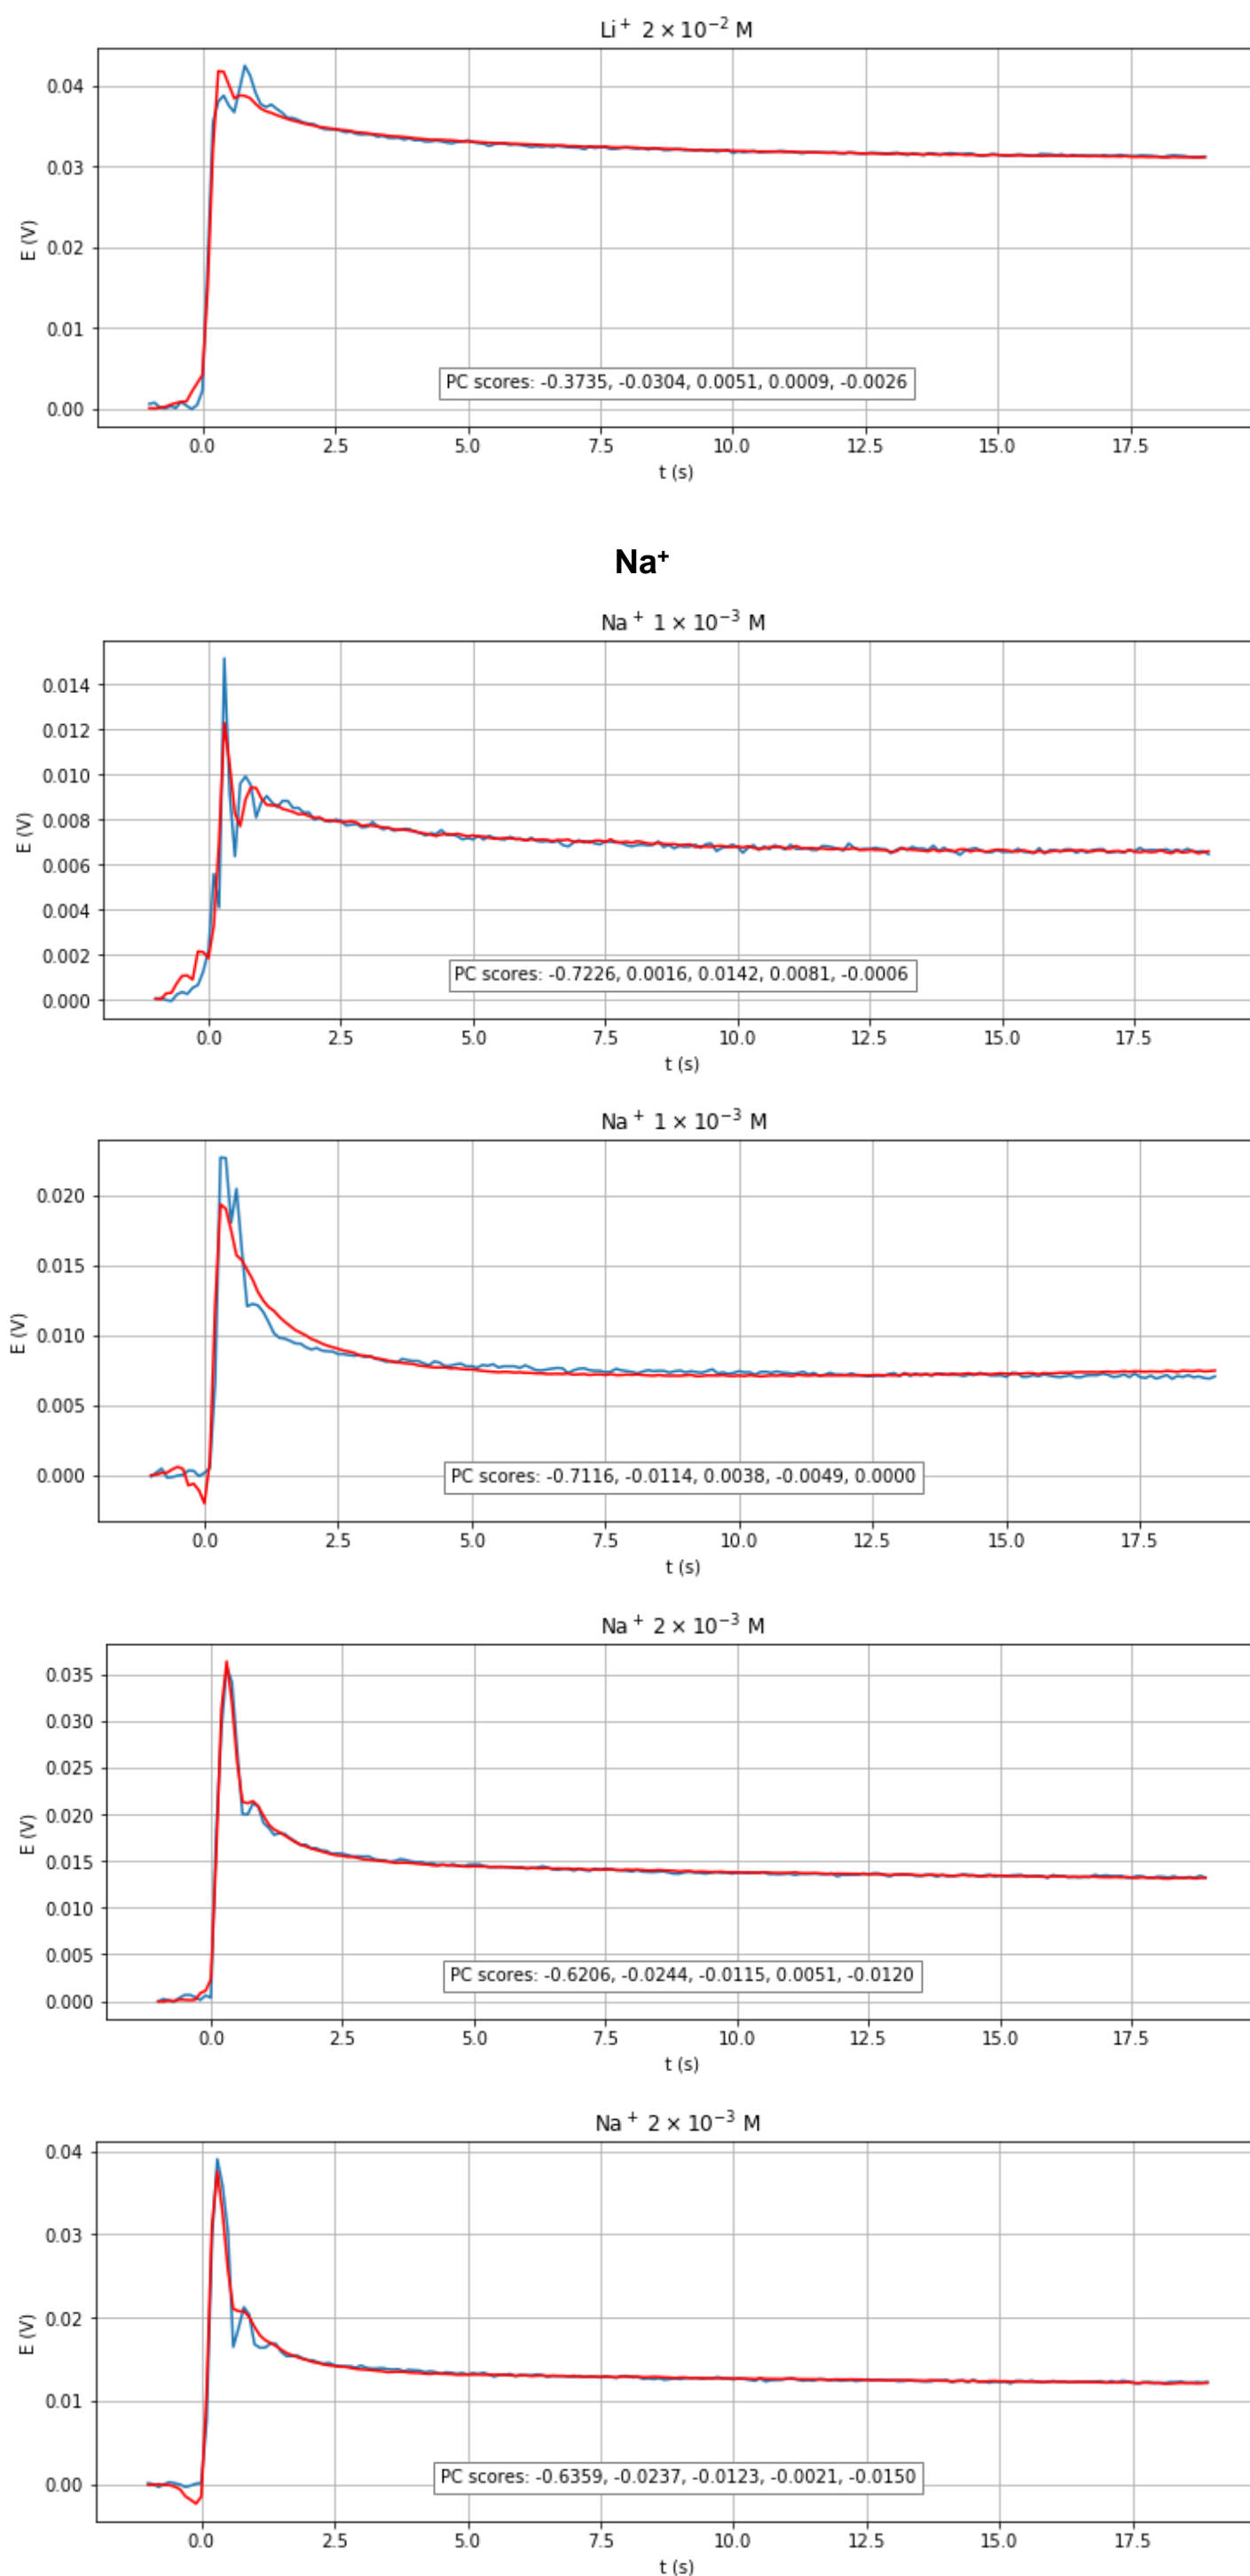

**Figure S1.** Transient potential signals obtained for individual cations and mixtures (blue) and their corresponding reconstructed signals superimposed (red). (Continued).

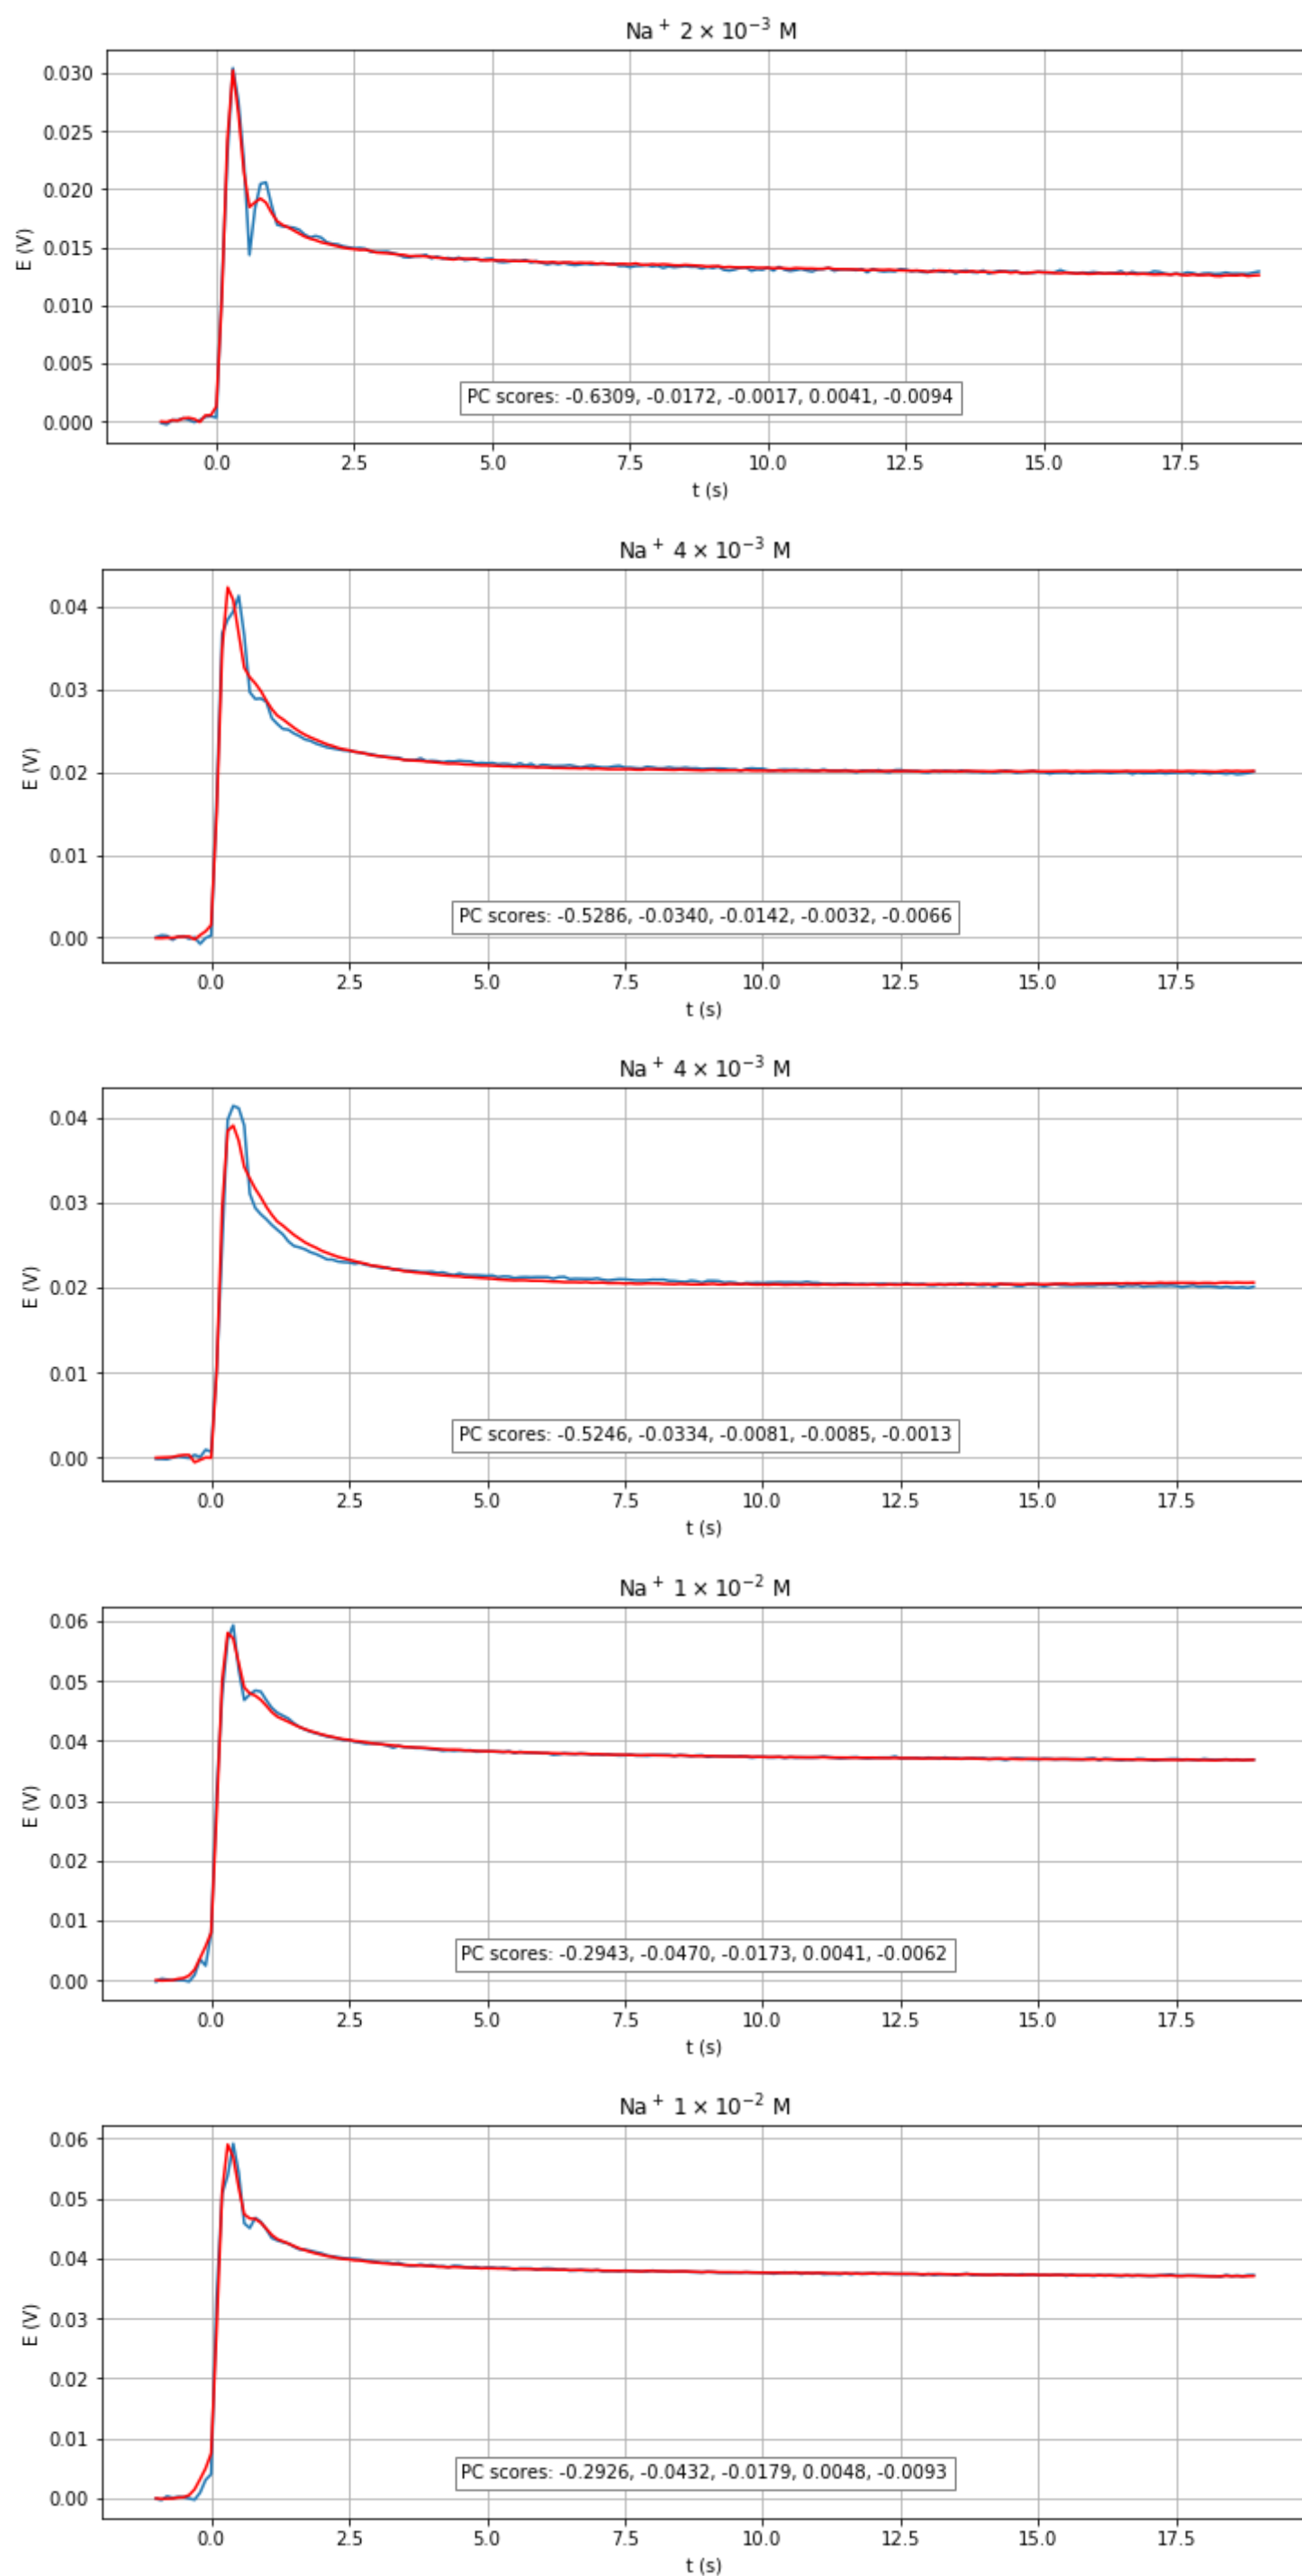

**Figure S1.** Transient potential signals obtained for individual cations and mixtures (blue) and their corresponding reconstructed signals superimposed (red). (Continued).

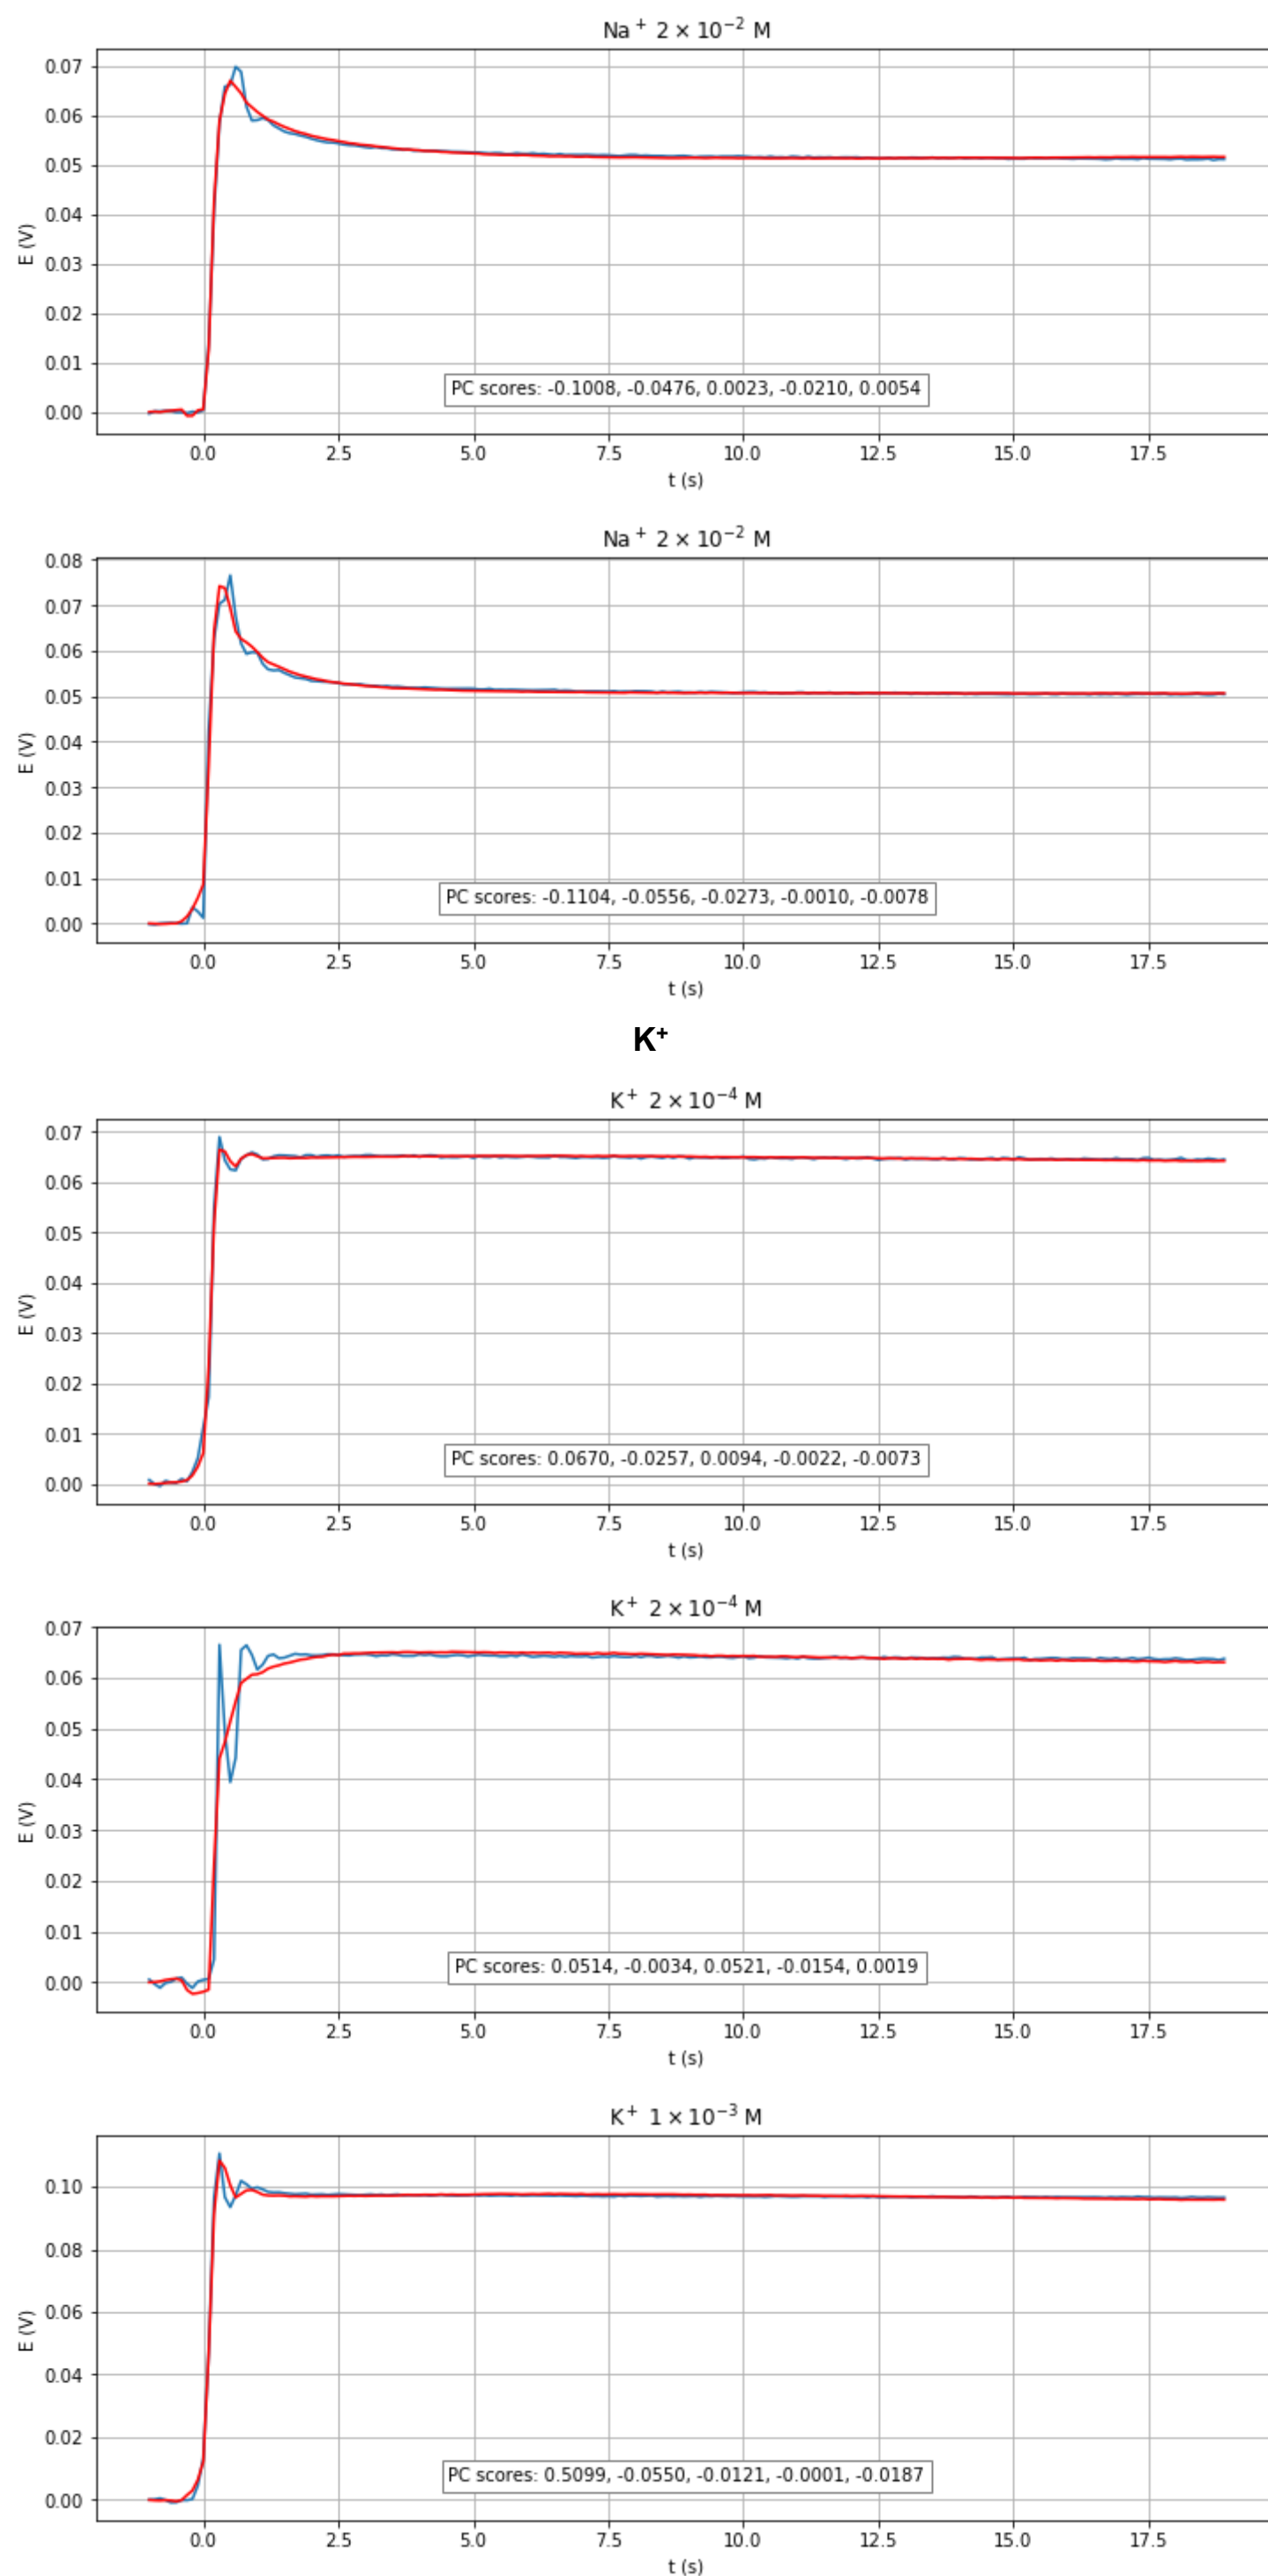

**Figure S1.** Transient potential signals obtained for individual cations and mixtures (blue) and their corresponding reconstructed signals superimposed (red). (Continued).

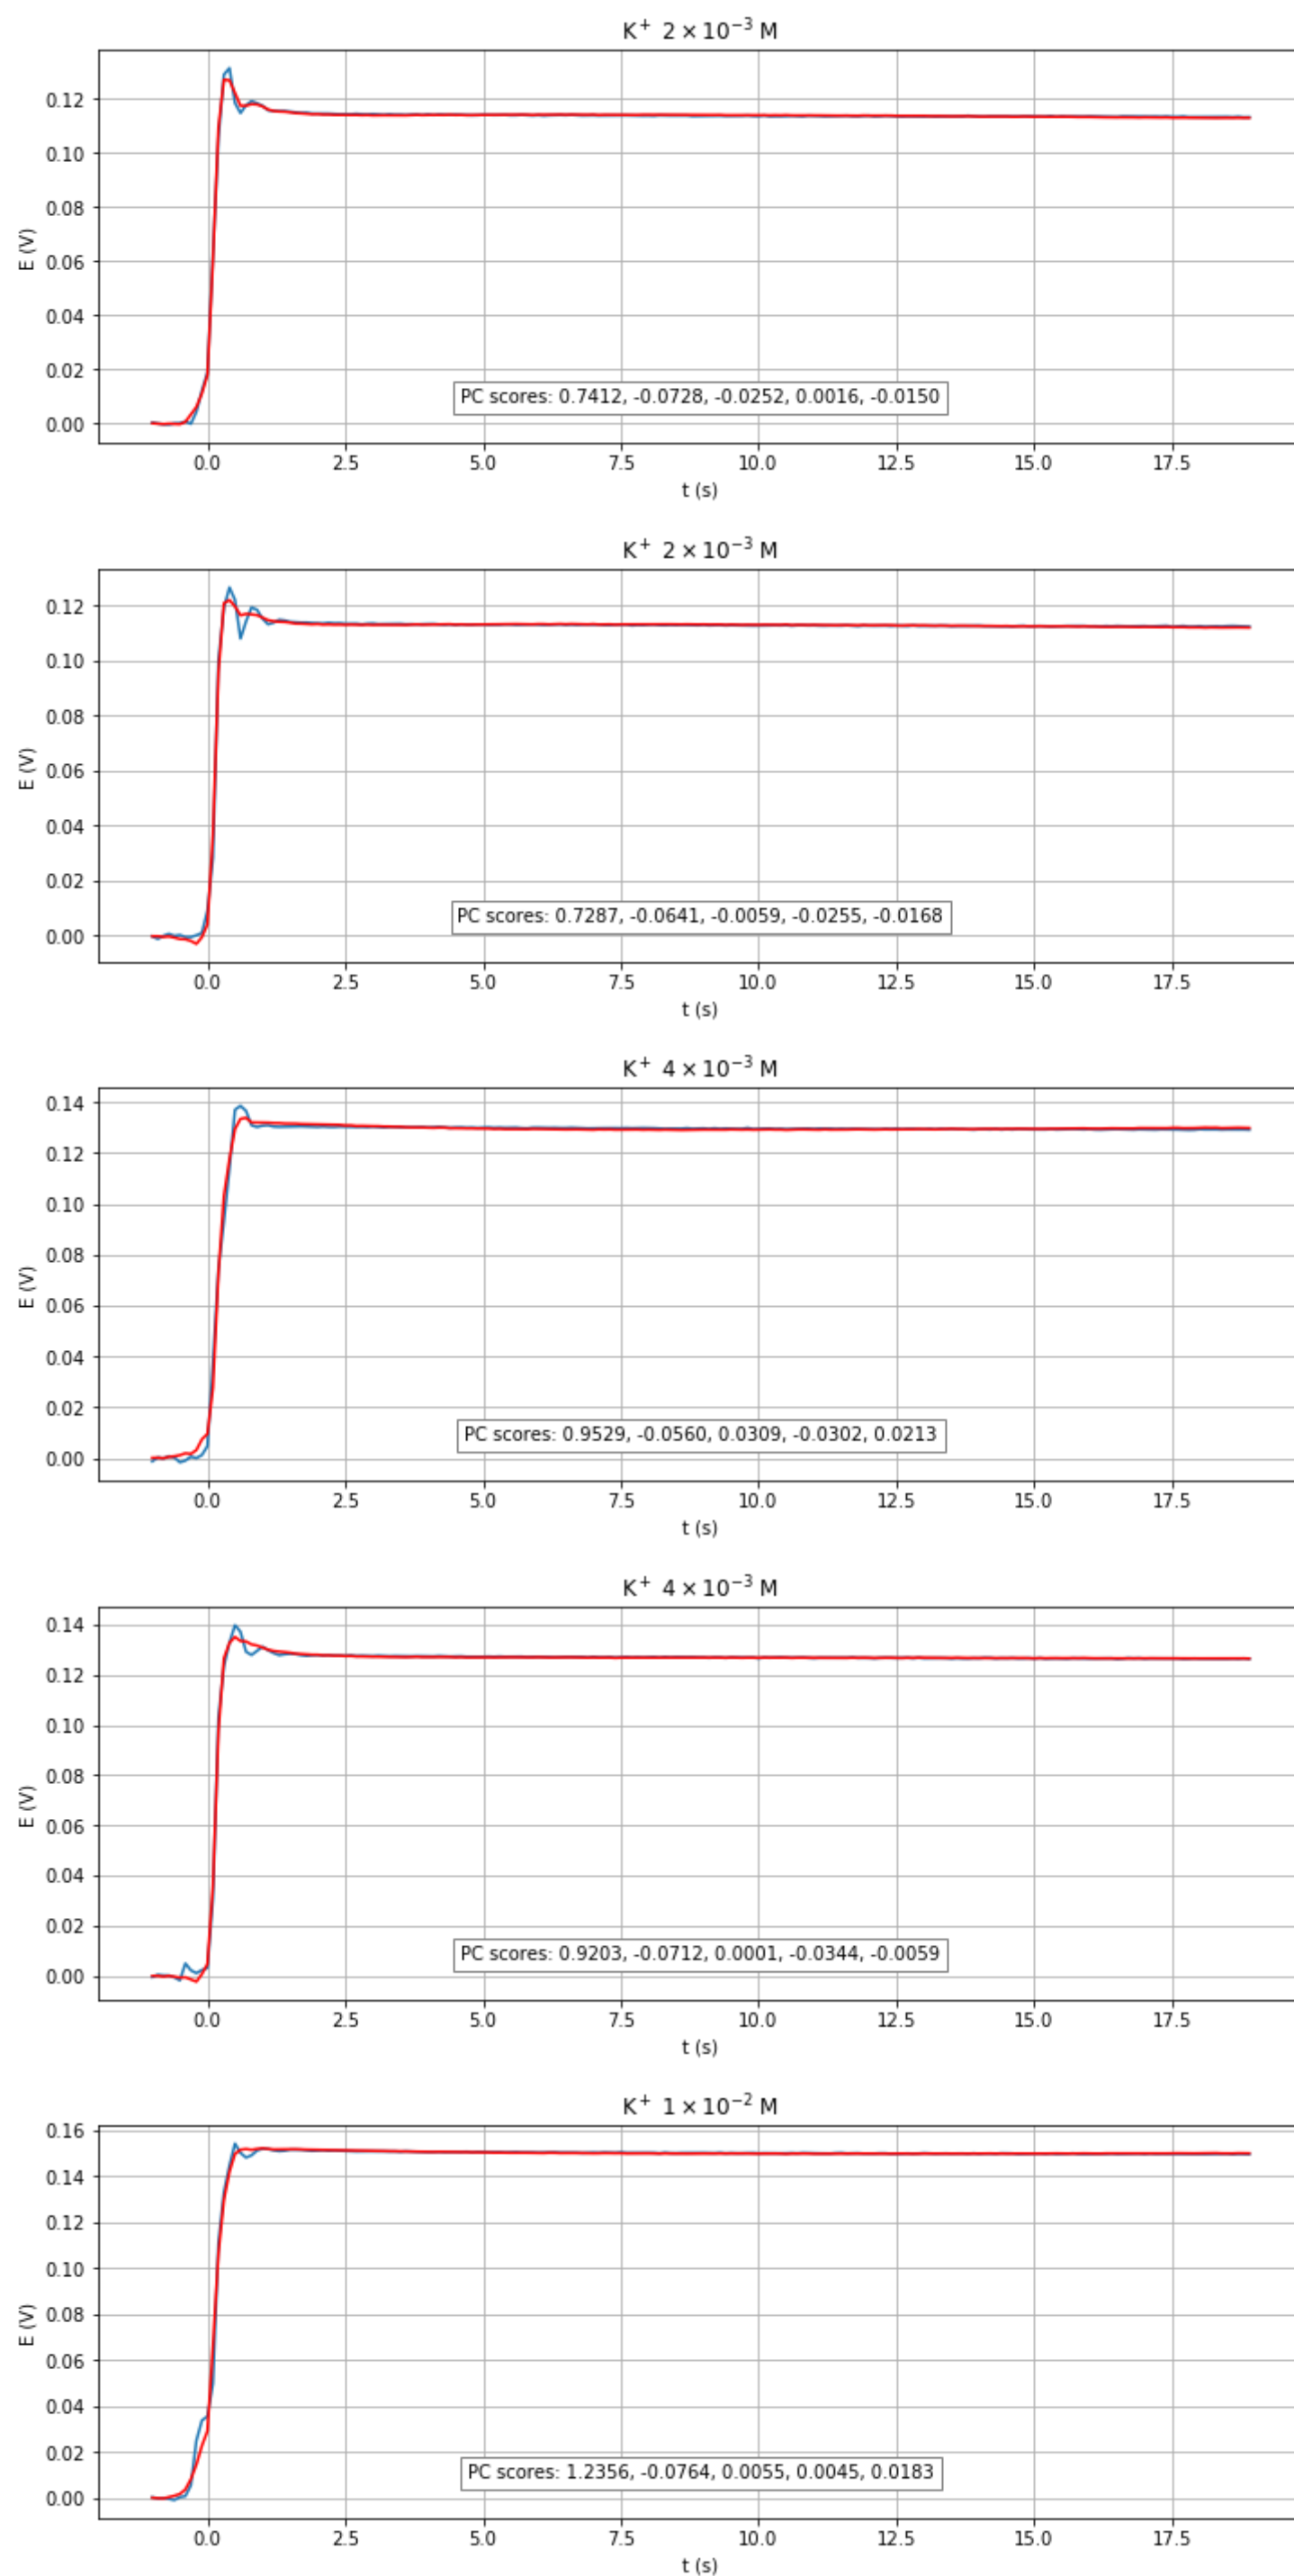

**Figure S1.** Transient potential signals obtained for individual cations and mixtures (blue) and their corresponding reconstructed signals superimposed (red). (Continued)

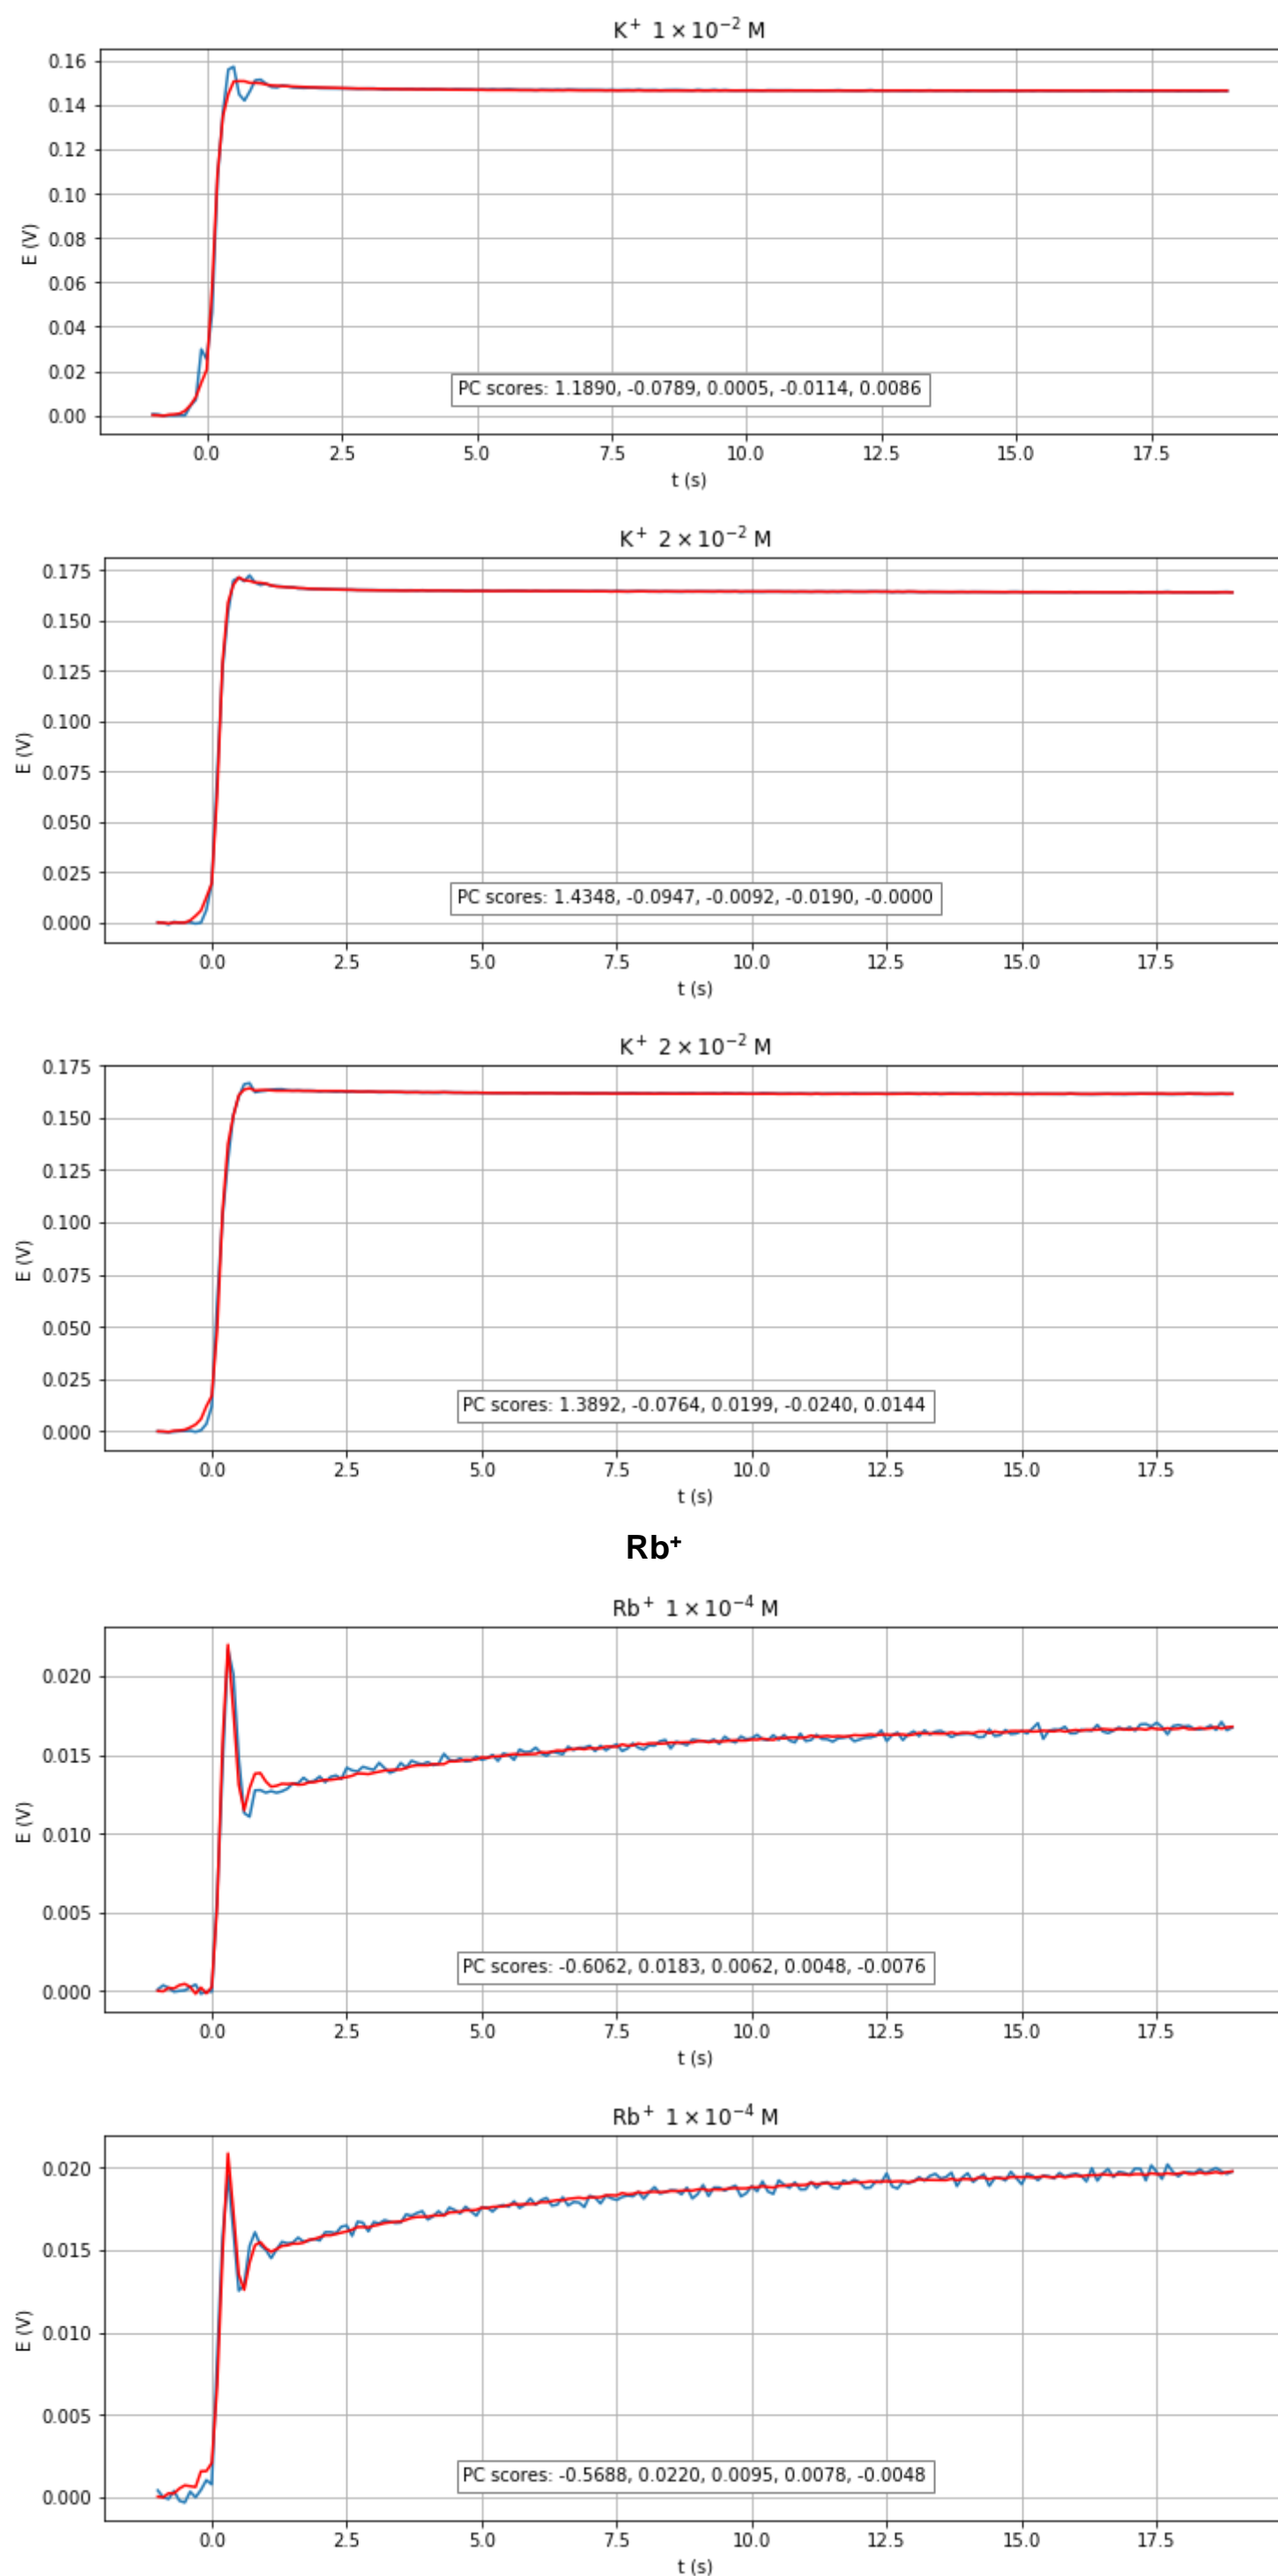

**Figure S1.** Transient potential signals obtained for individual cations and mixtures (blue) and their corresponding reconstructed signals superimposed (red). (Continued).

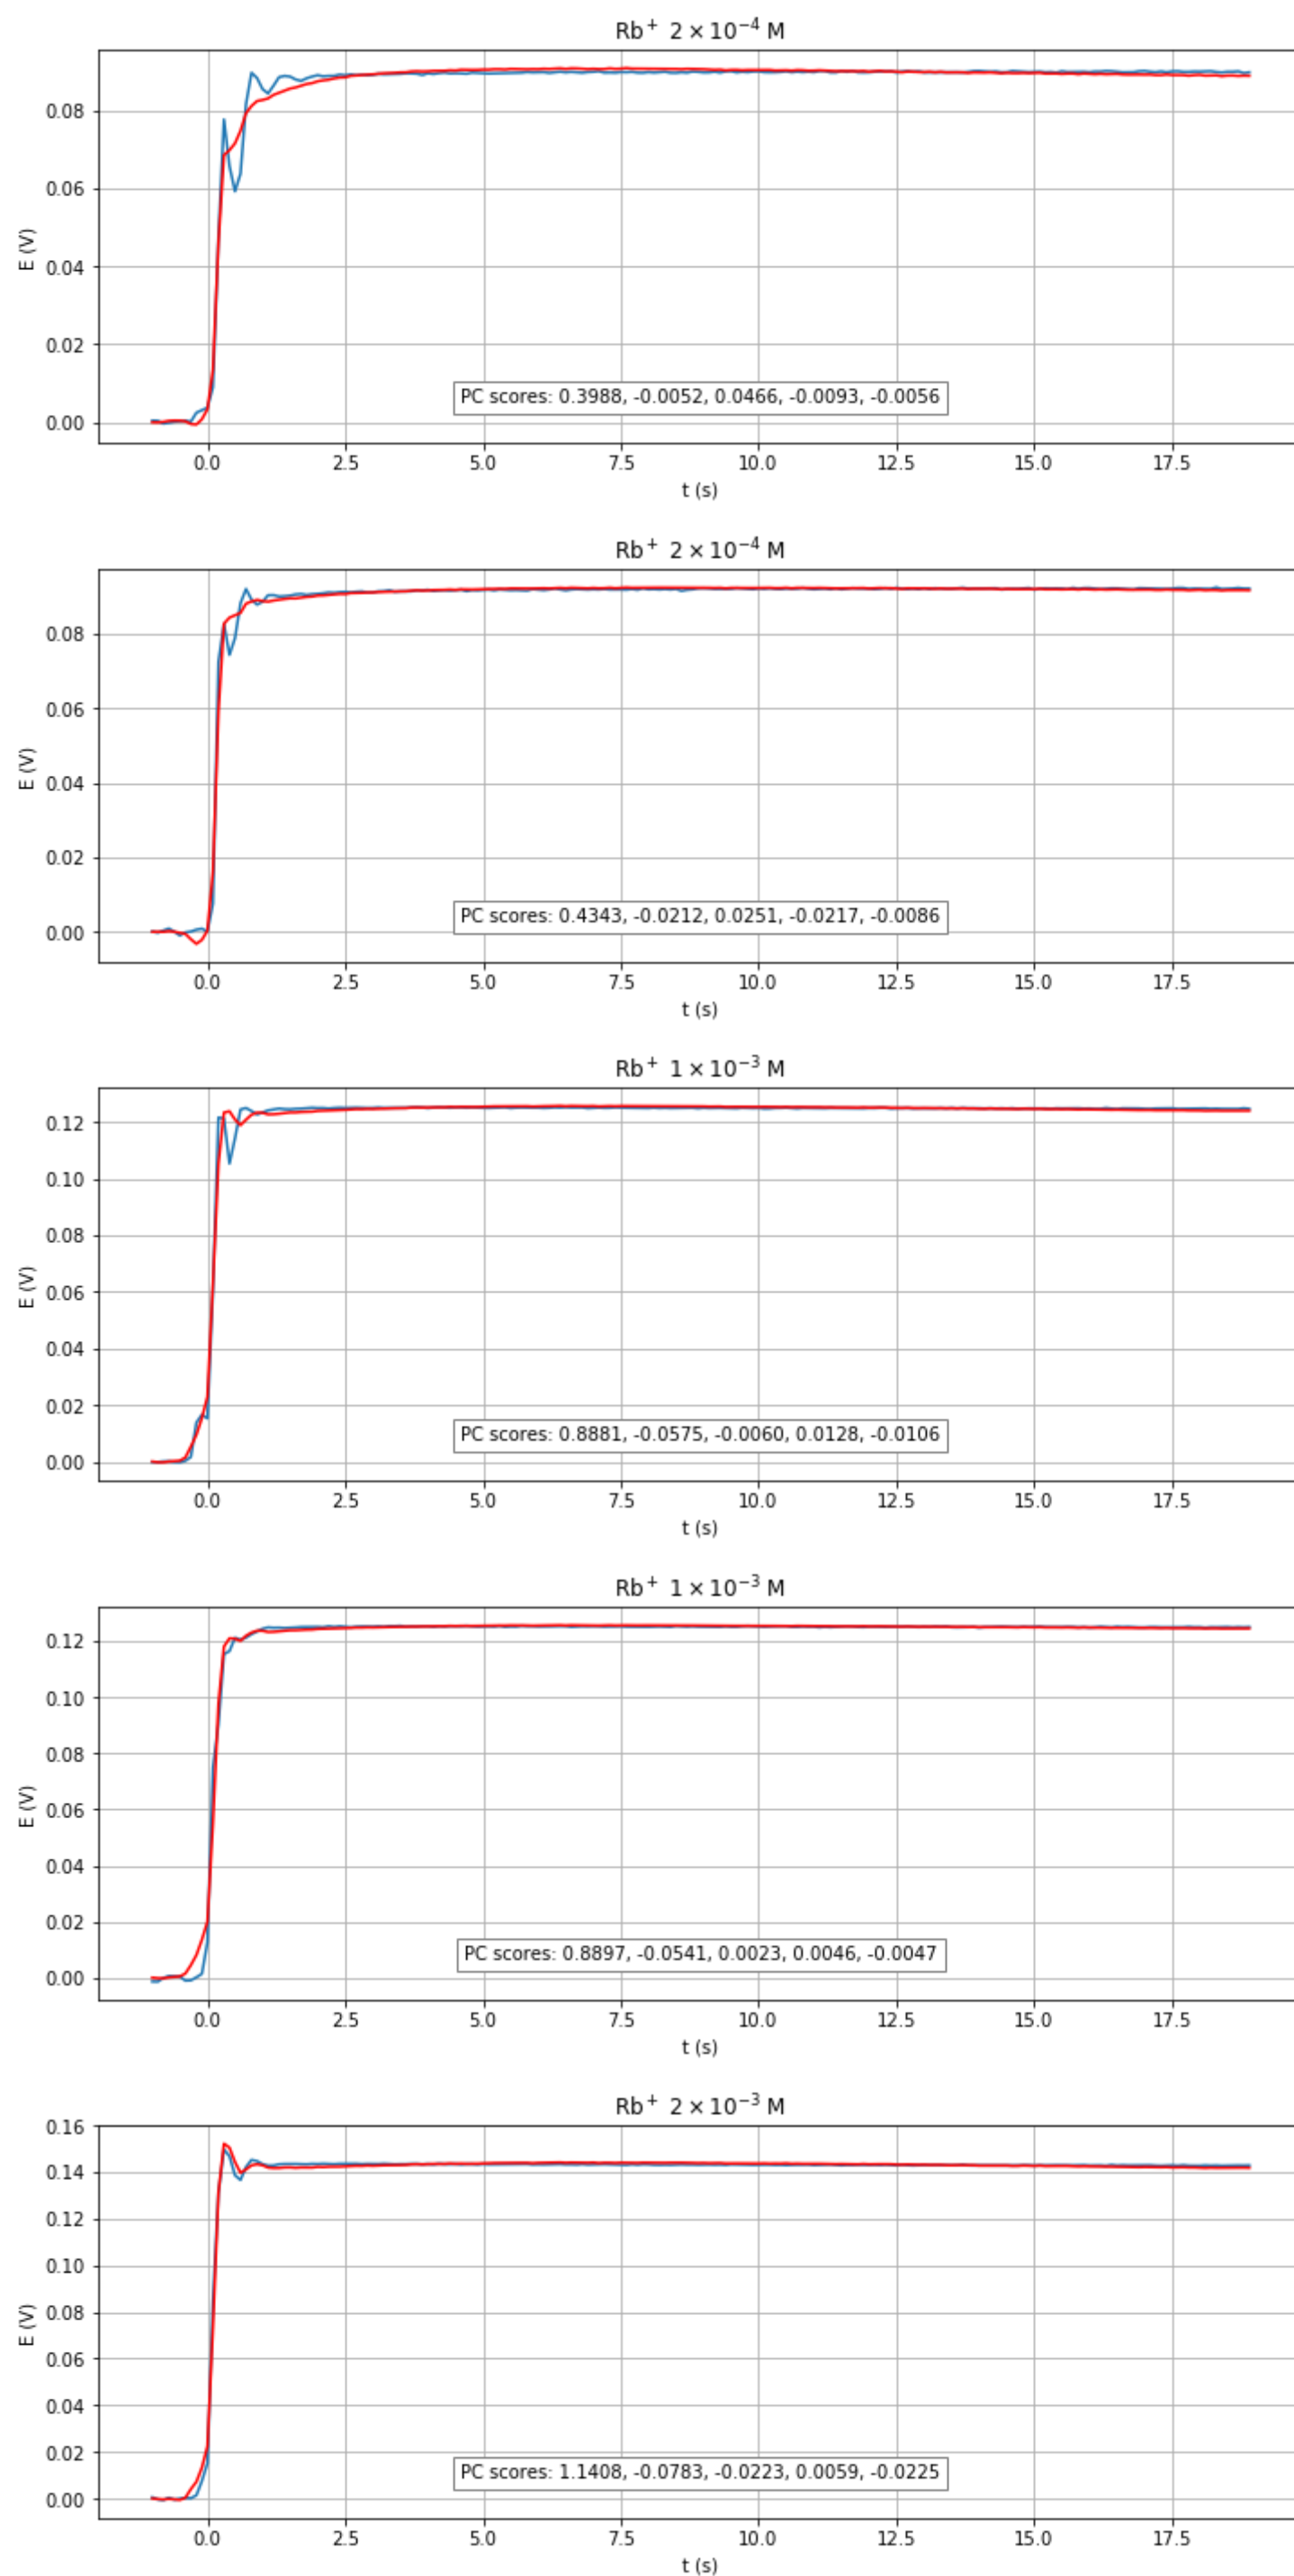

**Figure S1.** Transient potential signals obtained for individual cations and mixtures (blue) and their corresponding reconstructed signals superimposed (red). (Continued).



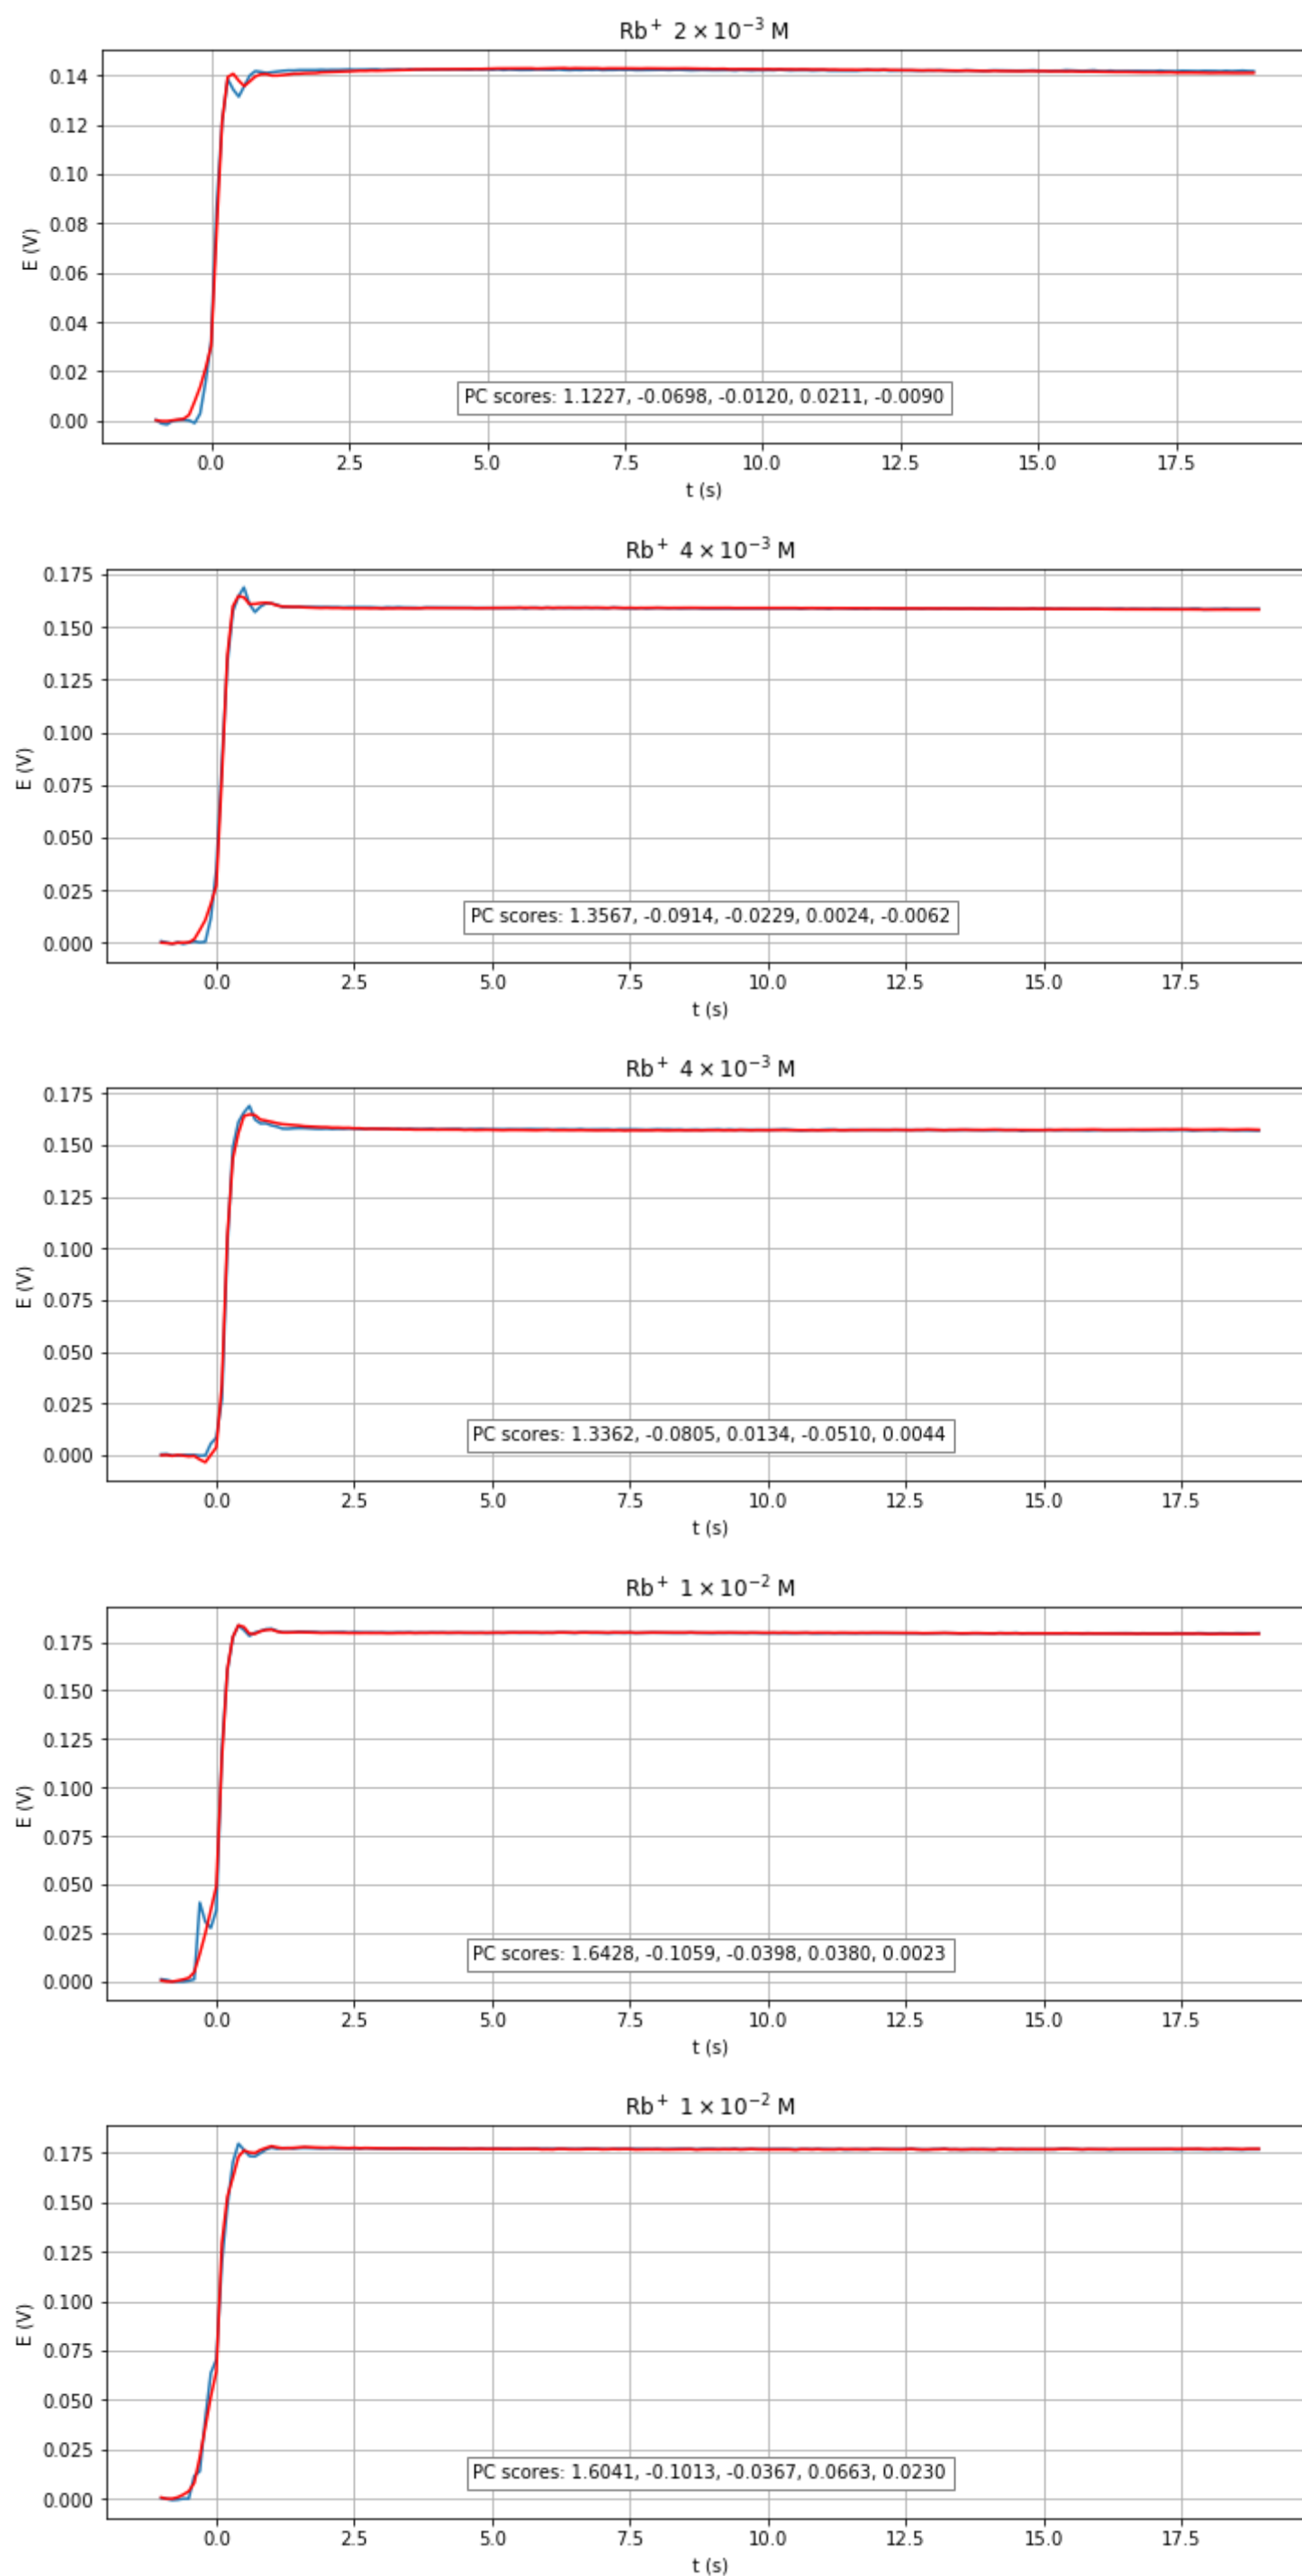

**Figure S1.** Transient potential signals obtained for individual cations and mixtures (blue) and their corresponding reconstructed signals superimposed (red). (Continued).

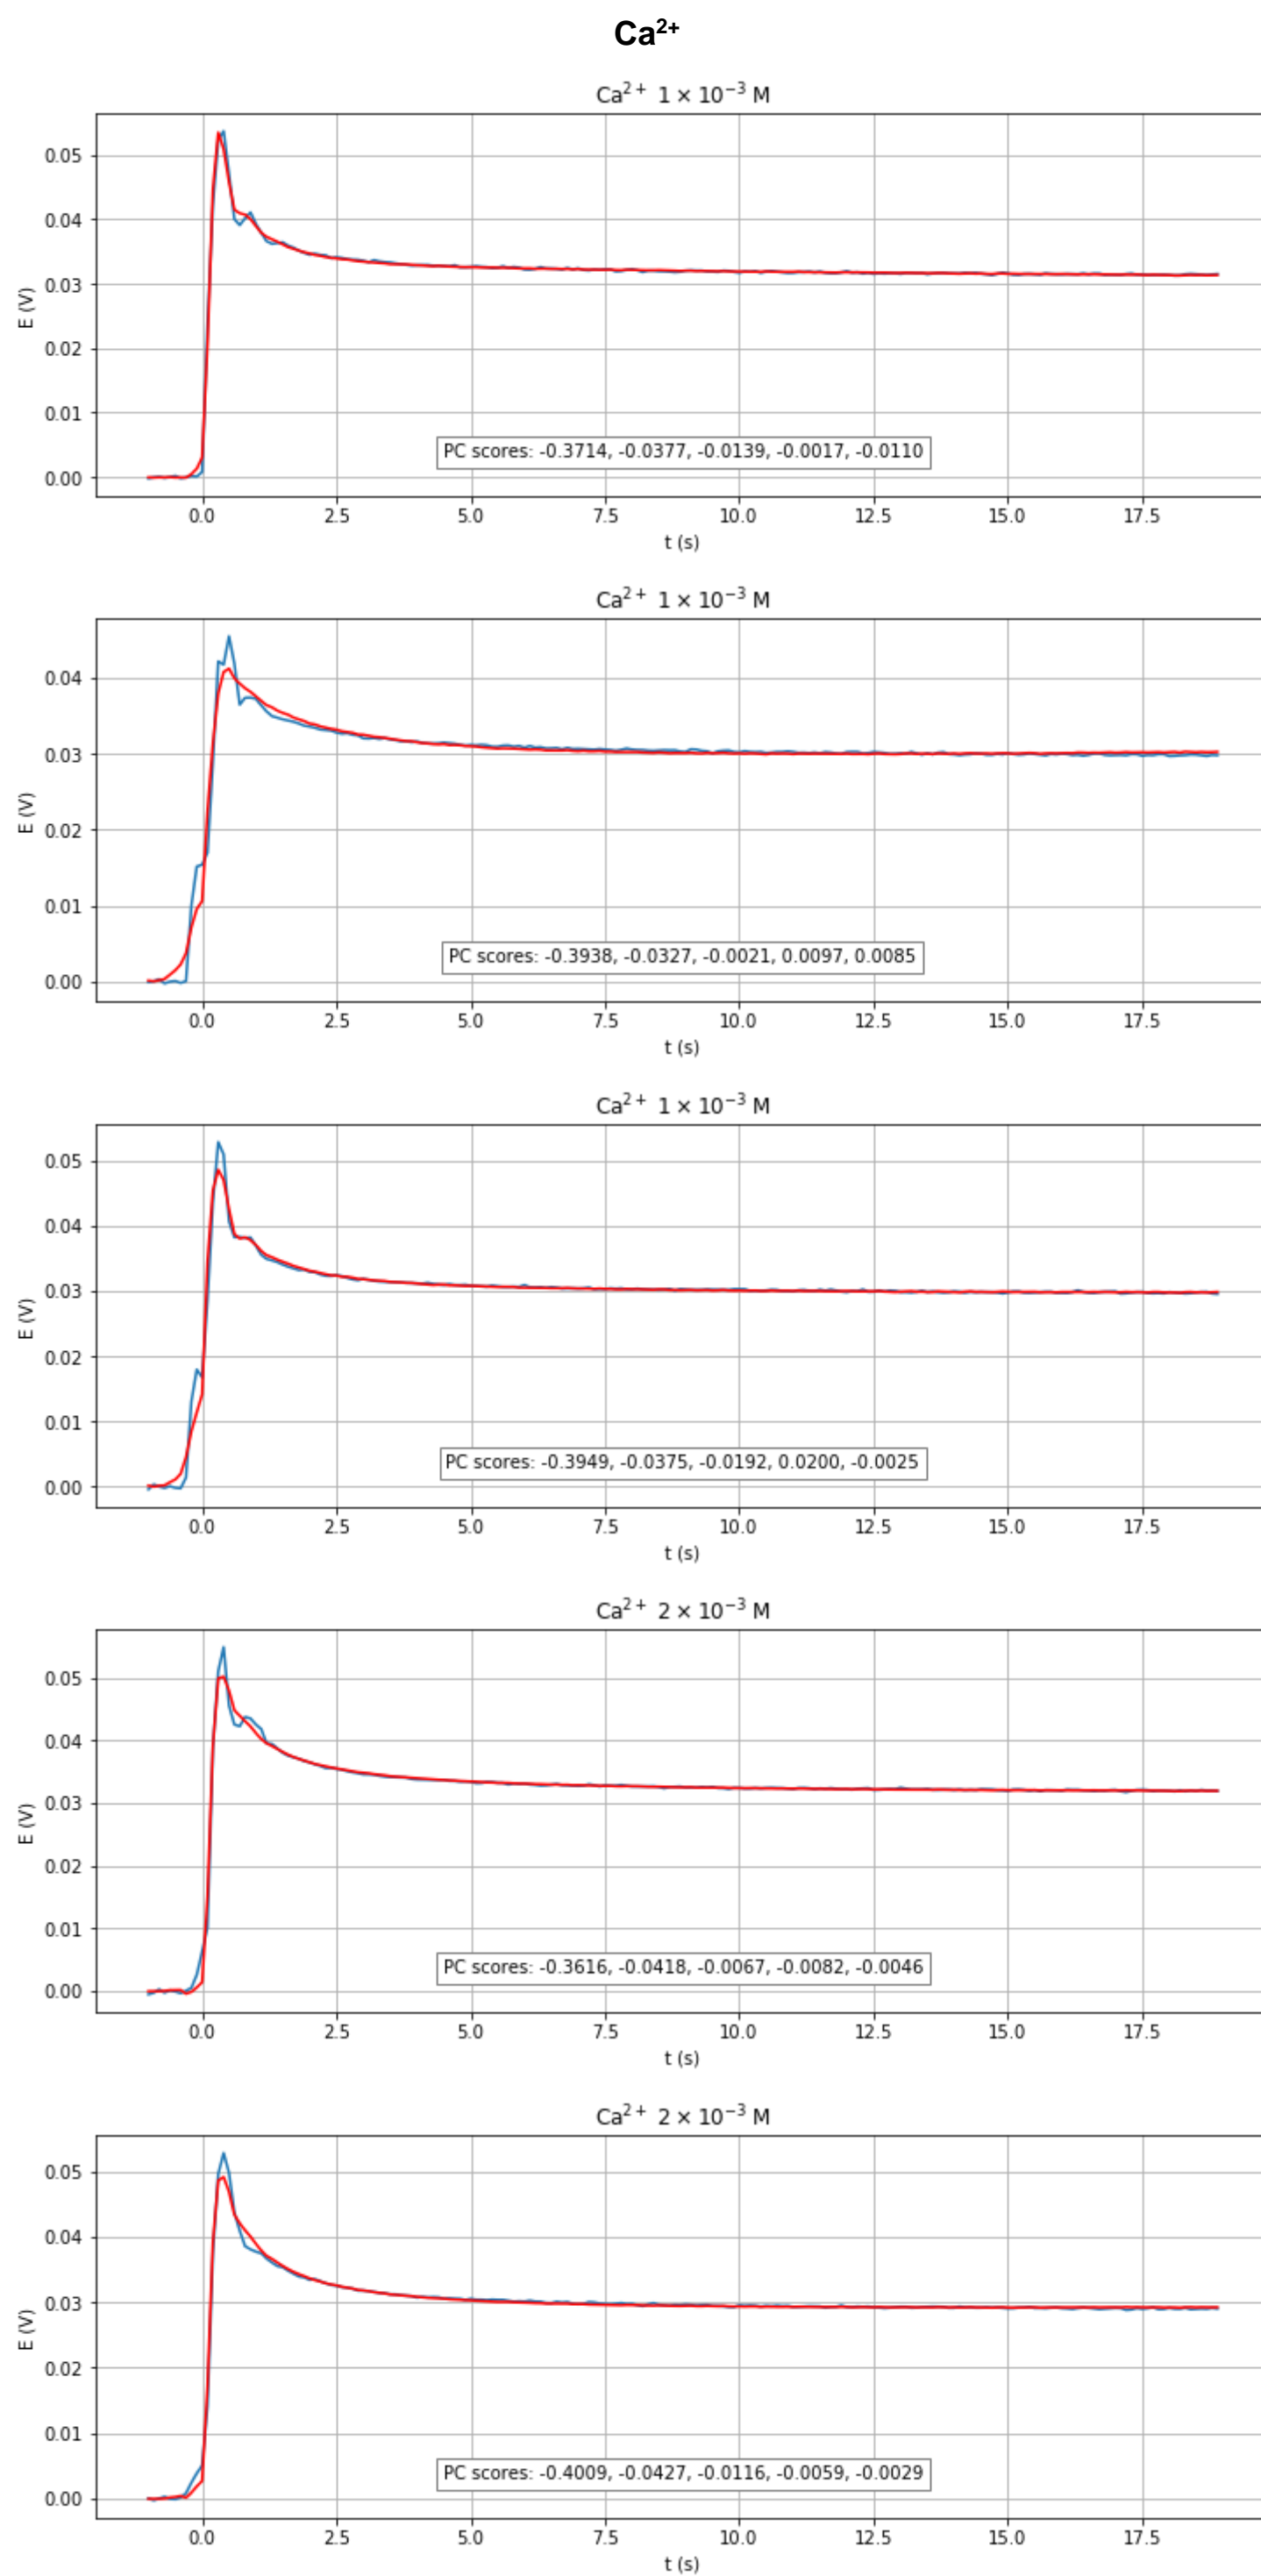

**Figure S1.** Transient potential signals obtained for individual cations and mixtures (blue) and their corresponding reconstructed signals superimposed (red). (Continued)

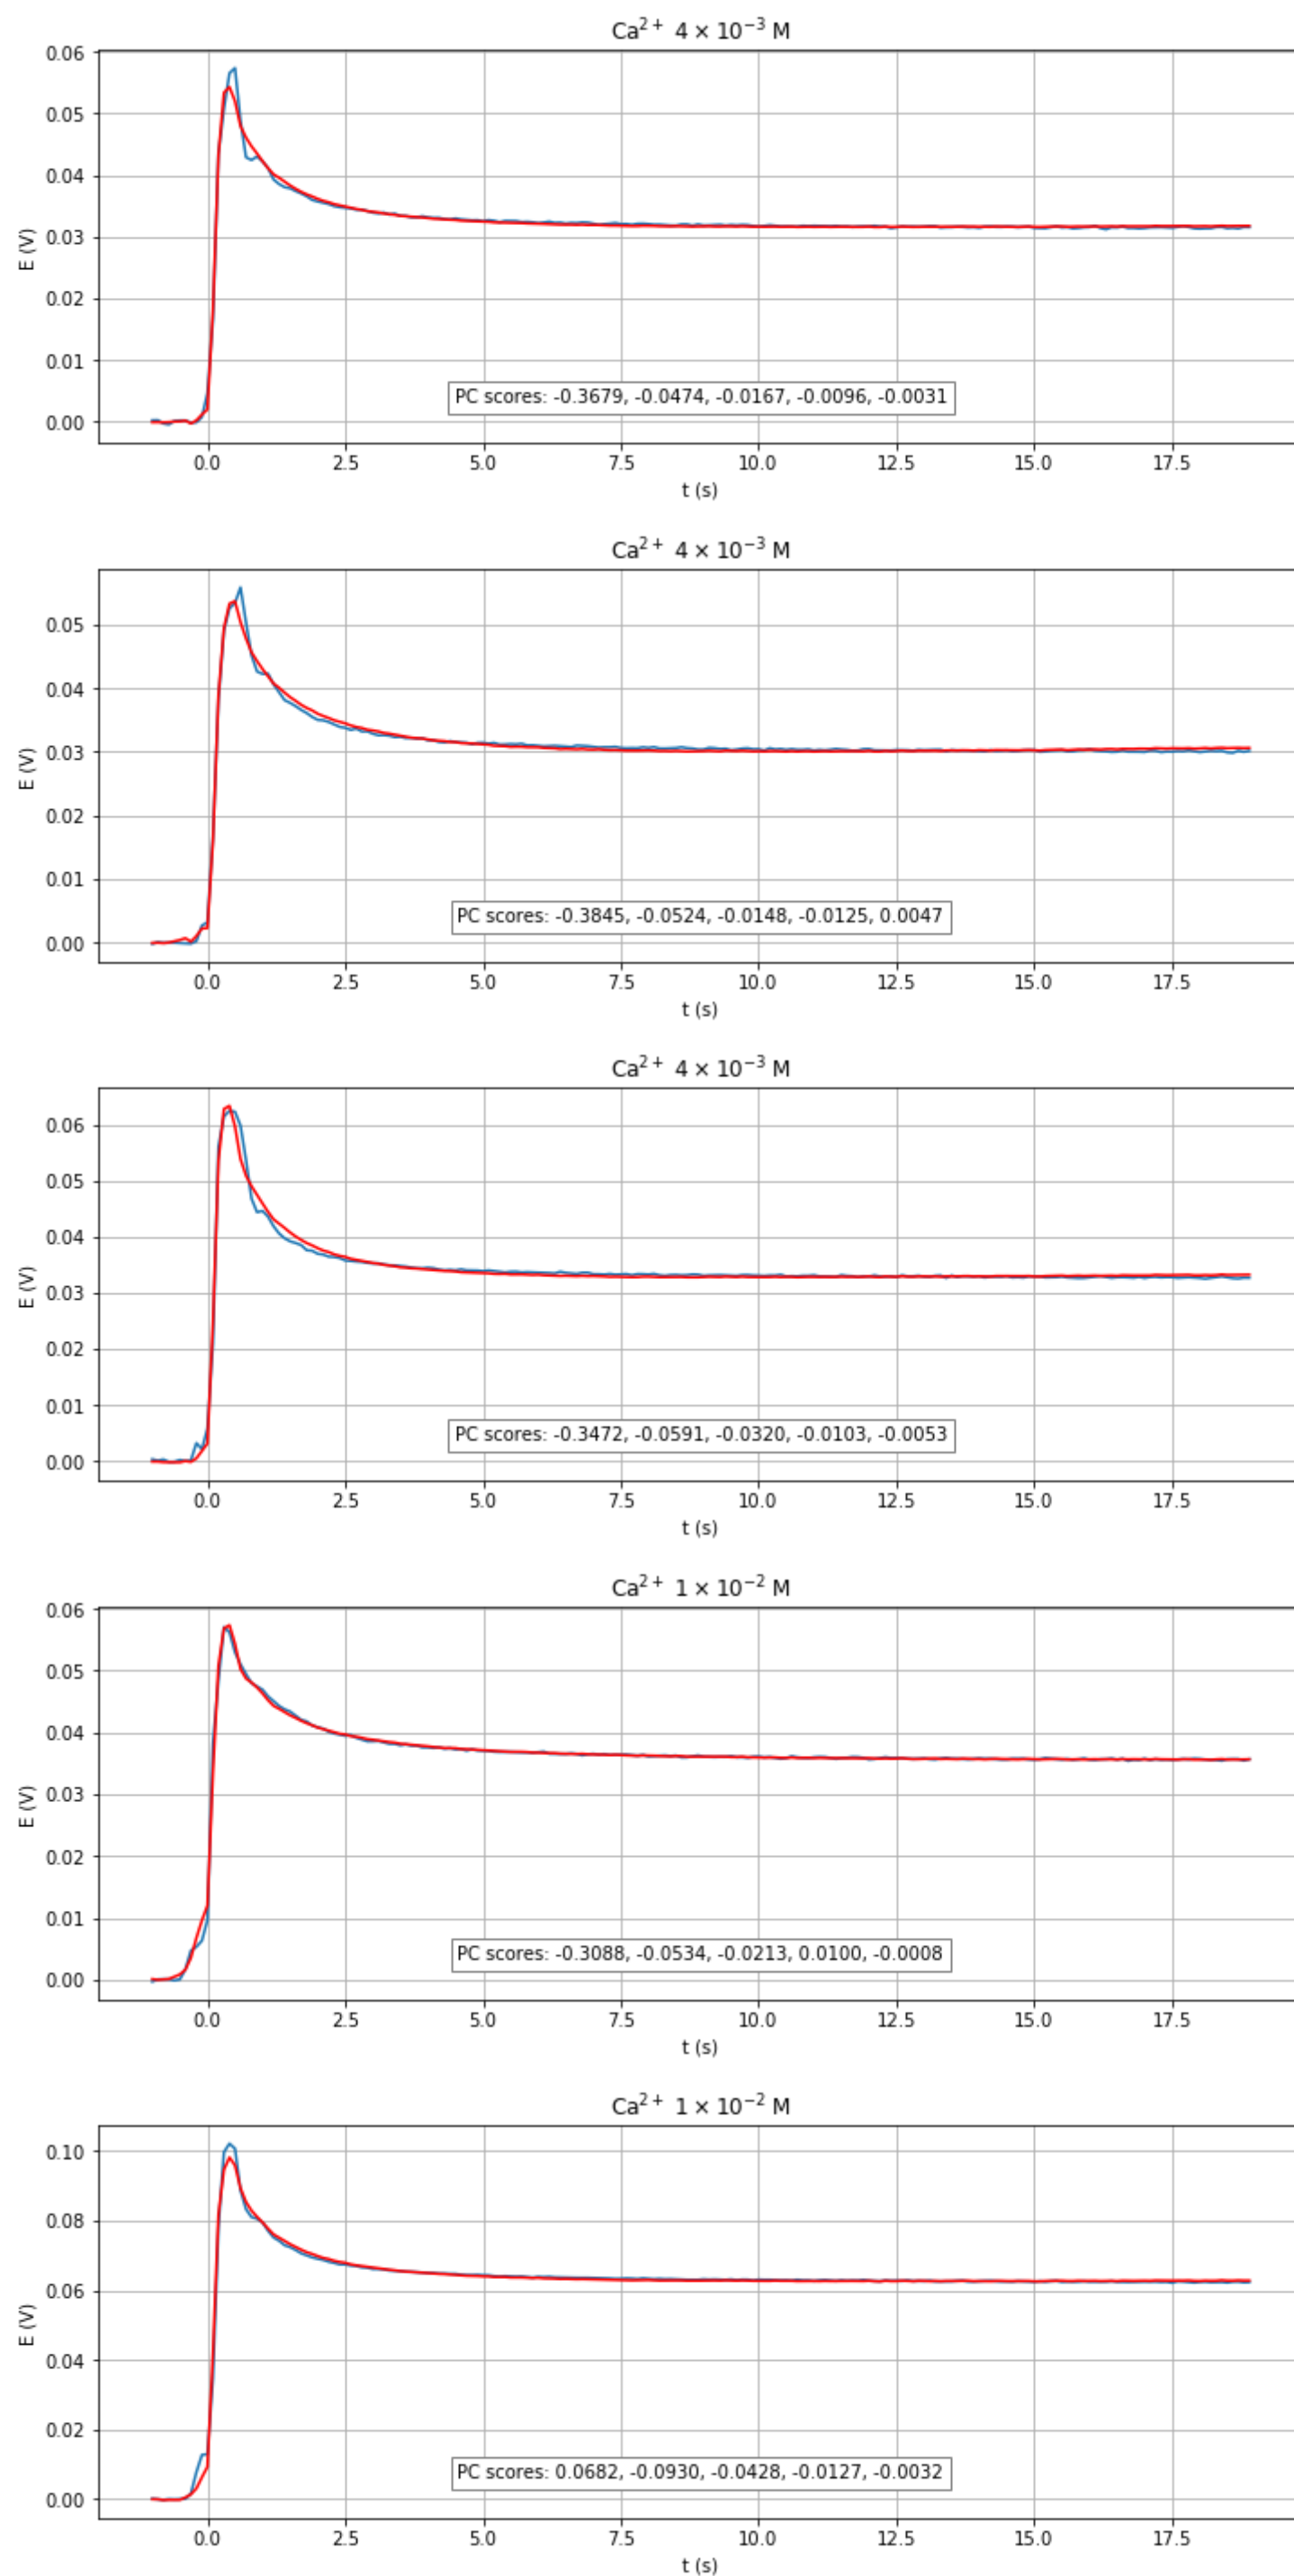

**Figure S1.** Transient potential signals obtained for individual cations and mixtures (blue) and their corresponding reconstructed signals superimposed (red). (Continued)

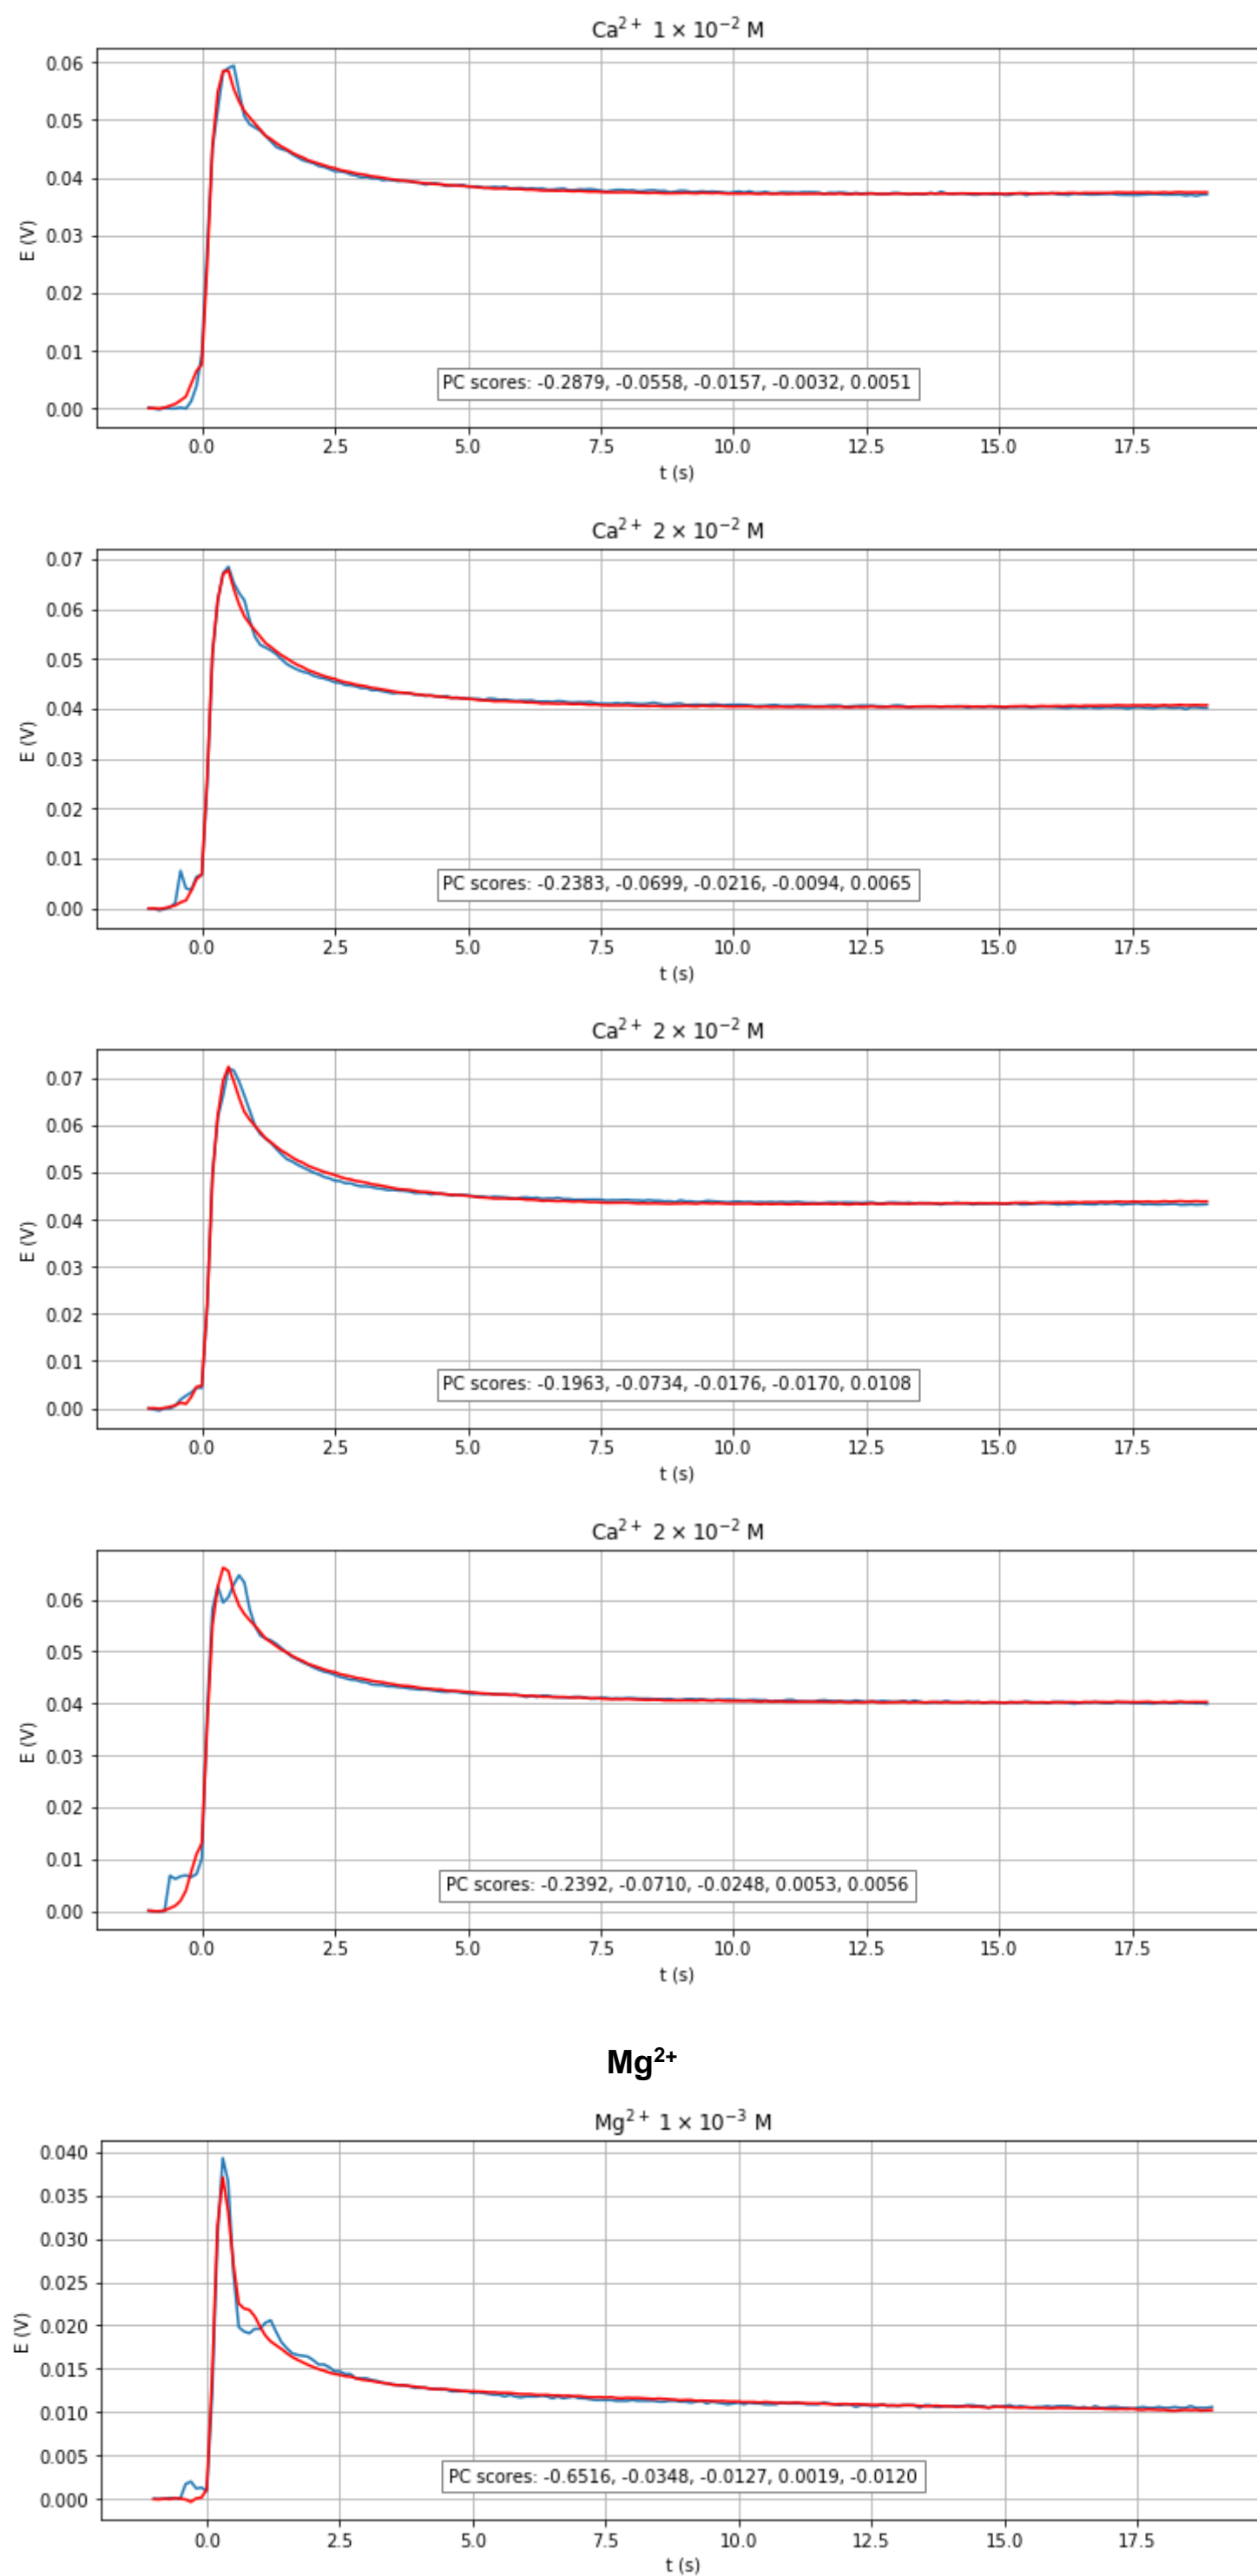

**Figure S1.** Transient potential signals obtained for individual cations and mixtures (blue) and their corresponding reconstructed signals superimposed (red). (Continued)

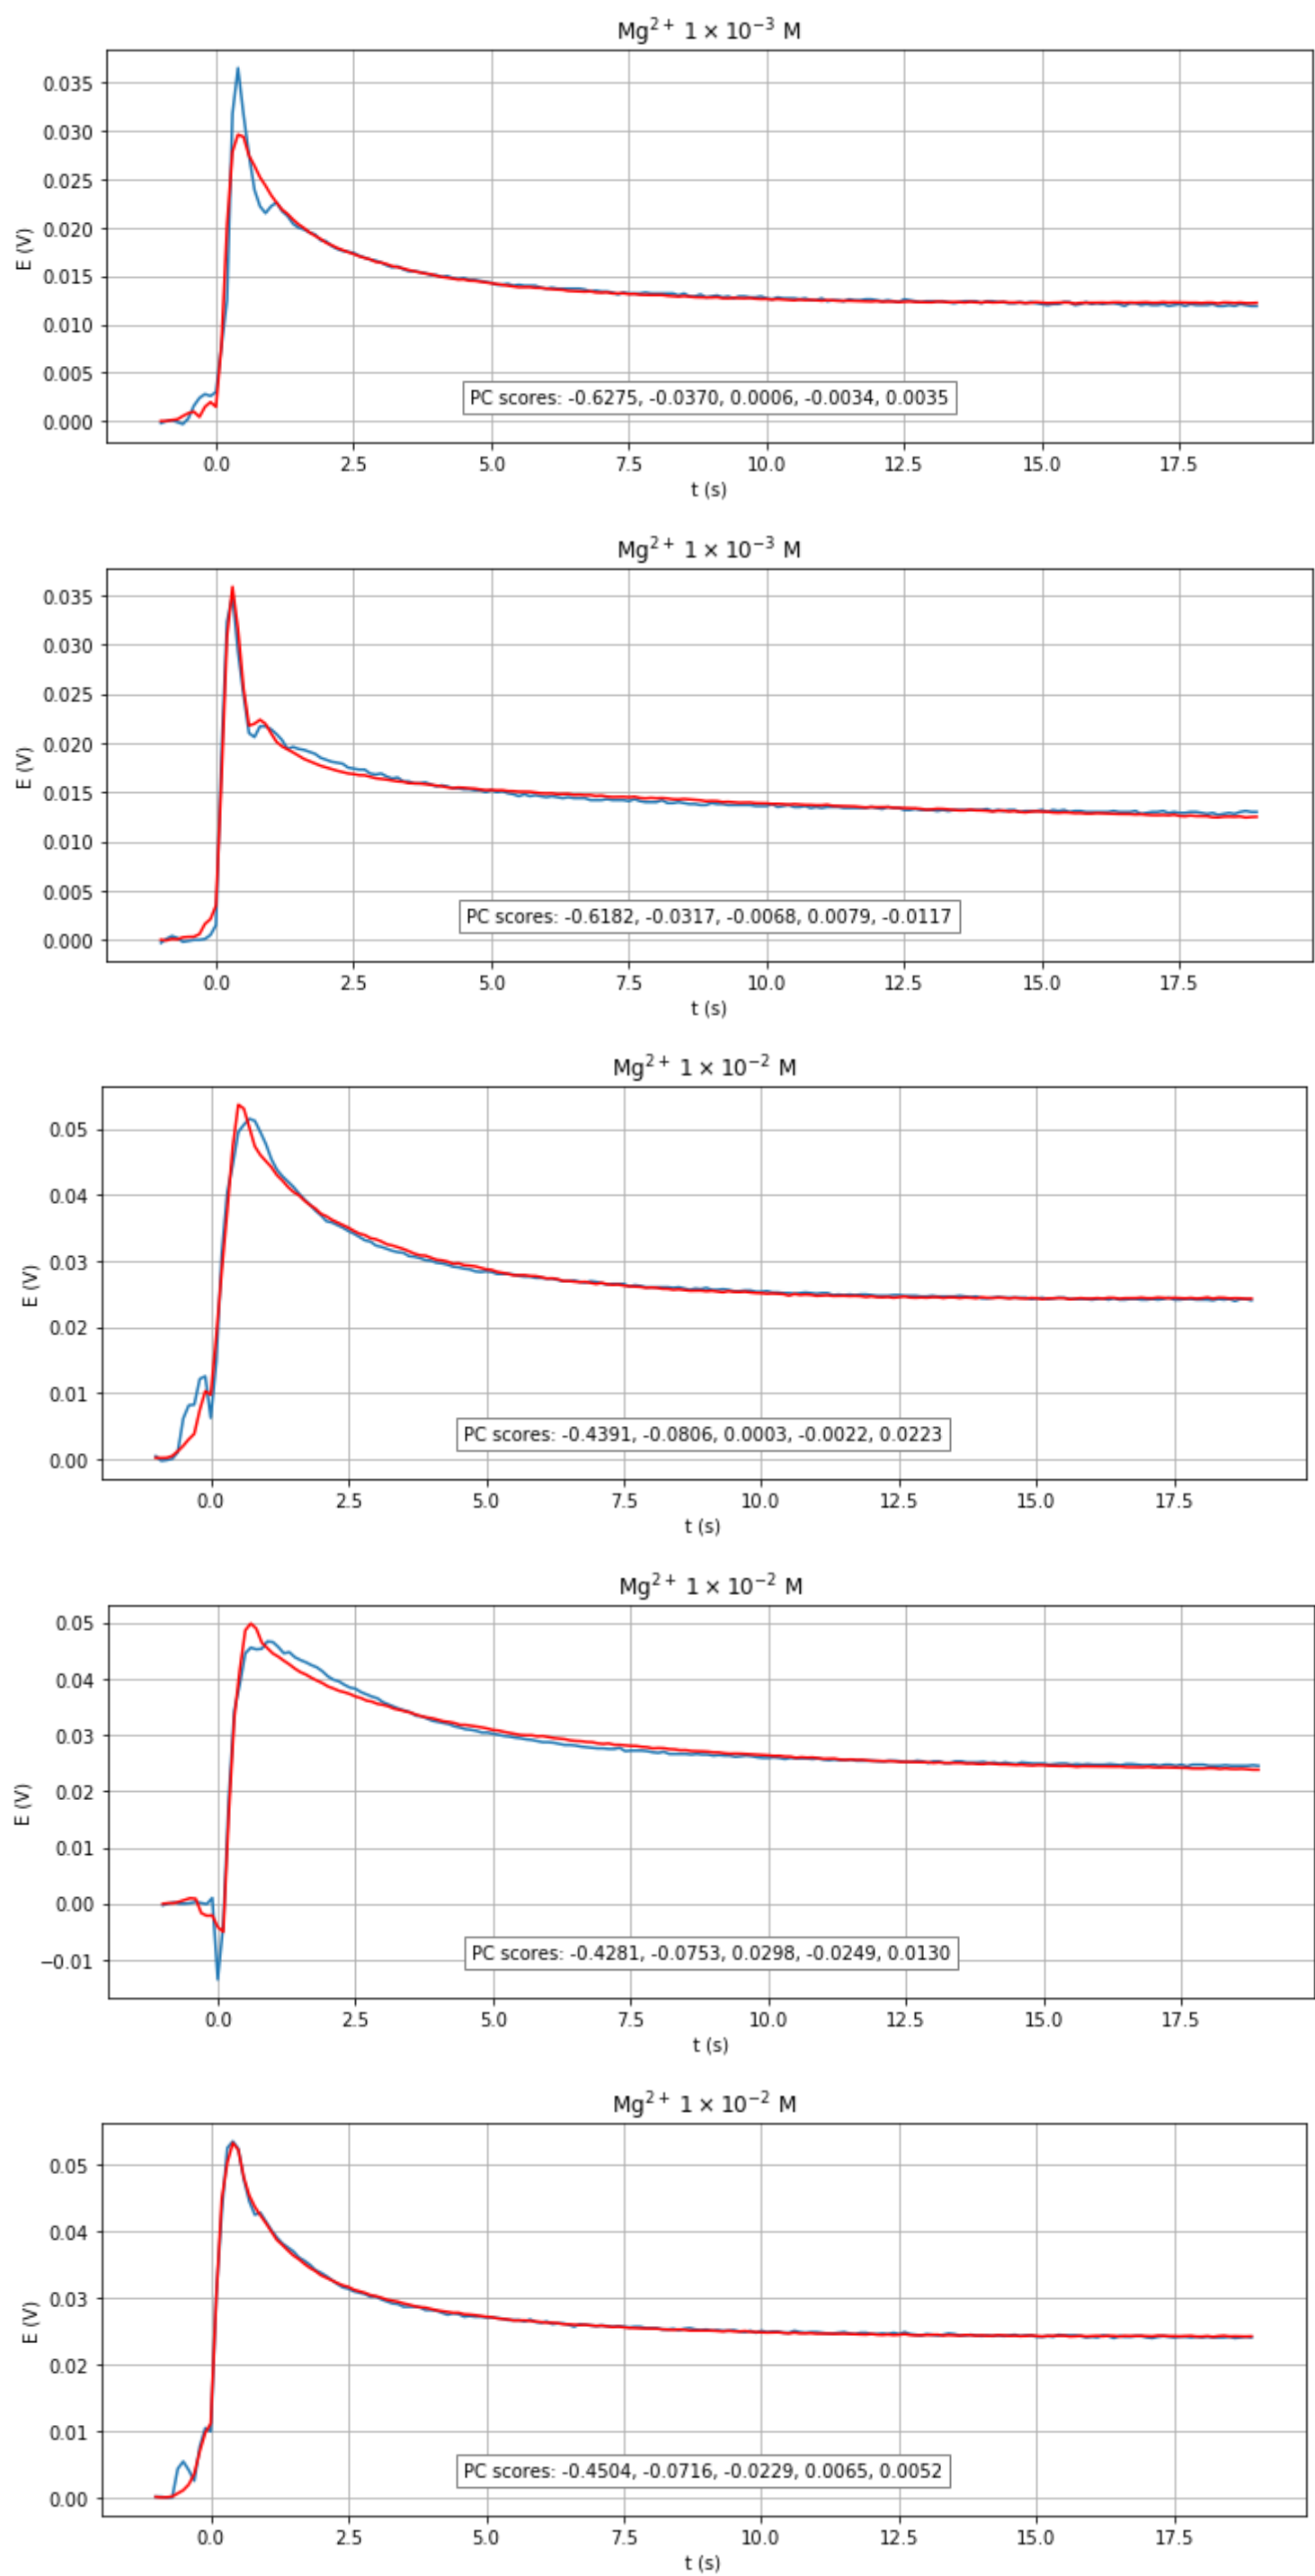

**Figure S1.** Transient potential signals obtained for individual cations and mixtures (blue) and their corresponding reconstructed signals superimposed (red). (Continued)

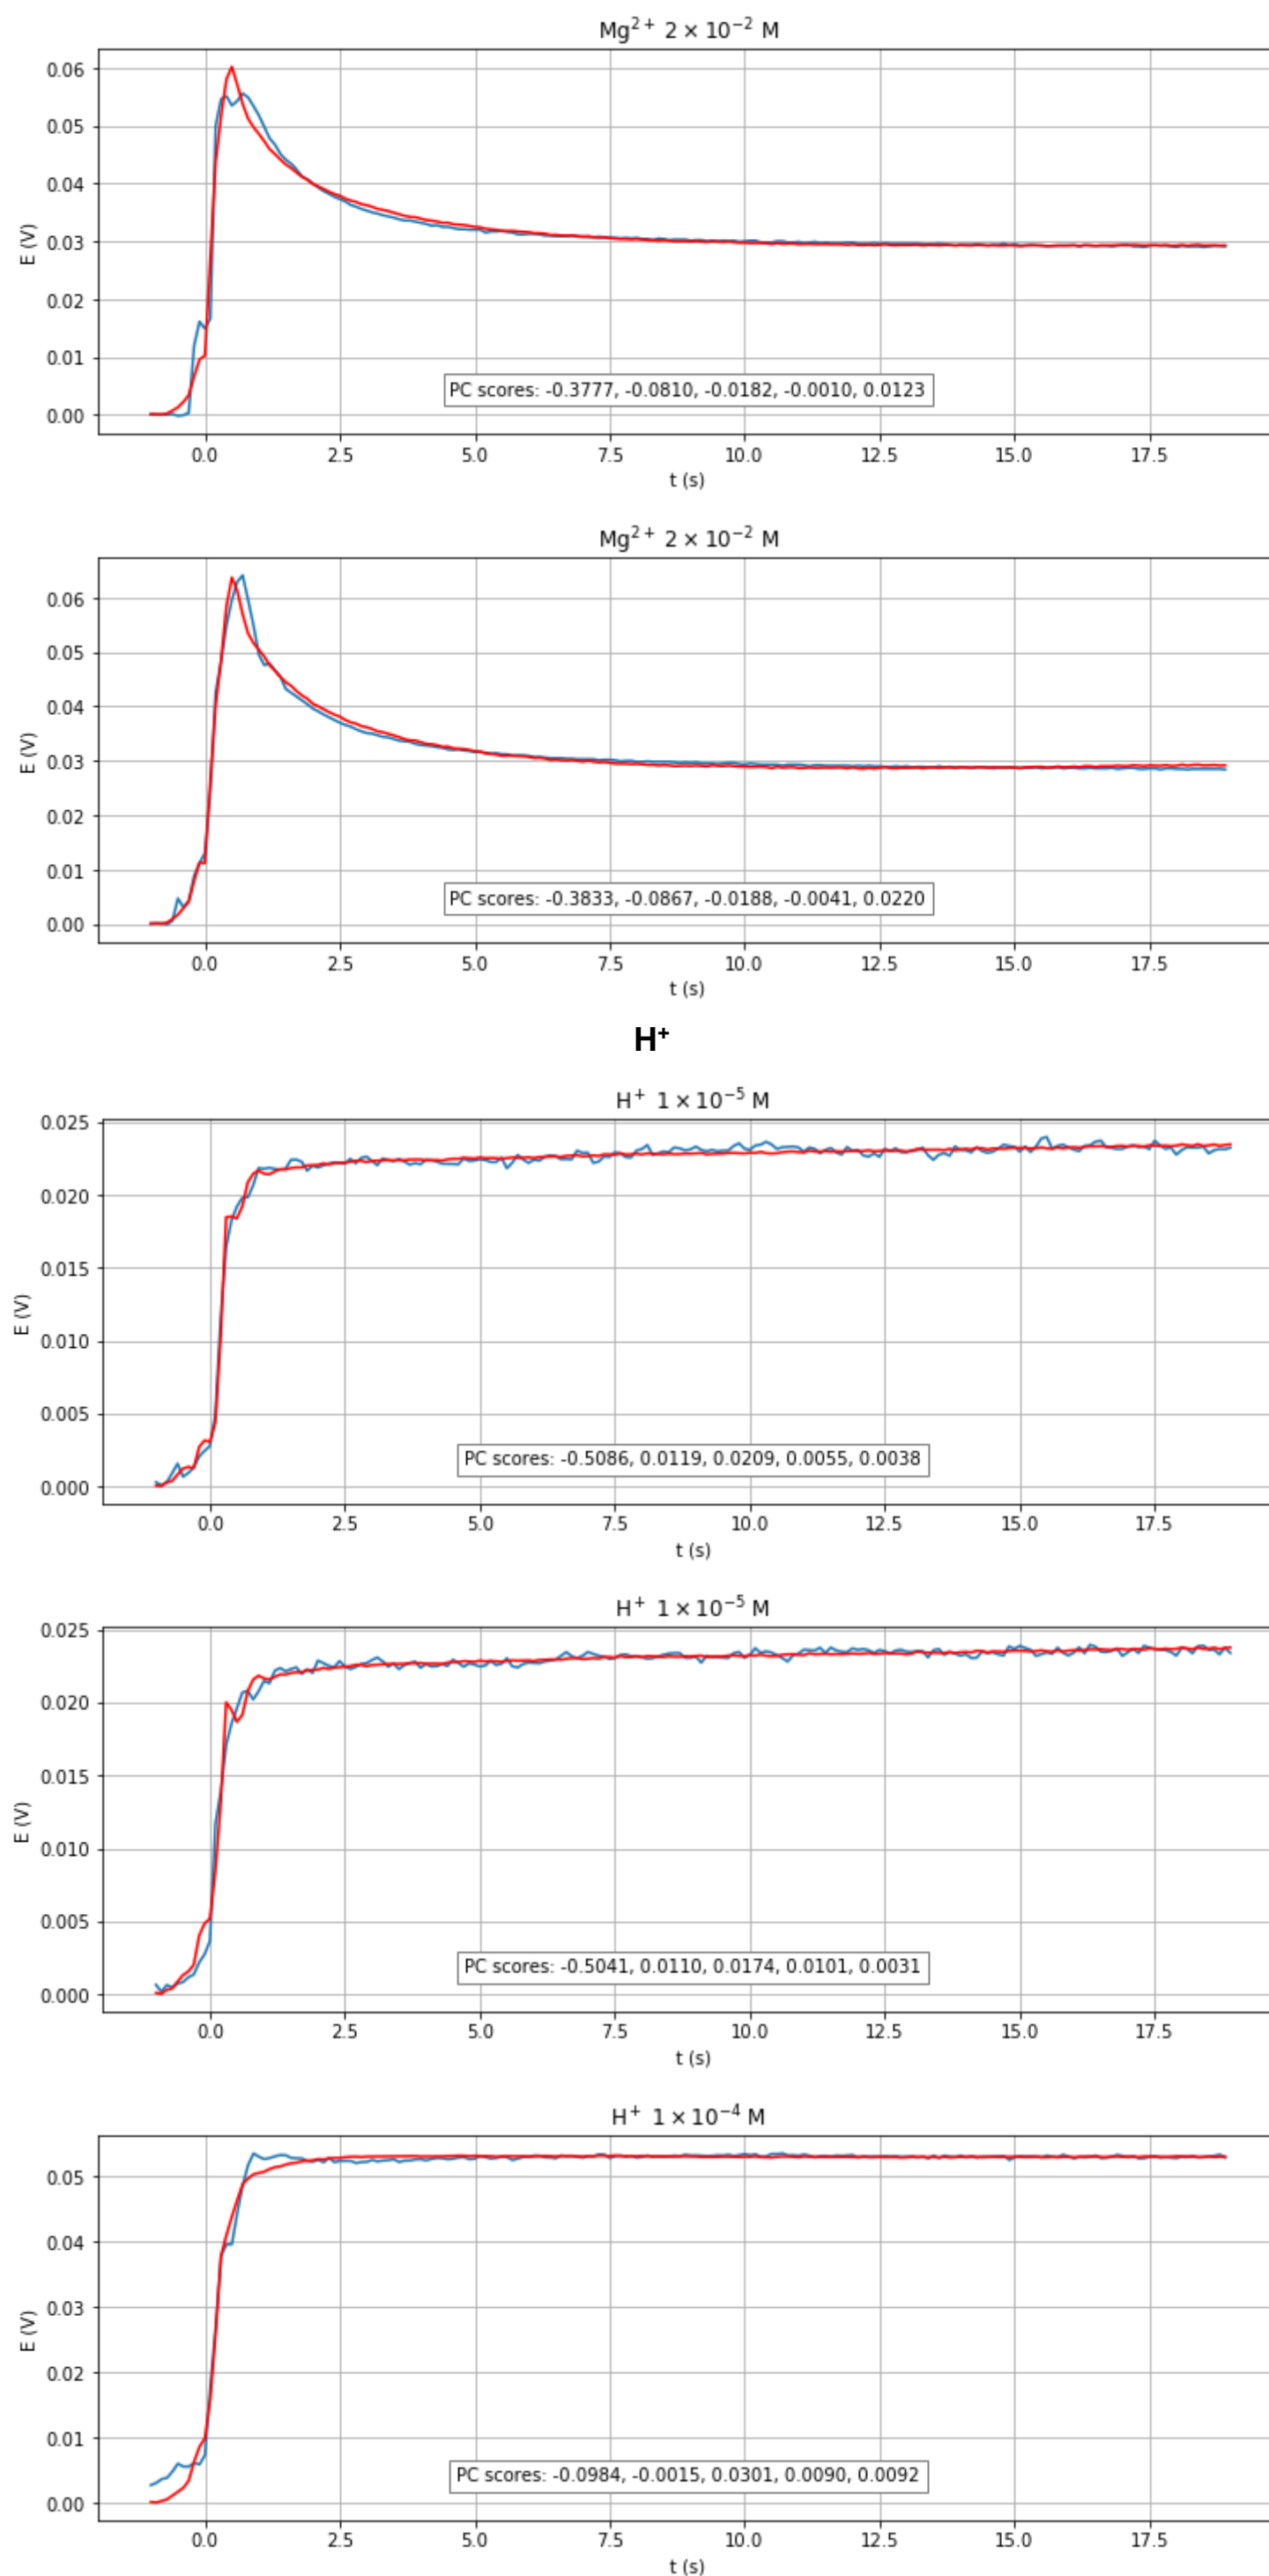

**Figure S1.** Transient potential signals obtained for individual cations and mixtures (blue) and their corresponding reconstructed signals superimposed (red). (Continued)

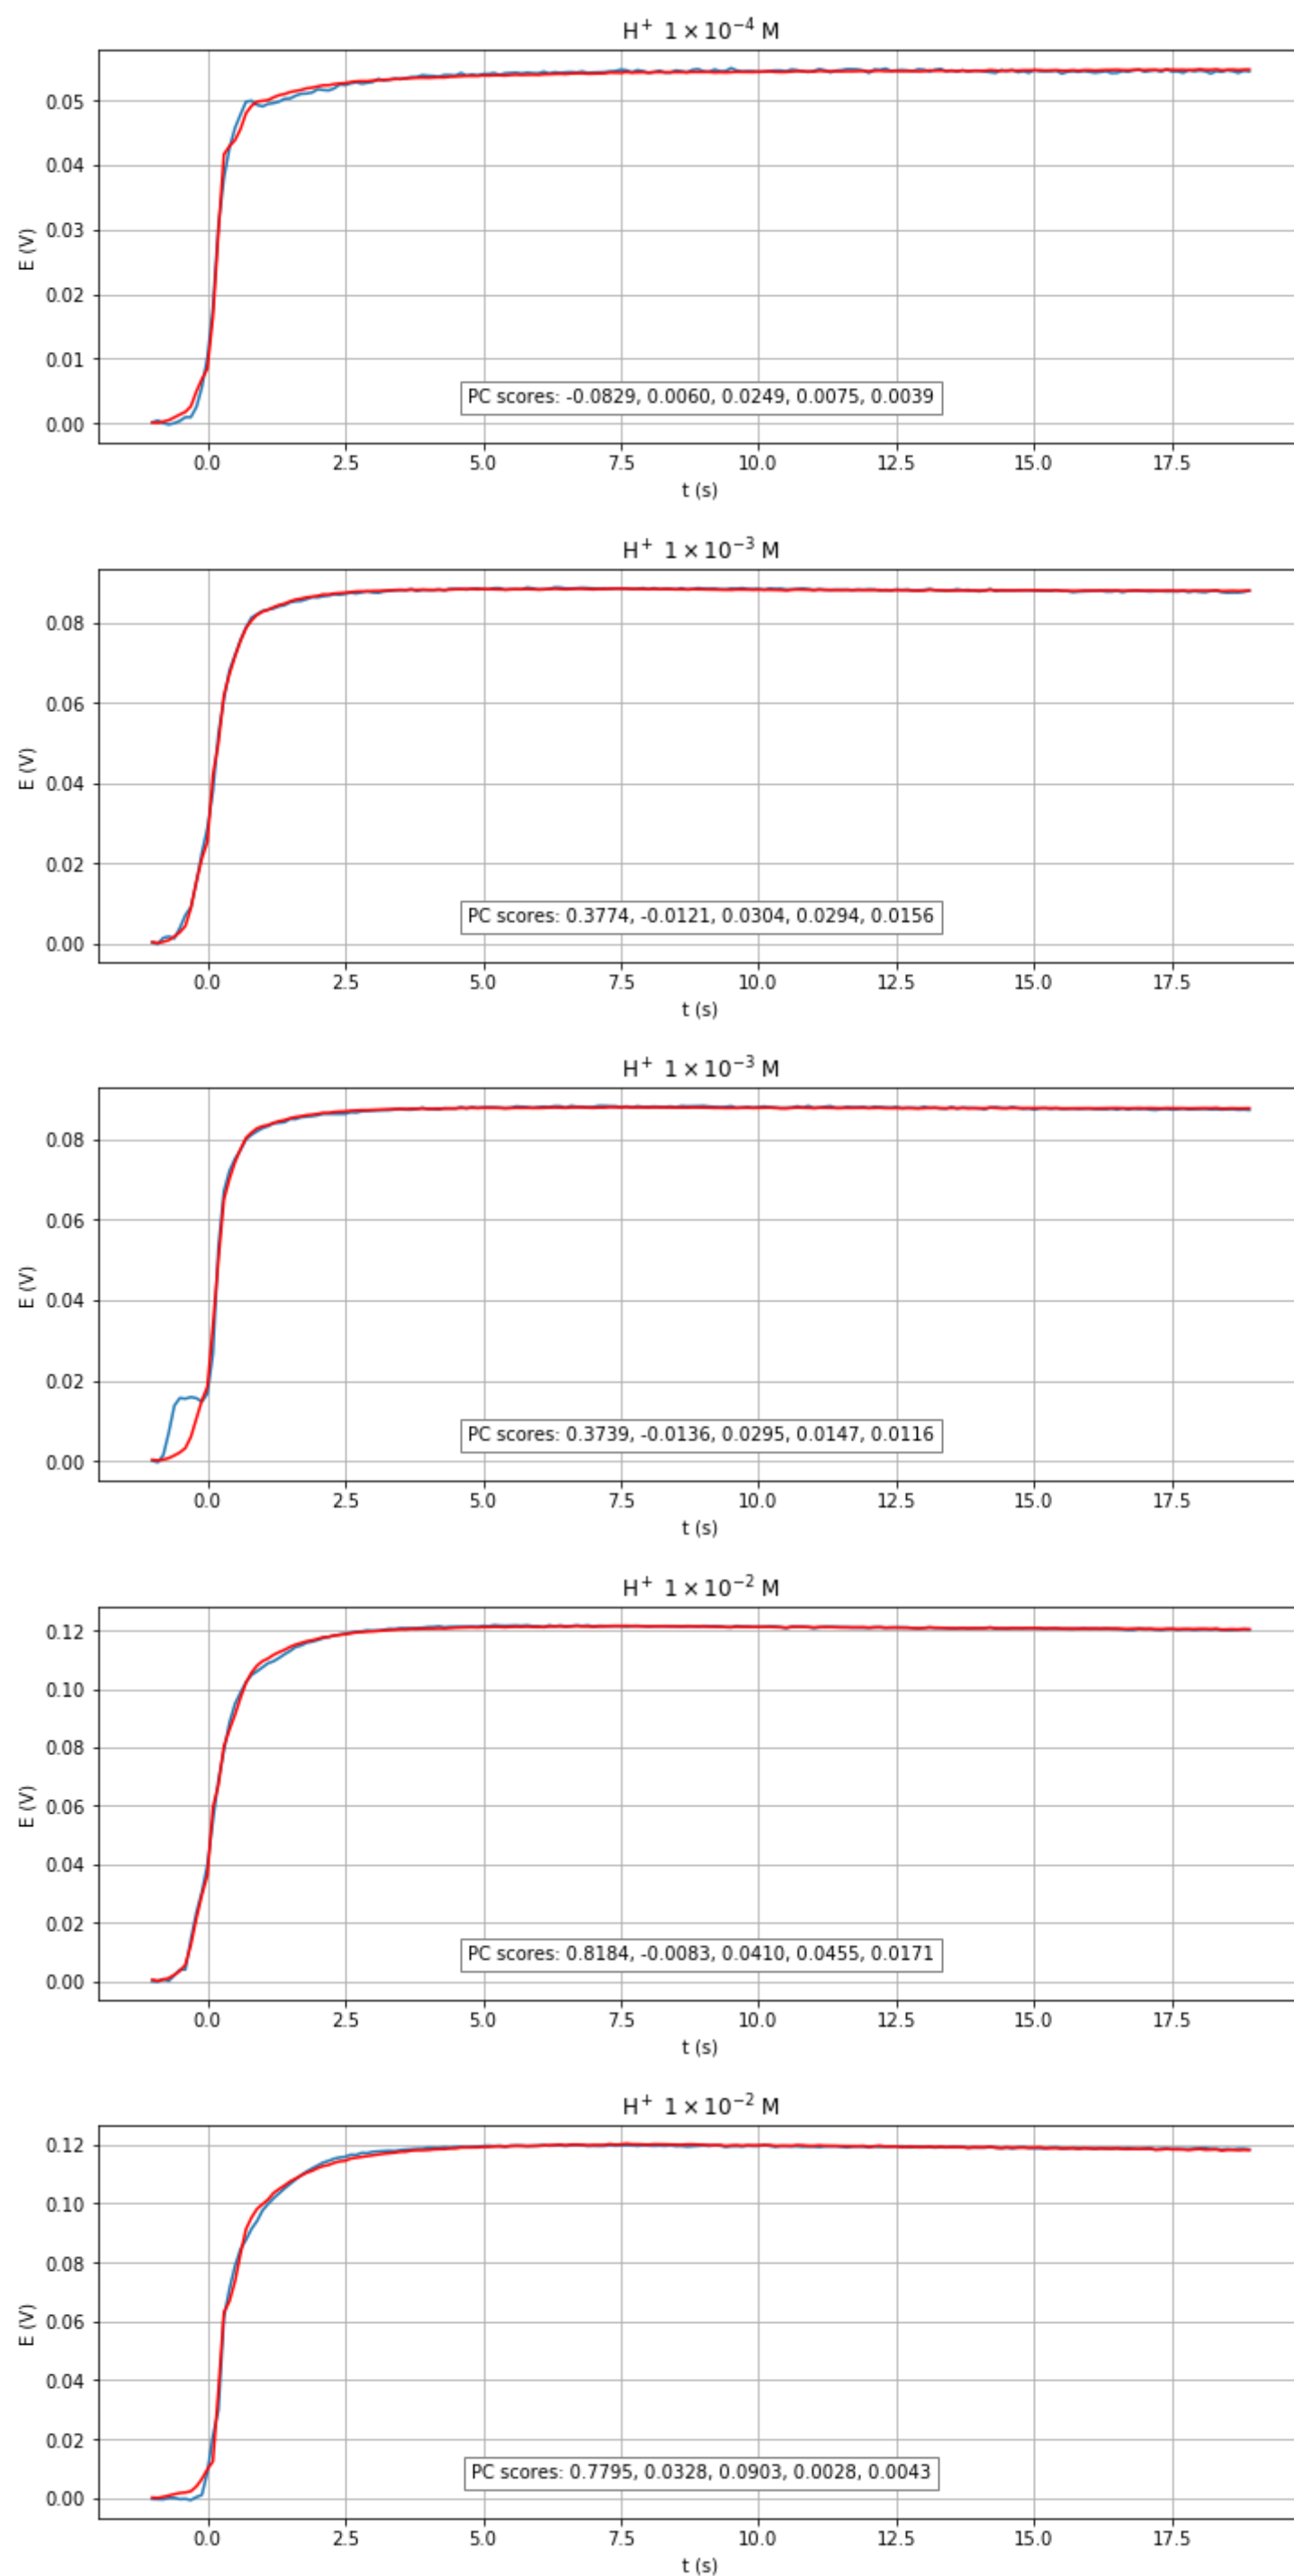

**Figure S1.** Transient potential signals obtained for individual cations and mixtures (blue) and their corresponding reconstructed signals superimposed (red). (Continued)

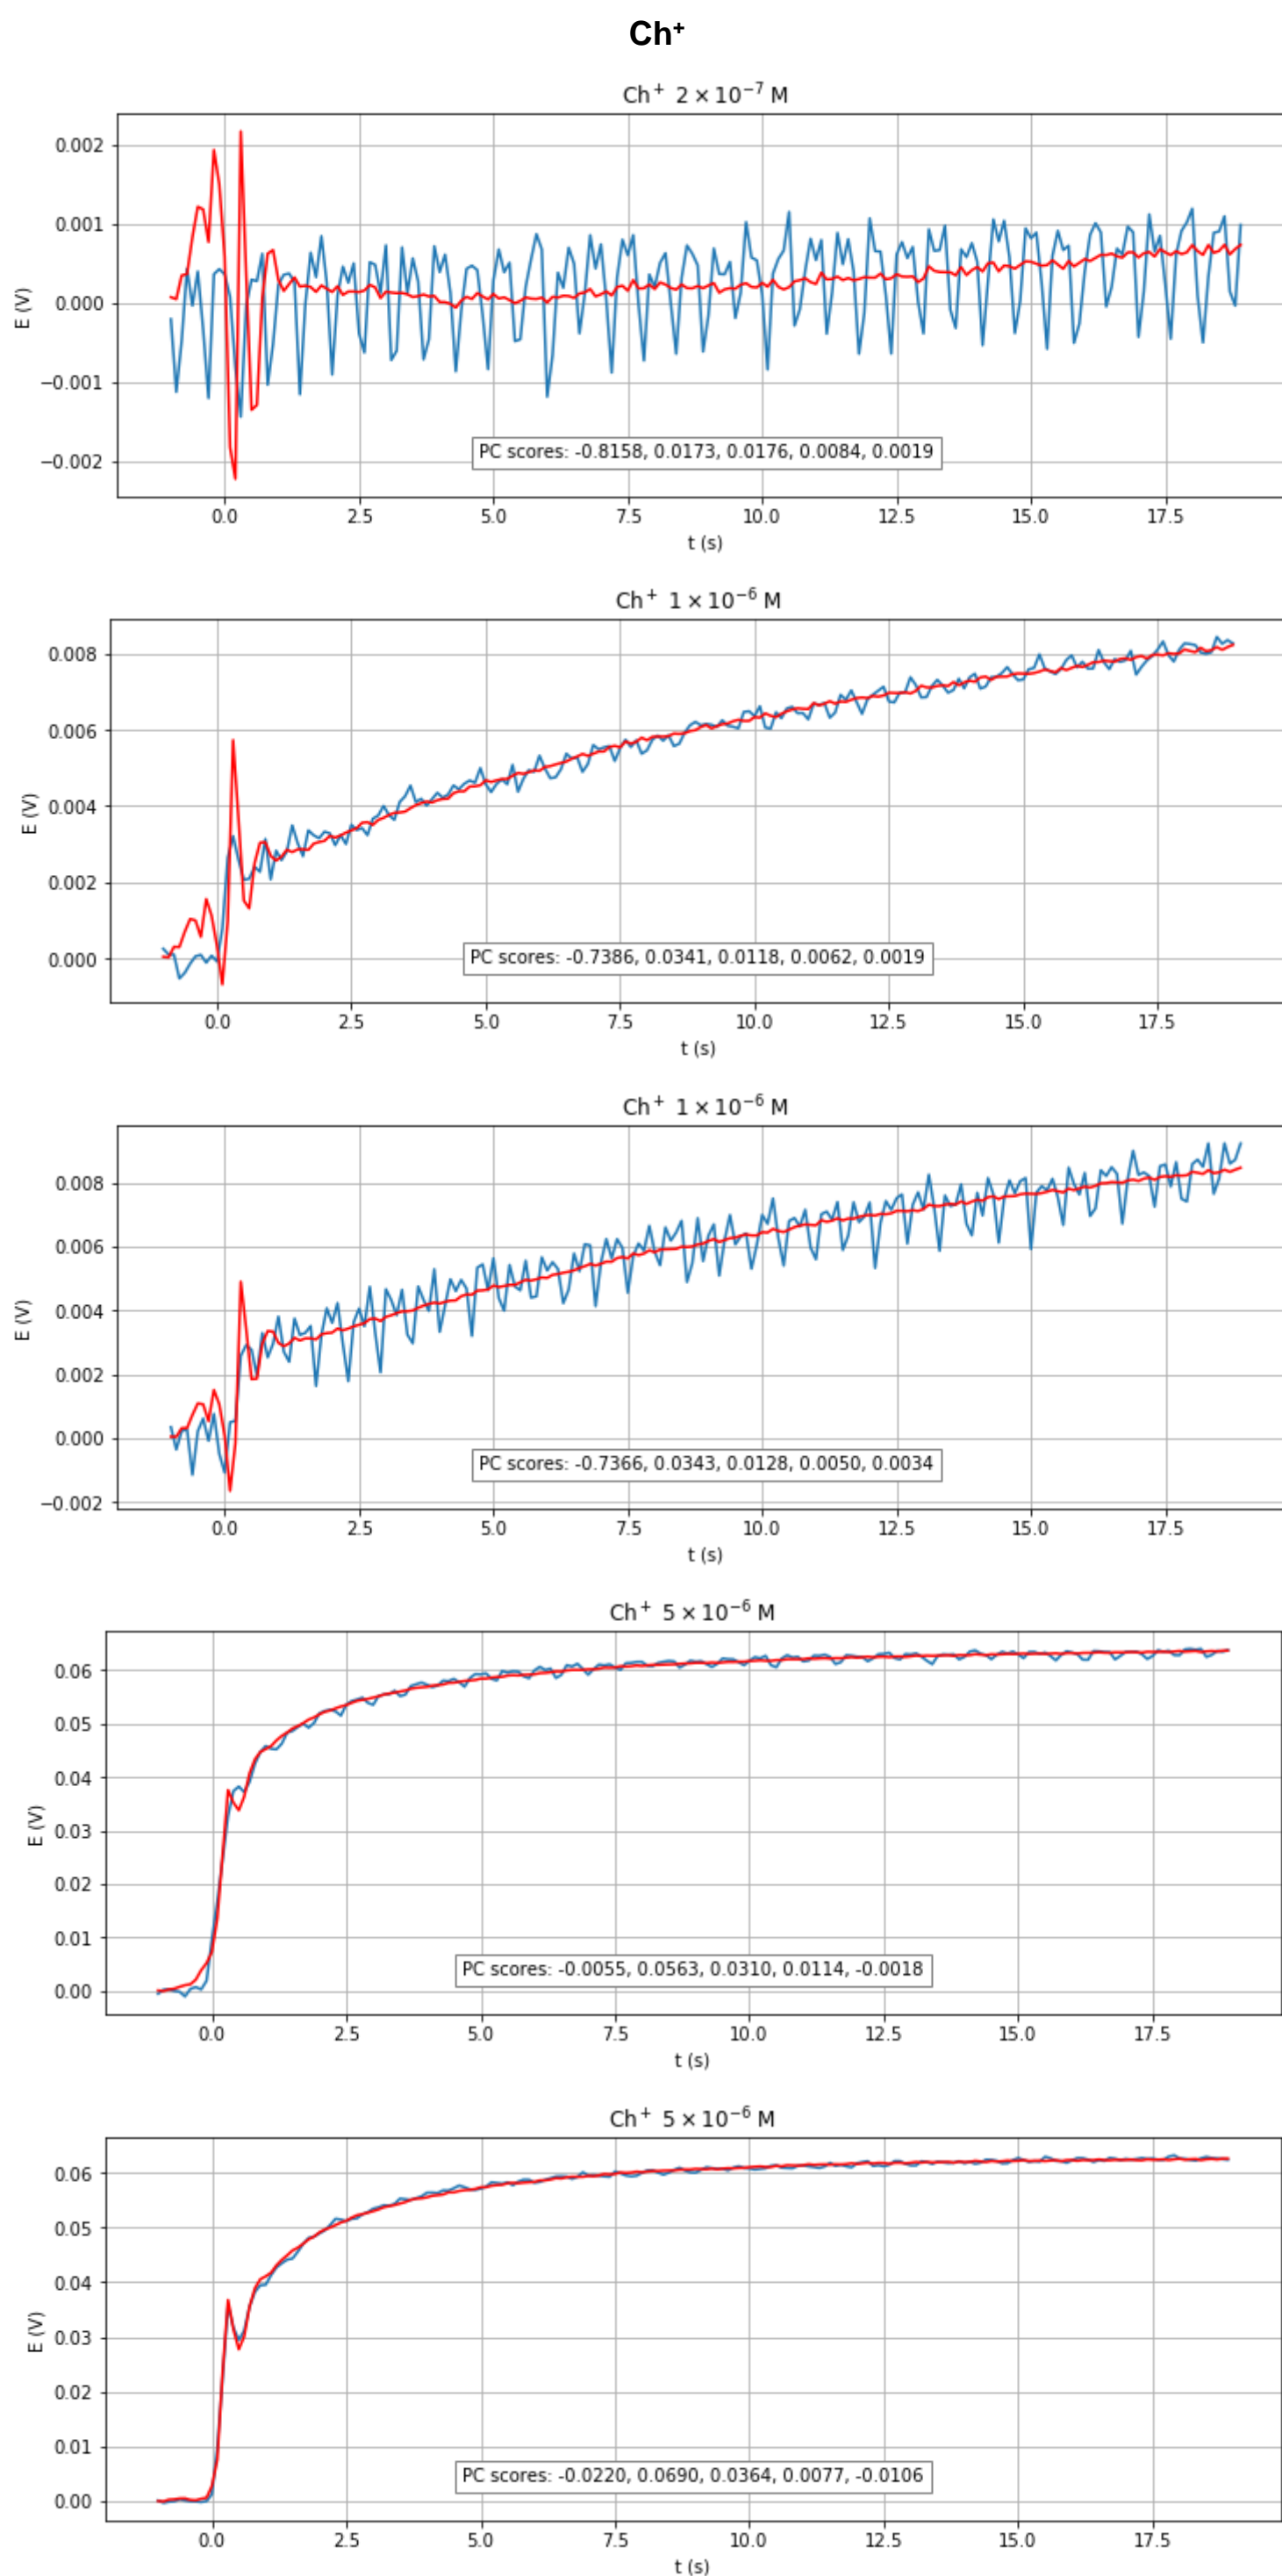

**Figure S1.** Transient potential signals obtained for individual cations and mixtures (blue) and their corresponding reconstructed signals superimposed (red). (Continued)



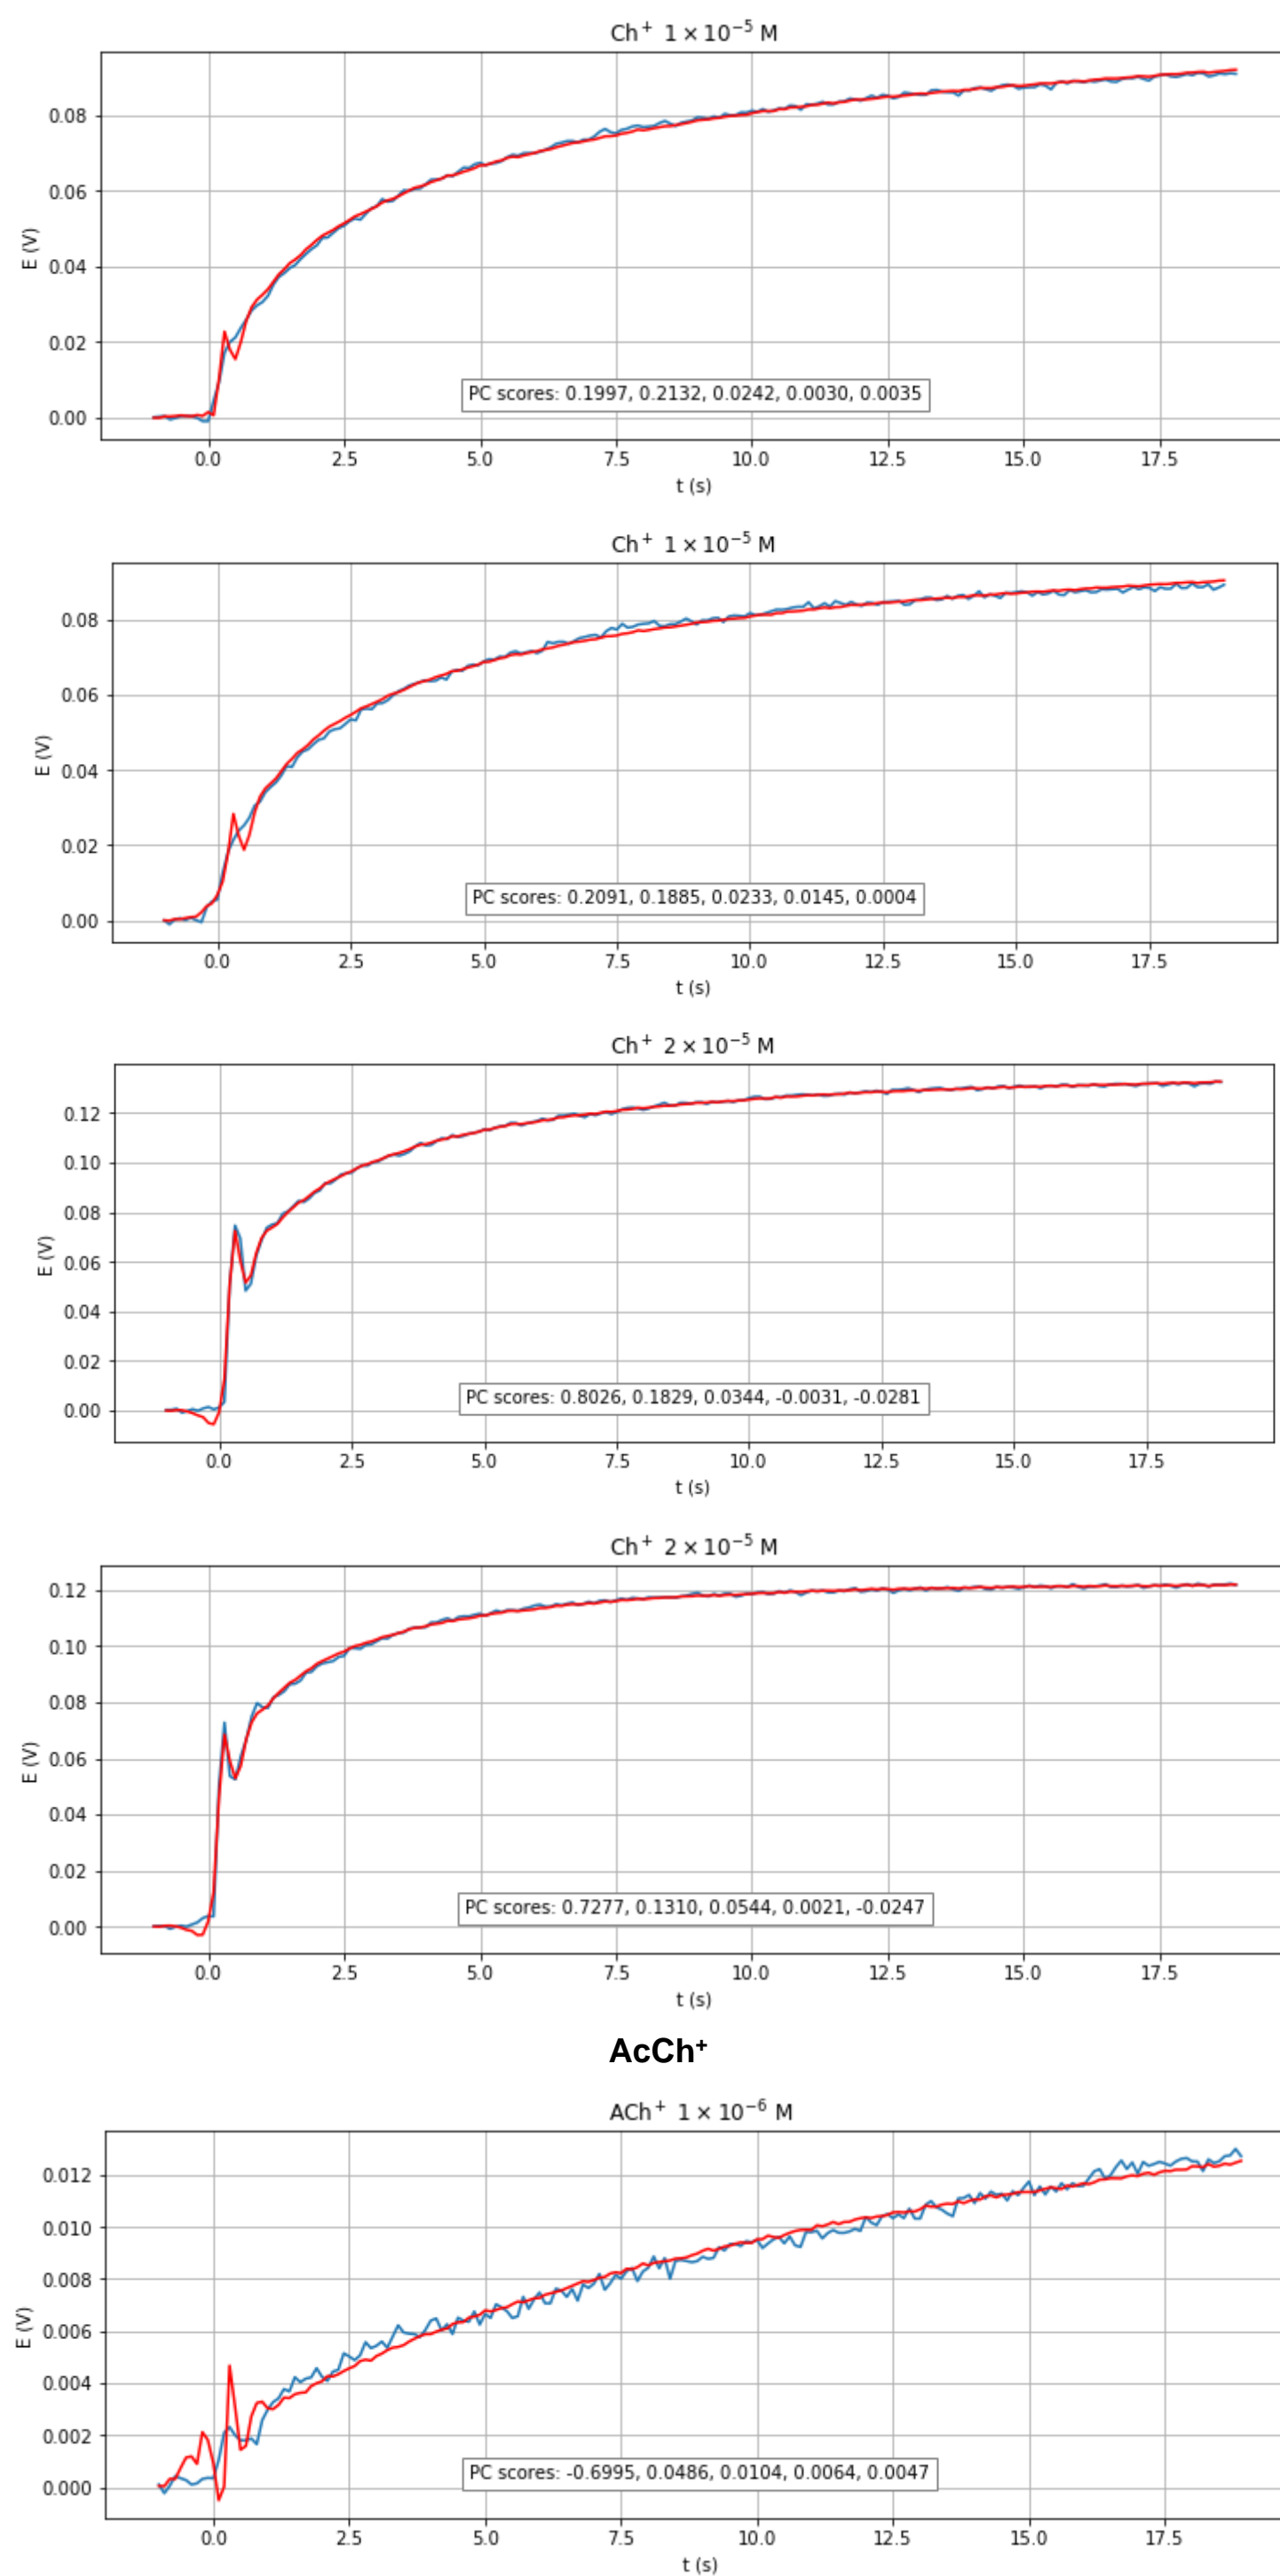

**Figure S1.** Transient potential signals obtained for individual cations and mixtures (blue) and their corresponding reconstructed signals superimposed (red). (Continued)

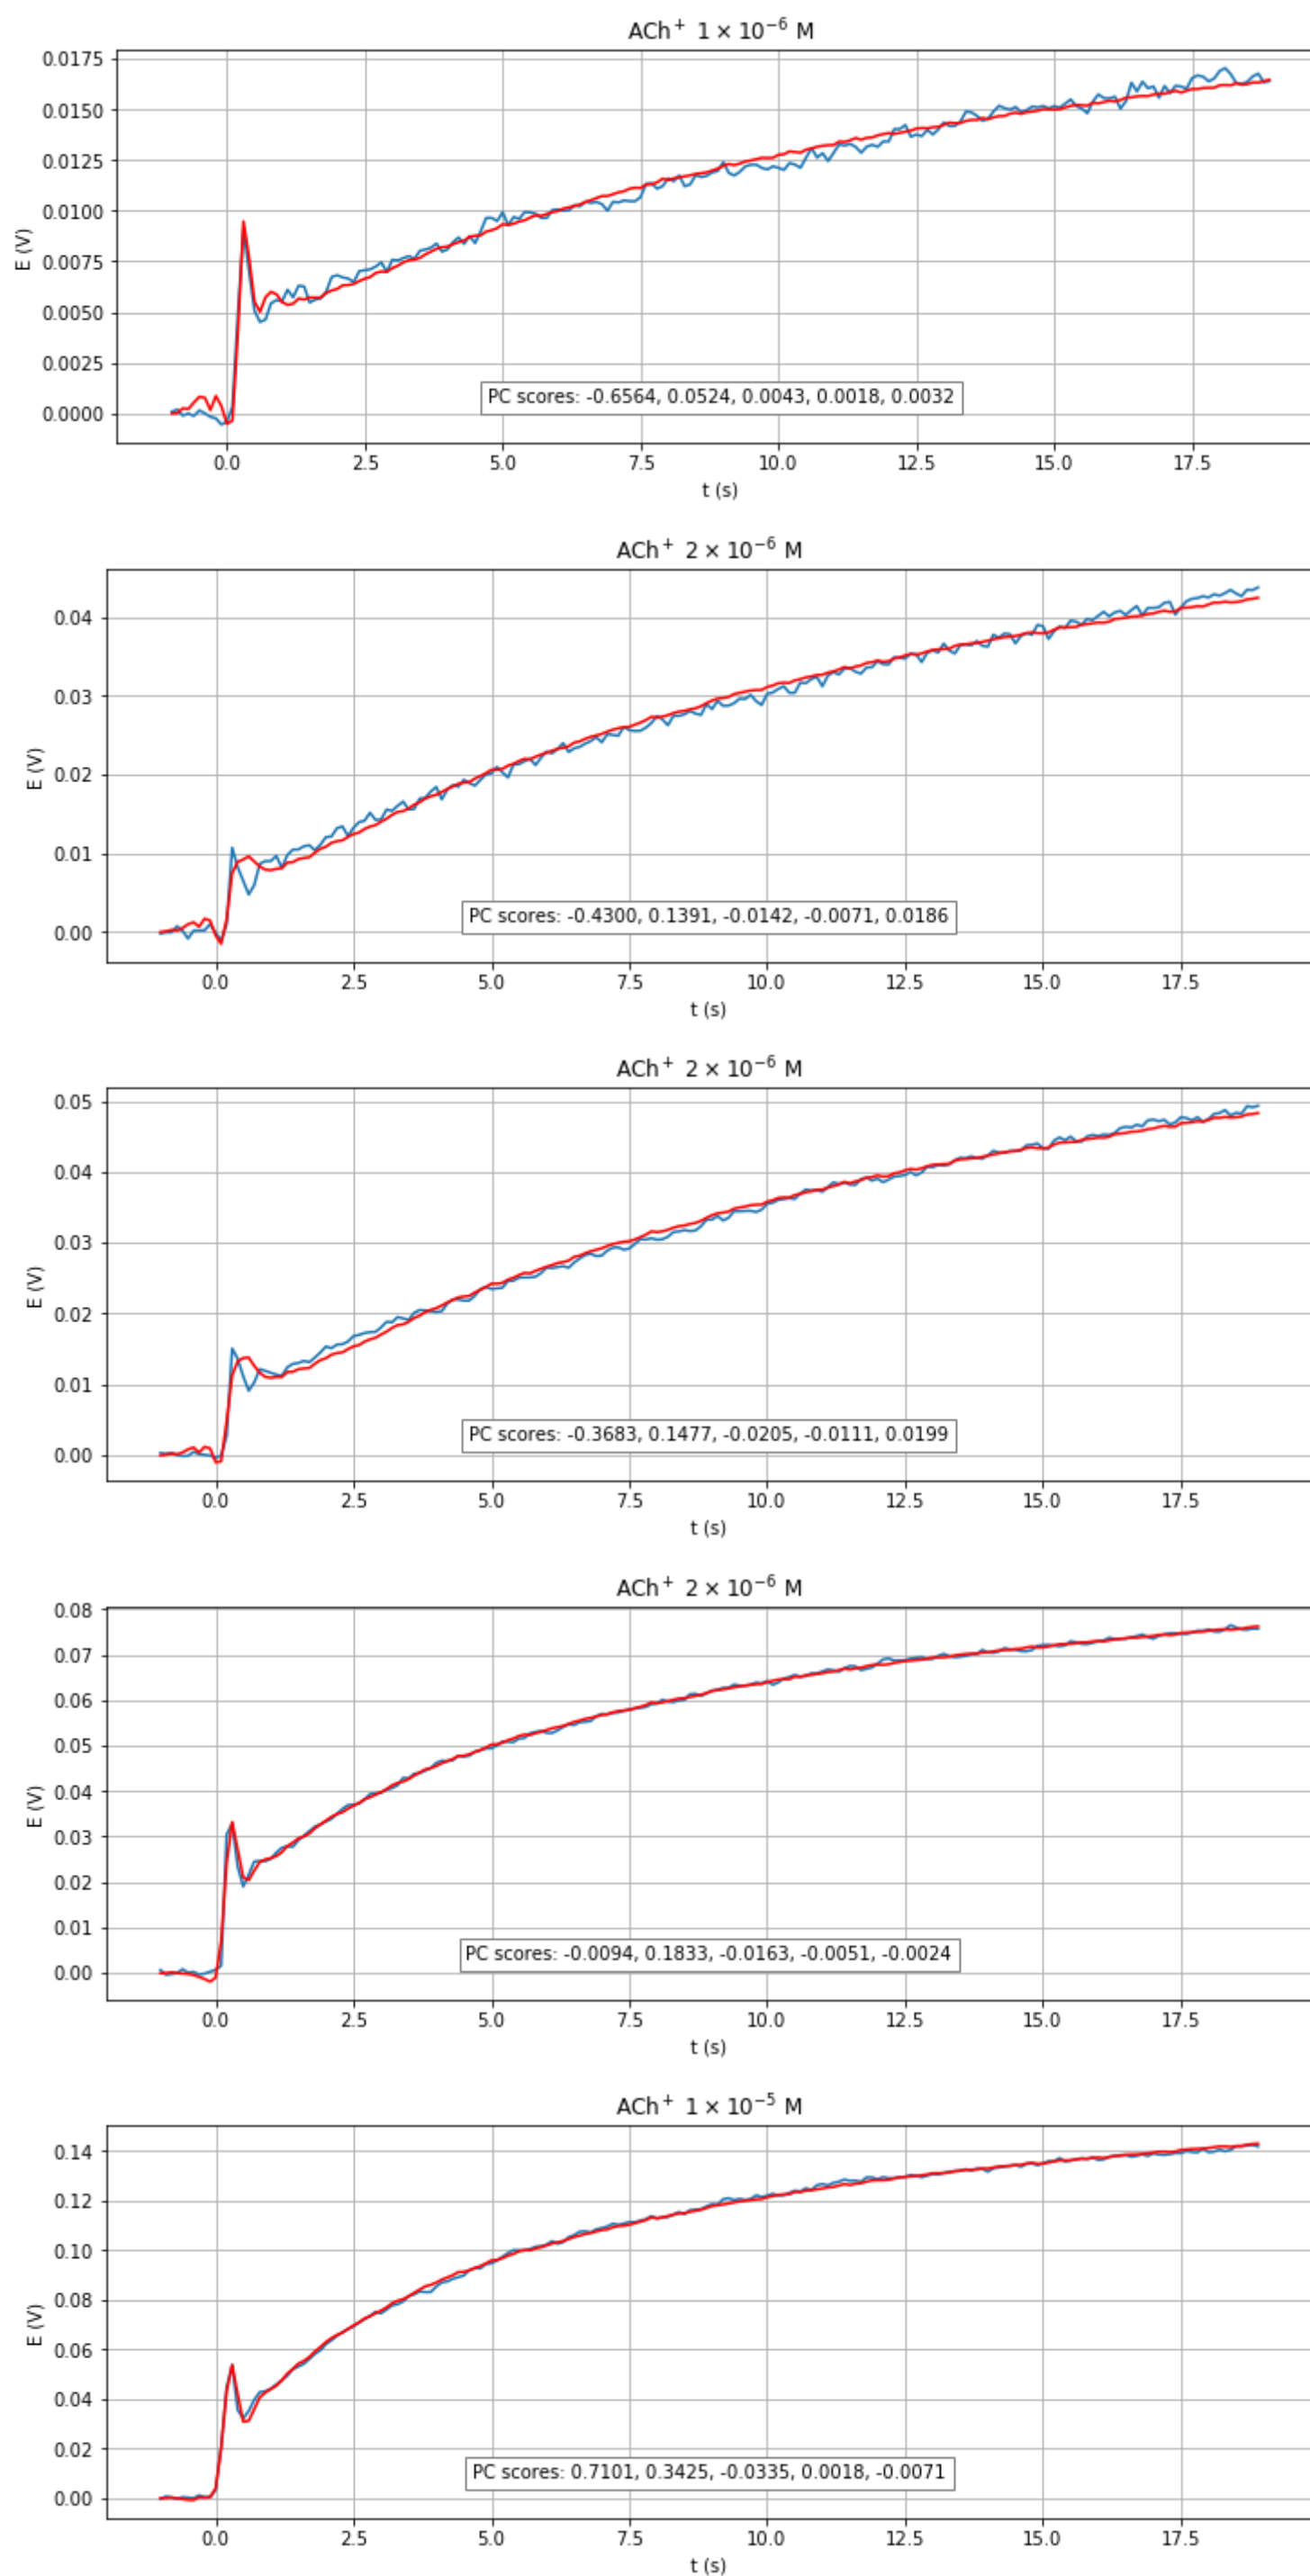

**Figure S1.** Transient potential signals obtained for individual cations and mixtures (blue) and their corresponding reconstructed signals superimposed (red). (Continued)

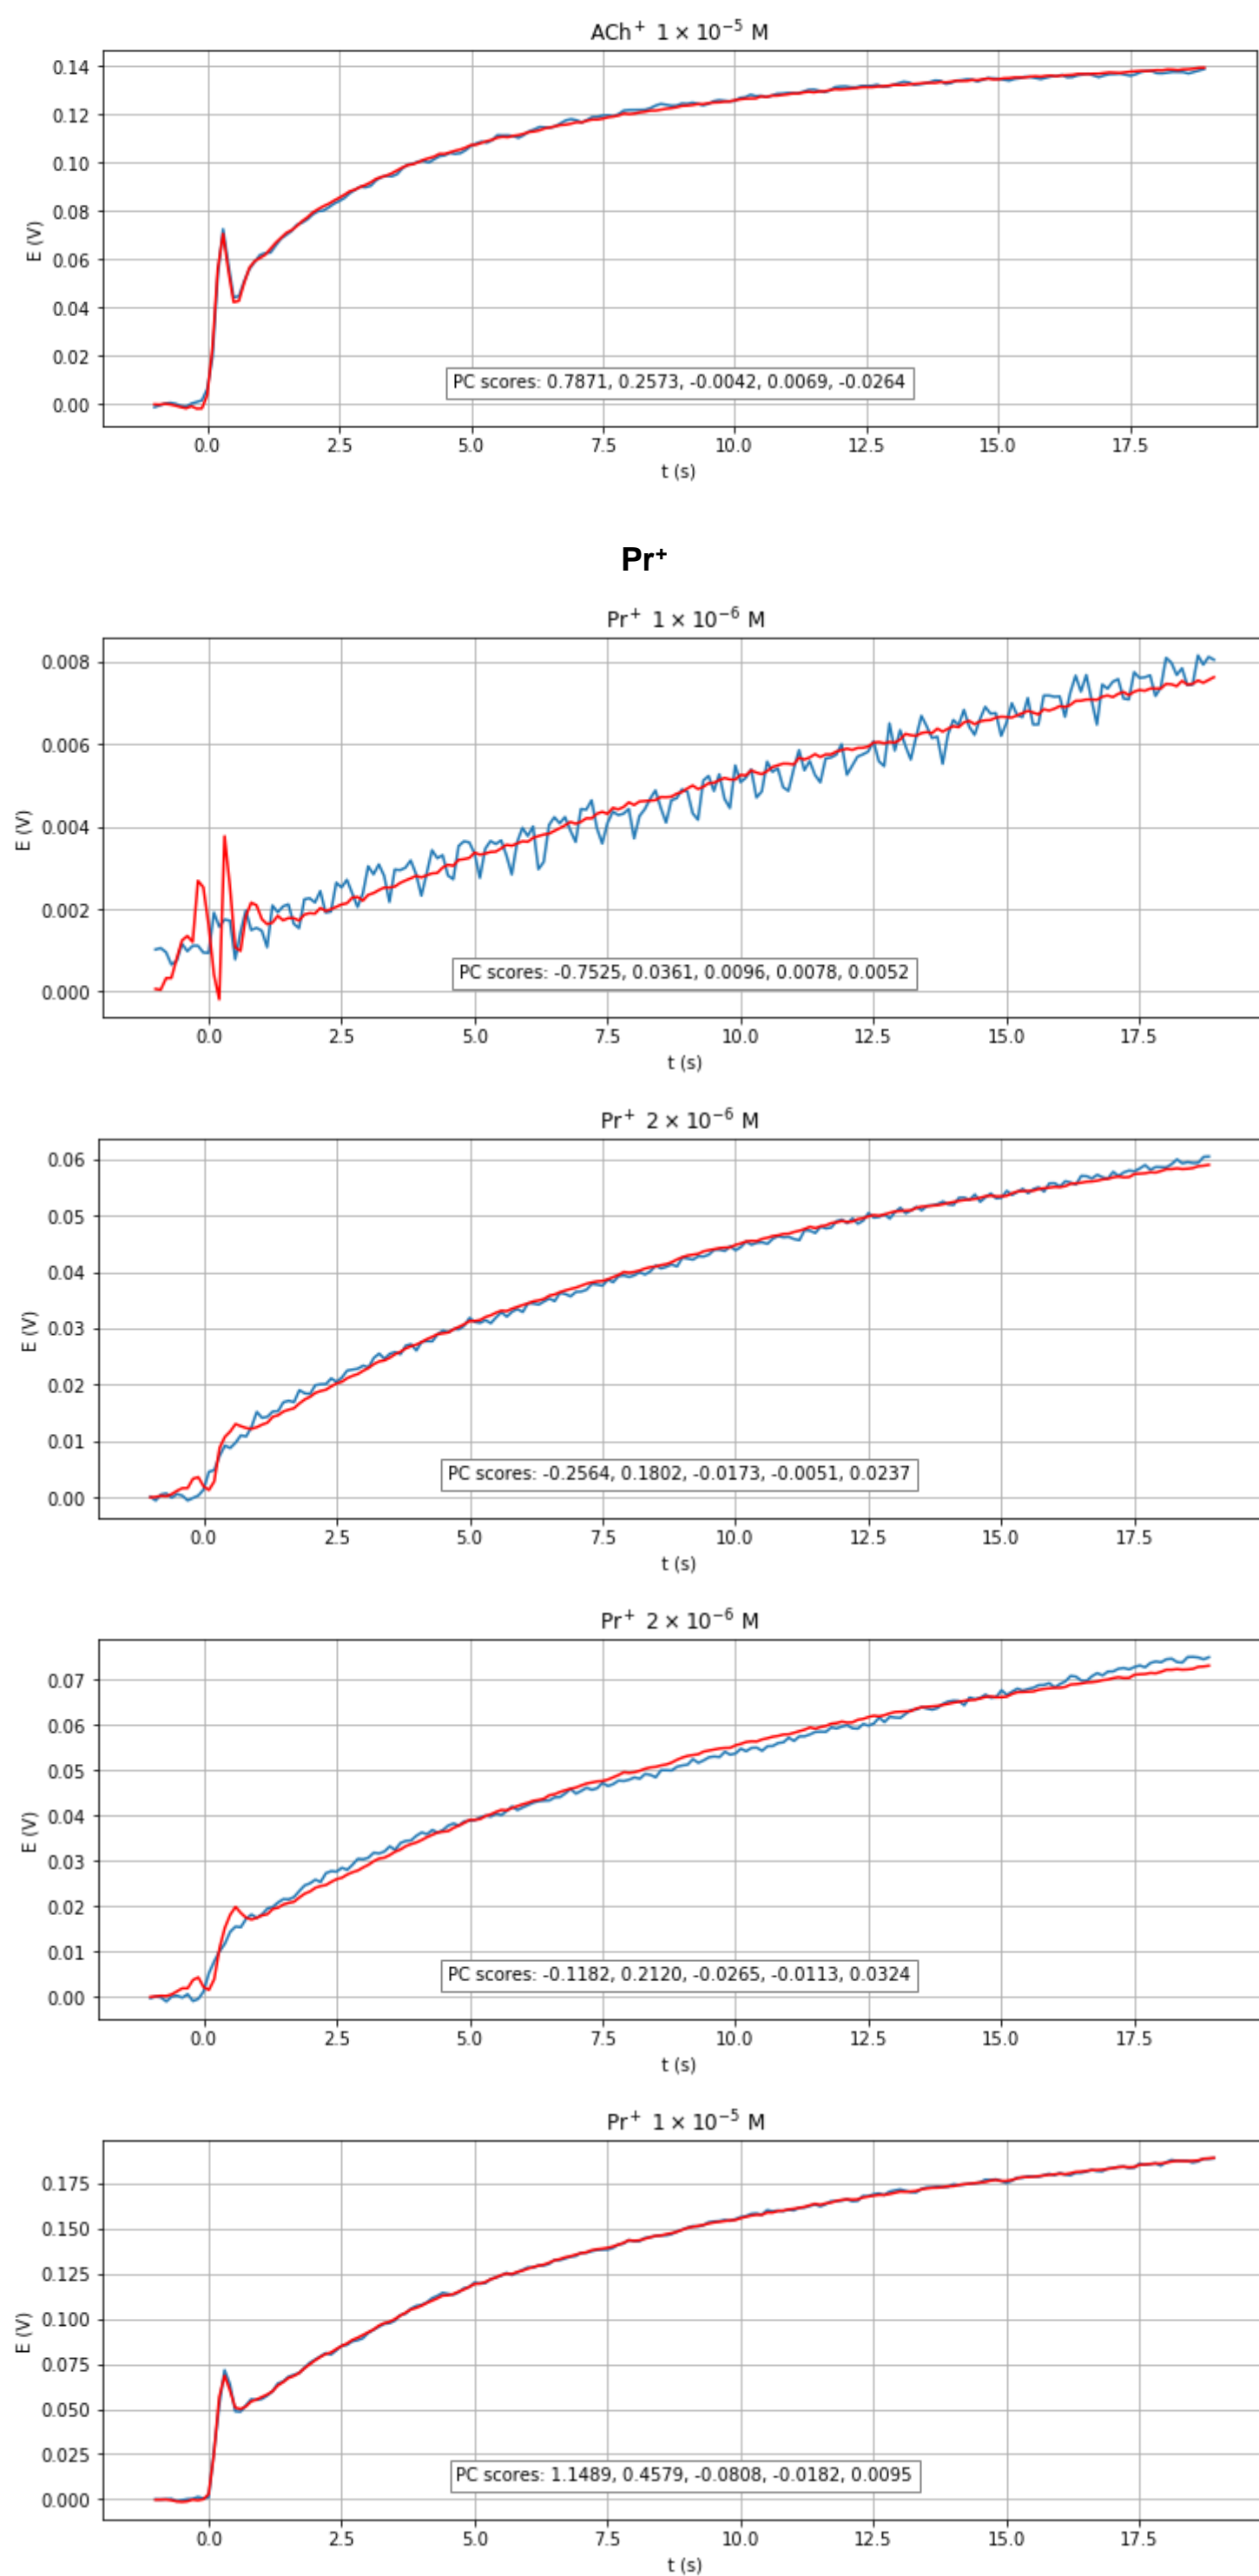

**Figure S1.** Transient potential signals obtained for individual cations and mixtures (blue) and their corresponding reconstructed signals superimposed (red). (Continued)

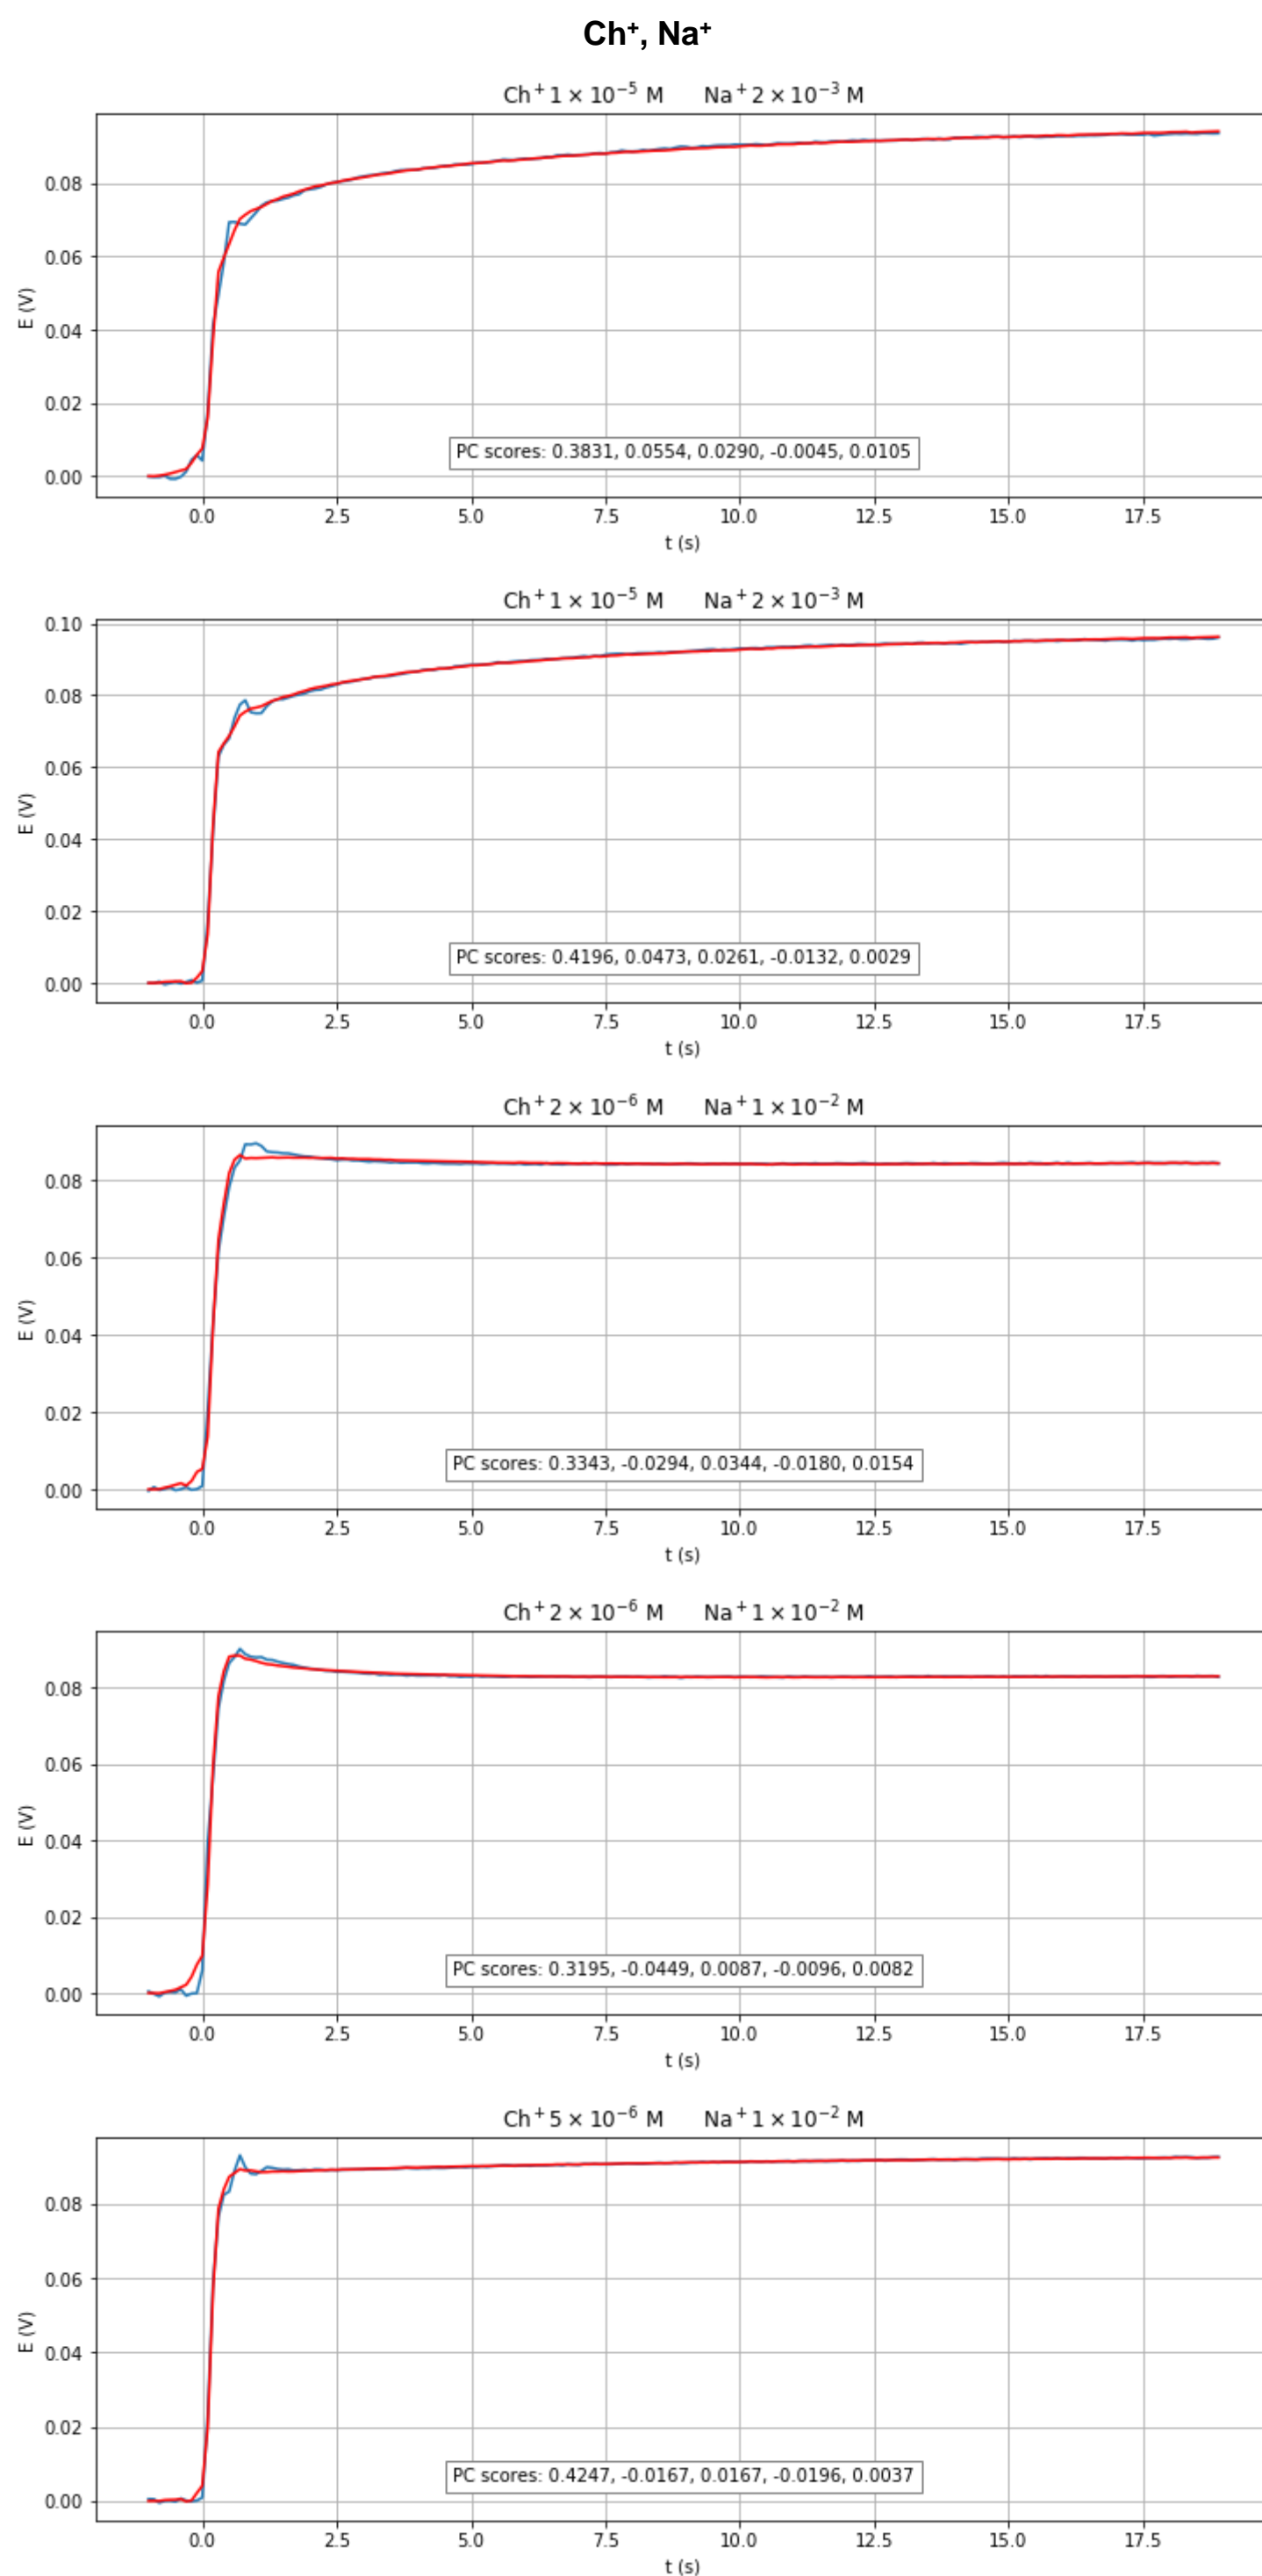

**Figure S1.** Transient potential signals obtained for individual cations and mixtures (blue) and their corresponding reconstructed signals superimposed (red). (Continued)

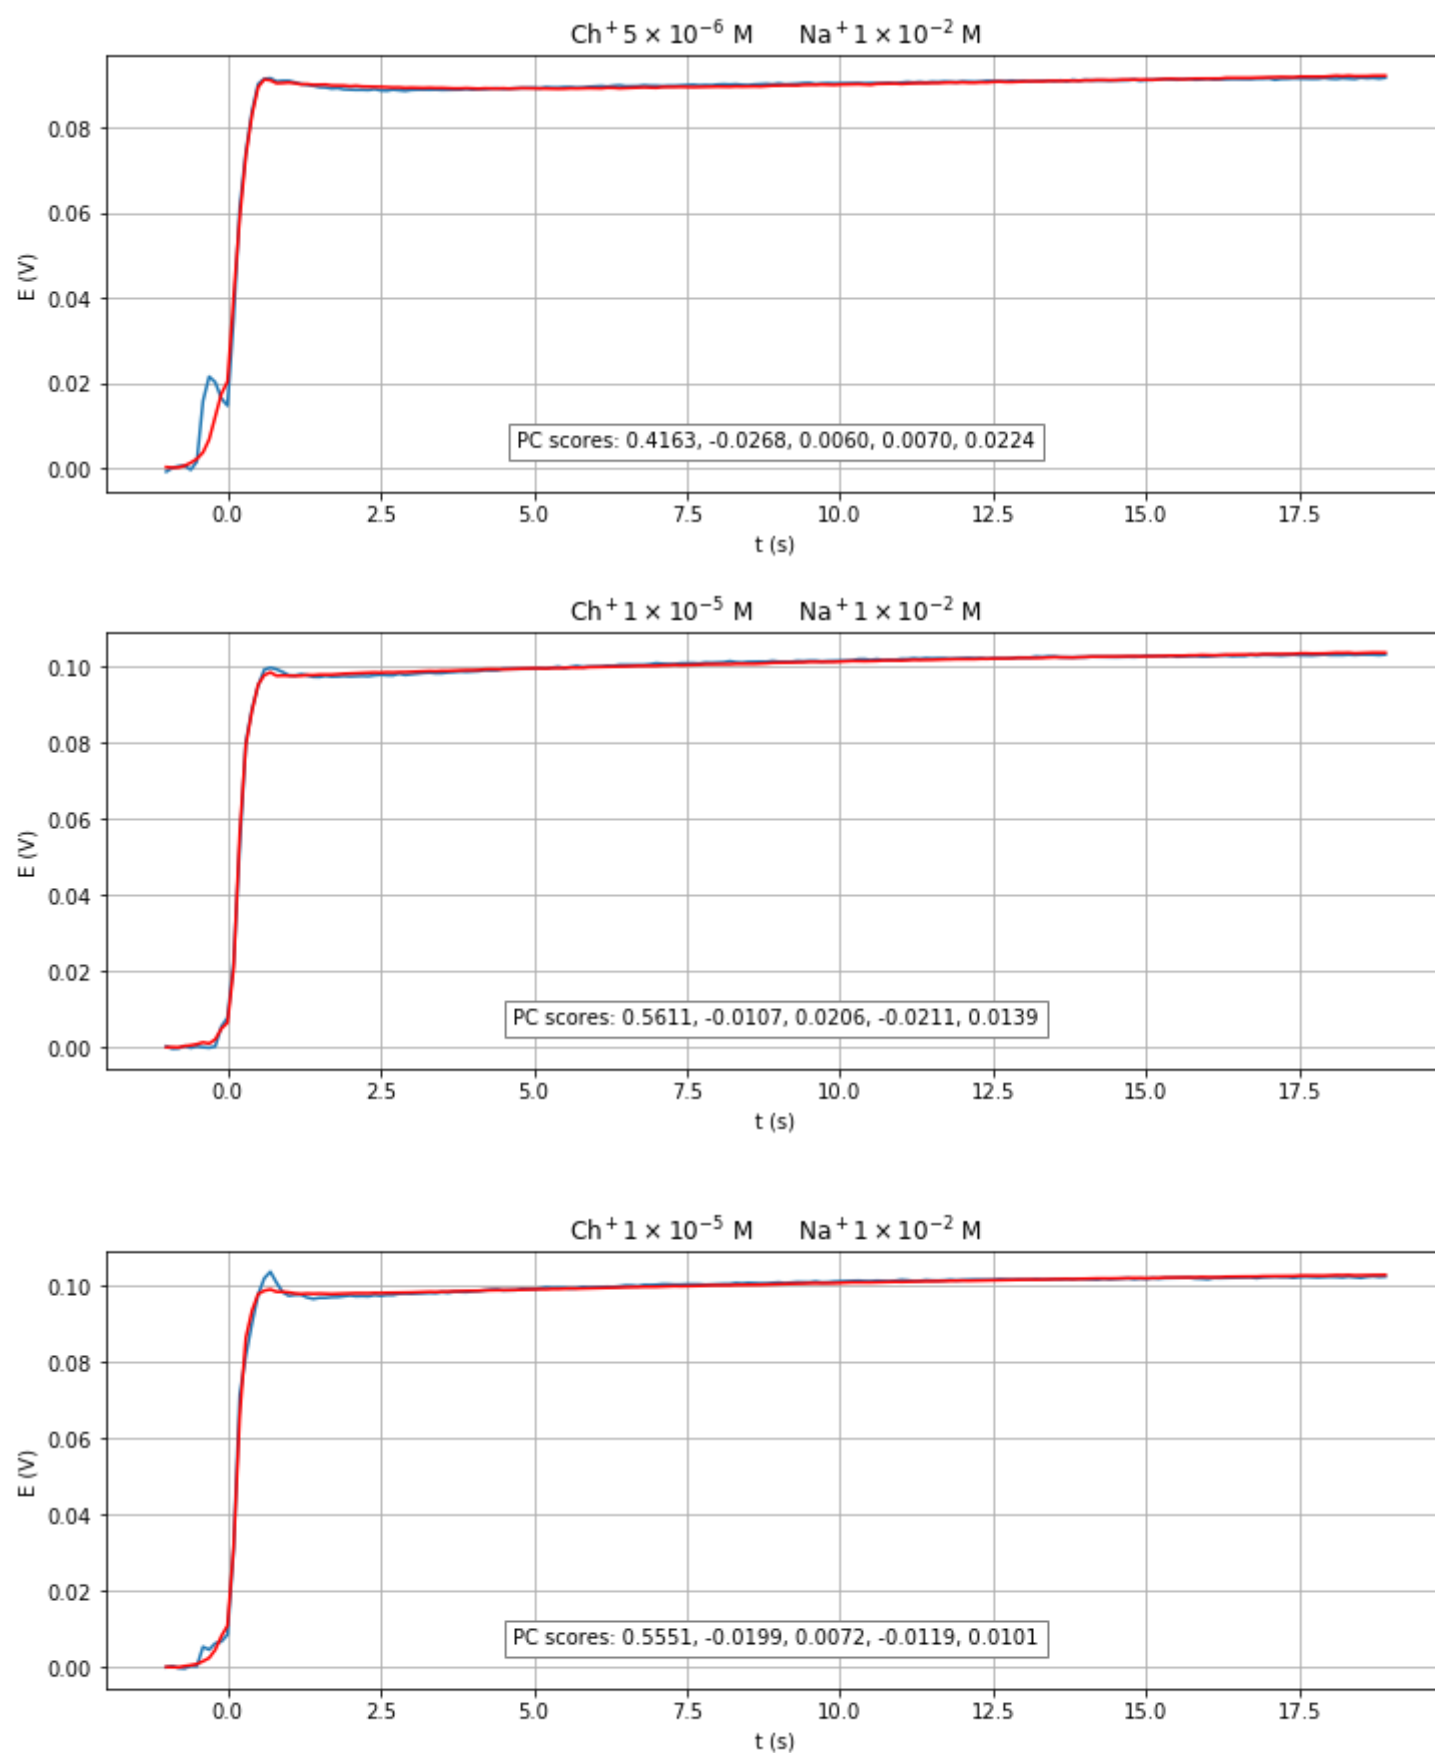

**Figure S1.** Transient potential signals obtained for individual cations and mixtures (blue) and their corresponding reconstructed signals superimposed (red).

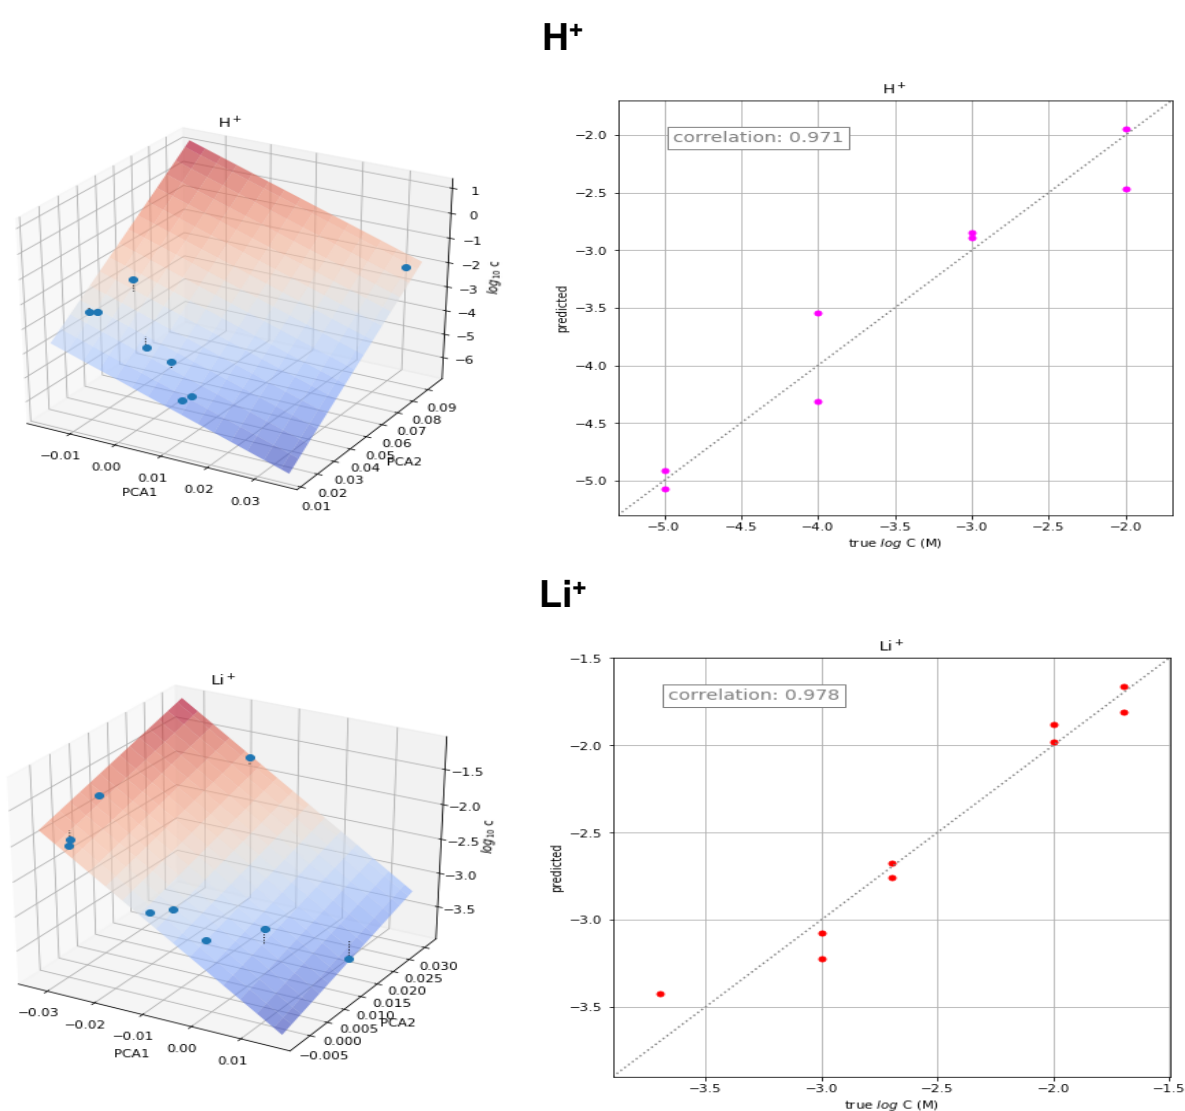

**Ca<sup>2+</sup>**

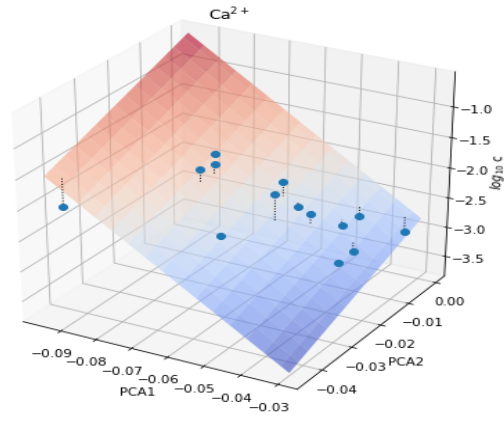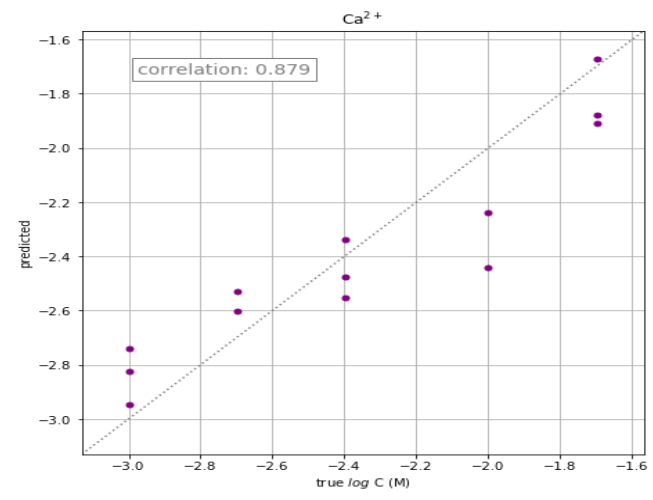

**Mg<sup>2+</sup>**

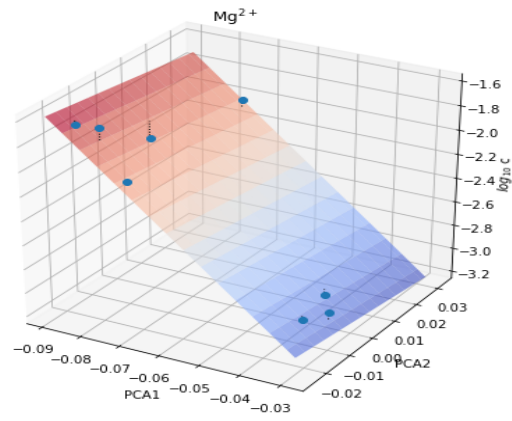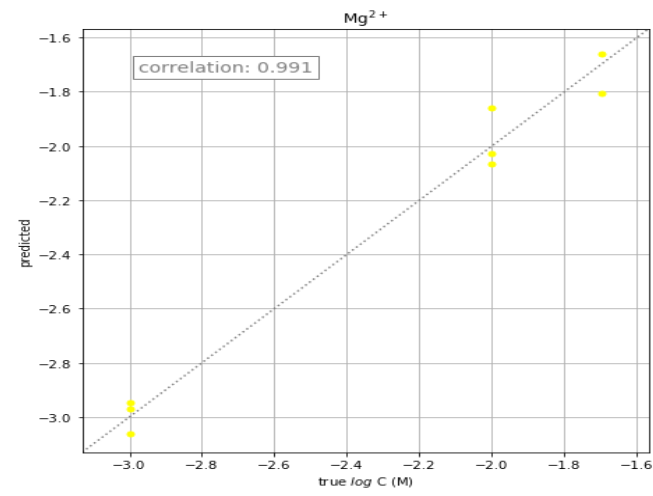

**AcCh<sup>+</sup>**

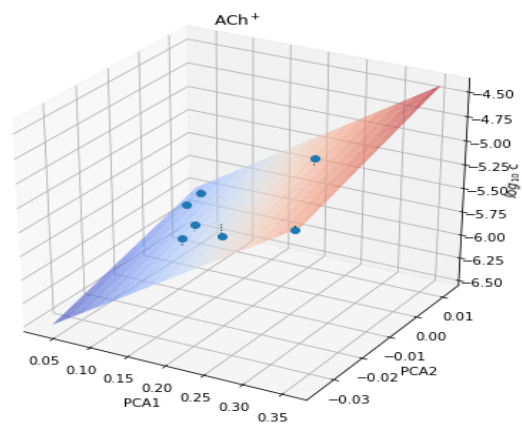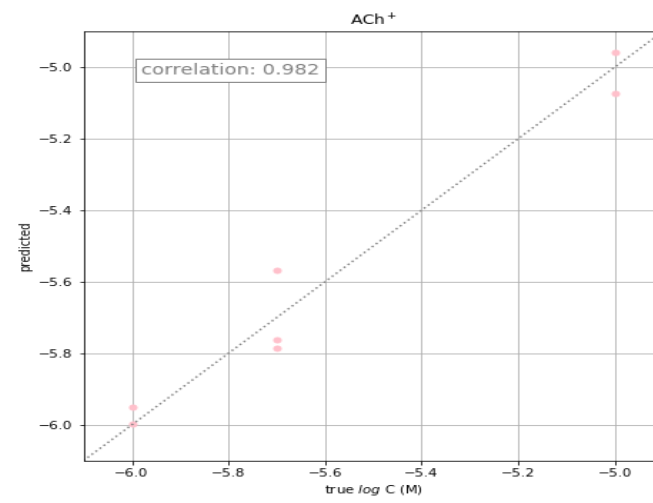

**Pr<sup>+</sup>**

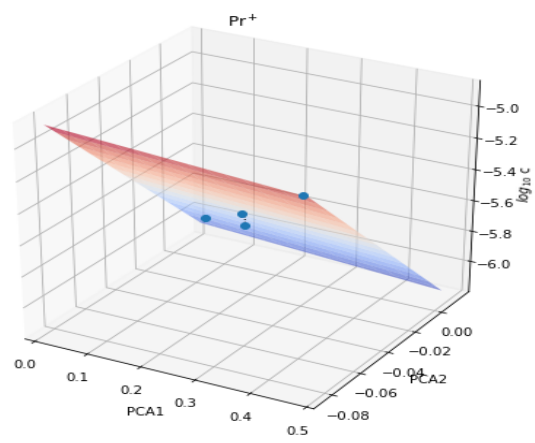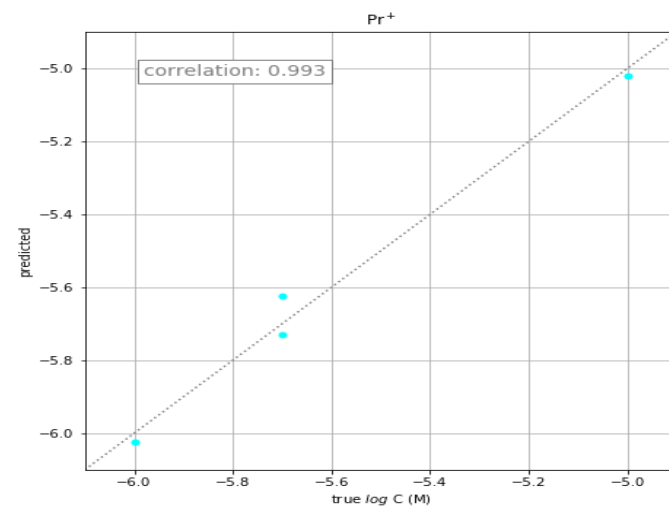

**Figure S2.** Three-dimensional plots PC1 and PC2 scores versus log C (left) and plots of the concentration values predicted versus the actual values (right) for H<sup>+</sup>, Li<sup>+</sup>, Ca<sup>2+</sup>, Mg<sup>2+</sup>, AcCh<sup>+</sup> and Pr<sup>+</sup>.
